# Supplementary material for: Synthesis of chiral 1,4-oxazepane-5-carboxylic acids from polymer-supported homoserine
Source: Royal Society of Chemistry journal article supplement (doi:10.1039/d0ra07997a), 2020-01-01
Supplement: d0ra07997a1.pdf [file d0ra07997a1.pdf]

## Supporting Information

### Synthesis of Chiral 1,4-Oxazepane-5-Carboxylic Acids from Polymer-Supported Homoserine

Petra Králová,<sup>1</sup> Barbora Lemrová,<sup>1</sup> Michal Maloň,<sup>2</sup> and Miroslav Soural<sup>1,3\*</sup>

<sup>1</sup> Department of Organic Chemistry, Faculty of Science, Palacký University, 771 46 Olomouc, Czech Republic

<sup>2</sup> JEOL (U.K.) Ltd., JEOL House, Silver Court, Watchmead, Welwyn Garden City, Hertfordshire AL7 1LT, United Kingdom

<sup>3</sup> Institute of Molecular and Translational Medicine, Faculty of Medicine and Dentistry, Palacký University, Hněvotínská 5, 779 00 Olomouc, Czech Republic

\*Corresponding author. E-mail: [miroslav.soural@upol.cz](mailto:miroslav.soural@upol.cz)

### Content

|                                                                                                                          |           |
|--------------------------------------------------------------------------------------------------------------------------|-----------|
| <b>Analytical Data (NMR, IR, HRMS and optical rotation) of Prepared Derivatives</b> .....                                | <b>S2</b> |
| (-)-(S)-2-nitro-N-(2-oxo-2-phenethyl)-N-(2-oxotetrahydrofuran-3-yl)benzenesulfonamide <b>5a</b> .....                    | S2        |
| (-)-ammonium (2R,5S)-2-phenyl-4-tosyl-1,4-oxazepane-5-carboxylate <b>6g</b> .....                                        | S9        |
| (-)-(2R,5S)-4-((2-aminophenyl)sulfonyl)-2-phenyl-1,4-oxazepane-5-carboxylic acid <b>7a</b> .....                         | S11       |
| (-)-(2R,5S)-4-((2-aminophenyl)sulfonyl)-2-phenyl-1,4-oxazepane-5-carboxamide <b>7b<sup>2R</sup></b> .....                | S18       |
| (+)-(2S,5S)-4-((2-aminophenyl)sulfonyl)-2-phenyl-1,4-oxazepane-5-carboxamide <b>7b<sup>2S</sup></b> .....                | S20       |
| (-)-(2R,5S)-4-((2-amino-4-methoxyphenyl)sulfonyl)-2-phenyl-1,4-oxazepane-5-carboxylic acid <b>7e</b> .....               | S25       |
| (-)-(2RS,5S)-4-((2-amino-4-chlorophenyl)sulfonyl)-2-phenyl-1,4-oxazepane-5-carboxylic acid <b>7f<sup>2RS</sup></b> ..... | S27       |
| (-)-(2R,5S)-4-((2-aminophenyl)sulfonyl)-2-(2-fluorophenyl)-1,4-oxazepane-5-carboxylic acid <b>7i<sup>2R</sup></b> .....  | S29       |
| (-)-(2S,5S)-4-((2-aminophenyl)sulfonyl)-2-(2-fluorophenyl)-1,4-oxazepane-5-carboxylic acid <b>7i<sup>2S</sup></b> .....  | S31       |
| (-)-(2R,5S)-4-((2-aminophenyl)sulfonyl)-2-(3-fluorophenyl)-1,4-oxazepane-5-carboxylic acid <b>7k</b> .....               | S33       |
| (+)-(2R,5S)-4-((2-aminophenyl)sulfonyl)-2-(p-tolyl)-1,4-oxazepane-5-carboxylic acid <b>7m</b> .....                      | S35       |
| (+)-(2R,5S)-4-((2-aminophenyl)sulfonyl)-2-(4-fluorophenyl)-1,4-oxazepane-5-carboxylic acid <b>7o</b> .....               | S37       |
| (-)-(2R,5S)-4-((2-aminophenyl)sulfonyl)-2-(4-(trifluoromethyl)phenyl)-1,4-oxazepane-5-carboxylic acid <b>7q</b> .....    | S39       |
| (-)-(2R,5S)-4-((2-aminophenyl)sulfonyl)-2-(thiophen-3-yl)-1,4-oxazepane-5-carboxylic acid <b>7t</b> .....                | S41       |
| (-)-(S)-3-(1,1-dioxo-4-(o-tolyl)benzo[f][1,2,5]thiadiazepin-2(5H)-yl)dihydrofuran-2(3H)-one <b>9h</b> .....              | S43       |
| (-)-(S)-3-(4-(2-bromophenyl)-1,1-dioxobenzof[f][1,2,5]thiadiazepin-2(5H)-yl)dihydrofuran-2(3H)-one <b>9j</b> .....       | S45       |
| (+)-(S)-((2-aminophenyl)sulfonyl)-L-homoserine <b>10r</b> .....                                                          | S47       |
| (-)-(S)-N-(4-methoxyphenethyl)-2-nitro-N-(2-oxotetrahydrofuran-3-yl)benzenesulfonamide <b>11n</b> .....                  | S50       |

## Analytical Data (NMR, IR, HRMS and optical rotation) of Prepared Derivatives

### (-)-(S)-2-nitro-N-(2-oxo-2-phenethyl)-N-(2-oxotetrahydrofuran-3-yl)benzenesulfonamide **5a**

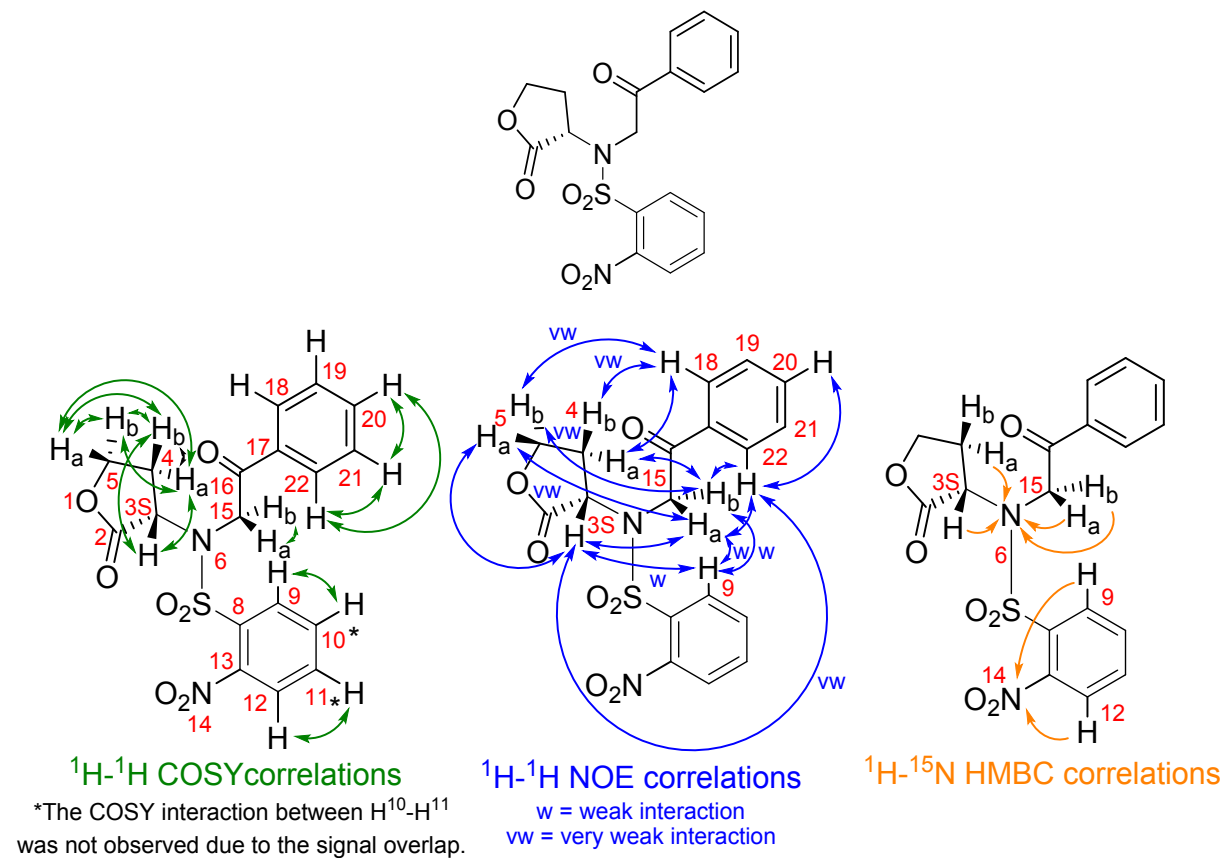

**Figure S1.** Detailed COSY, NOE and  $^1\text{H}$ - $^{15}\text{N}$  HMBC NMR analysis of lactone **5a**

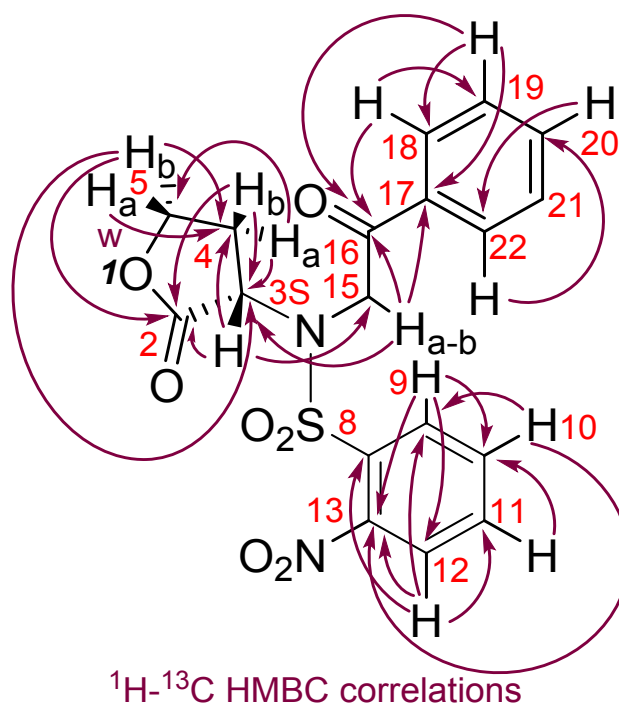

**Figure S2.** Detailed  $^1\text{H}$ - $^{13}\text{C}$  HMBC NMR analysis of lactone **5a**

**Table S1.**  $^1\text{H}$  NMR (500 MHz) and  $^{13}\text{C}\{^1\text{H}\}$  NMR (126 MHz) data, including detailed COSY,  $^1\text{H}$ - $^{13}\text{C}$  HMBC and NOE correlations for lactone **5a**<sup>a</sup>

| position     | $^1\text{H}$ NMR $\delta_{\text{H}}$ [ppm] <sup>b</sup> | splitting pattern, $J$ [Hz], integration | $^{13}\text{C}\{^1\text{H}\}$ NMR $\delta_{\text{C}}$ [ppm] | COSY correlations                                                                                      | $^1\text{H}$ - $^{13}\text{C}$ HMBC correlations | NOE correlations                                                                             |
|--------------|---------------------------------------------------------|------------------------------------------|-------------------------------------------------------------|--------------------------------------------------------------------------------------------------------|--------------------------------------------------|----------------------------------------------------------------------------------------------|
| <b>2</b>     | -                                                       | -                                        | 174.4                                                       | -                                                                                                      | -                                                | -                                                                                            |
| <b>3</b>     | 5.05                                                    | dd, $J = 12.4, 8.7$ Hz, 1H               | 58.6                                                        | $\text{H}_a^4, \text{H}_b^4$                                                                           | 28.4, 53.2, 174.4                                | $\text{H}_a^5, \text{H}^9$ (weak int.), $\text{H}_a^{15}, \text{H}^{18,22}$ (very weak int.) |
| <b>4</b>     | $\text{H}_a$ : 2.29                                     | dddd, $J = 12.5, 12.5, 11.2, 9.0$ Hz, 1H | 28.4                                                        | $\text{H}^3, \text{H}_a^5, \text{H}_b^5$                                                               | 58.6, 66.2                                       | $\text{H}_b^{15}, \text{H}^{18,22}$                                                          |
|              | $\text{H}_b$ : 2.57                                     | dddd, $J = 12.7, 8.7, 5.8, 1.0$ Hz, 1H   |                                                             | $\text{H}^3, \text{H}_a^5, \text{H}_b^5$ (weak int.)                                                   | 58.6, 174.4                                      | $\text{H}^{18,22}$ (very weak int.)                                                          |
| <b>5</b>     | $\text{H}_a$ : 4.24                                     | ddd, $J = 11.2, 9.0, 5.8$ Hz, 1H         | 66.7                                                        | $\text{H}_a^4, \text{H}_b^4, \text{H}_b^5$<br>$\text{H}_a^4, \text{H}_b^4$ (weak int.), $\text{H}_a^5$ | 28.4 (weak int.)                                 | $\text{H}^3, \text{H}_a^{15}$                                                                |
|              | $\text{H}_b$ : 4.31                                     | ddd, $J = 9.0, 9.0, 1.0$ Hz, 1H          |                                                             | $\text{H}_a^5,$                                                                                        | 28.4, 58.6, 174.4                                | $\text{H}_a^{15}$ (very weak int.), $\text{H}^{18,22}$ (very weak int.)                      |
| <b>8</b>     | -                                                       | -                                        | 133.8                                                       | -                                                                                                      | -                                                | -                                                                                            |
| <b>9</b>     | 8.26                                                    | dd, $J = 7.7, 1.6$ Hz, 1H                | 131.6                                                       | $\text{H}^{10}$                                                                                        | 125.4, 135.4, 148.9                              | $\text{H}^{11}, \text{H}^{12}$                                                               |
| <b>10</b>    | 7.81                                                    | m, 1H                                    | 125.1                                                       | $\text{H}^9$                                                                                           | 131.6, 148.9                                     | $\text{H}^{12}$                                                                              |
| <b>11</b>    | 7.77                                                    | m, 1H                                    | 133.3                                                       | $\text{H}^{12}$                                                                                        | 125.4                                            | $\text{H}^9$                                                                                 |
| <b>12</b>    | 7.75                                                    | m, 1H                                    | 135.4                                                       | $\text{H}^{11}$                                                                                        | 131.6, 133.3, 133.8, 148.9                       | $\text{H}^9, \text{H}^{10}$                                                                  |
| <b>13</b>    | -                                                       | -                                        | 148.9                                                       | -                                                                                                      | -                                                | -                                                                                            |
| <b>15</b>    | $\text{H}_a$ : 5.25                                     | $J = 19.2$ Hz, 1H                        | 53.2                                                        | $\text{H}_b^{15}$                                                                                      | 58.6, 135.5, 194.7                               | $\text{H}^3, \text{H}_a^5$ (very weak int.), $\text{H}^9$ (weak int.), $\text{H}^{18,22}$    |
|              | $\text{H}_b$ : 4.60                                     | d, $J = 19.2$ Hz, 1H                     |                                                             | $\text{H}_a^{15}$                                                                                      | 58.6, 135.5, 194.7                               | $\text{H}_a^4, \text{H}_b^5$ (very weak int.), $\text{H}^9$ (weak int.), $\text{H}^{18,22}$  |
| <b>16</b>    | -                                                       | -                                        | 194.7                                                       | -                                                                                                      | -                                                | -                                                                                            |
| <b>17</b>    | -                                                       | -                                        | 135.5                                                       | -                                                                                                      | -                                                | -                                                                                            |
| <b>18,22</b> | 7.94-7.96                                               | m, 2H                                    | 128.9                                                       | $\text{H}^{19,21}$                                                                                     | 129.8, 134.9, 194.7                              | $\text{H}^{20}$                                                                              |
| <b>19,21</b> | 7.50-7.54                                               | m, 2H                                    | 129.8                                                       | $\text{H}^{18,22}, \text{H}^{20}$                                                                      | 128.9, 135.5, 194.7                              | -                                                                                            |
| <b>20</b>    | 7.63-7.67                                               | m, 1H                                    | 134.9                                                       | $\text{H}^{21}$                                                                                        | 128.9                                            | $\text{H}^{18,22}$                                                                           |

<sup>a</sup>Assignments are based on extensive 1D and 2D NMR analysis ( $^1\text{H}$ - $^1\text{H}$  COSY,  $^1\text{H}$ - $^{13}\text{C}$  HMQC,  $^1\text{H}$ - $^{13}\text{C}$  HMBC and  $^1\text{H}$ - $^1\text{H}$  NOESY); measured in MeCN- $d_3$ ; int. = interaction.

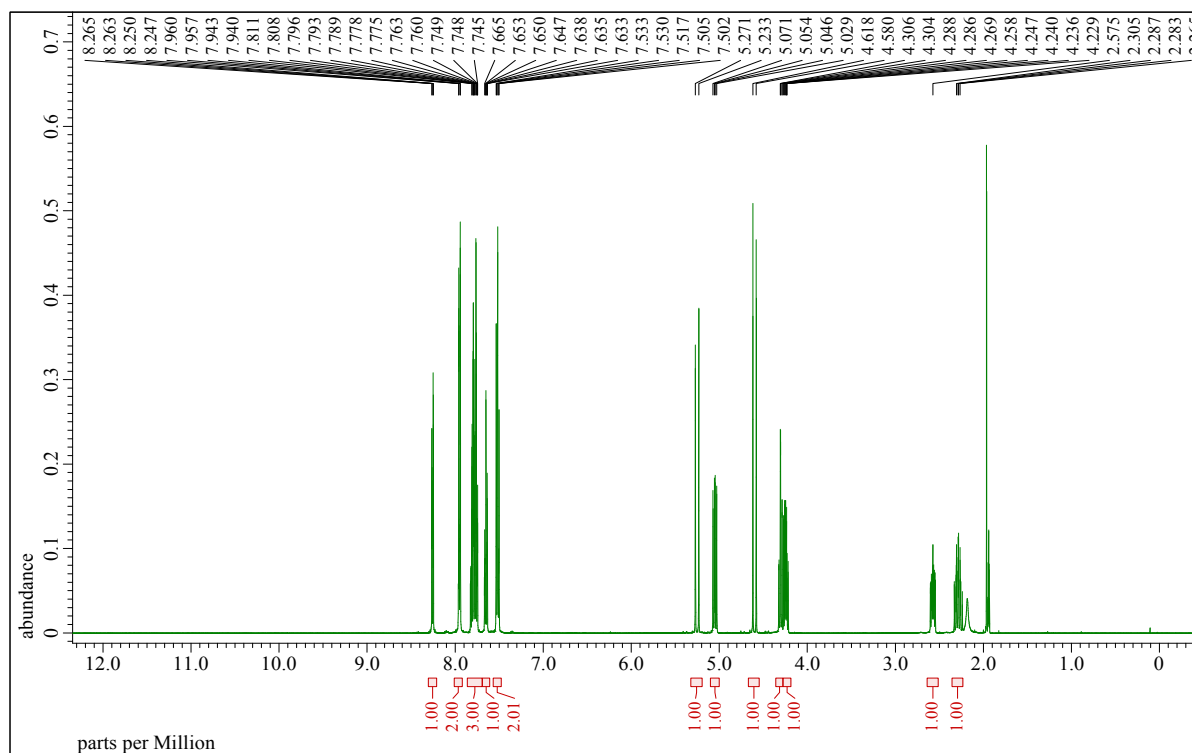

**Figure S3.**  $^1\text{H}$  NMR spectrum of **5a** (500 MHz,  $\text{MeCN-}d_3$ ); note: the signal of non-deuterated  $\text{MeCN}$  at 1.96 ppm and  $\text{MeCN-}d_3$  at 1.94 ppm in ratio 62:38 in  $^1\text{H}$  NMR

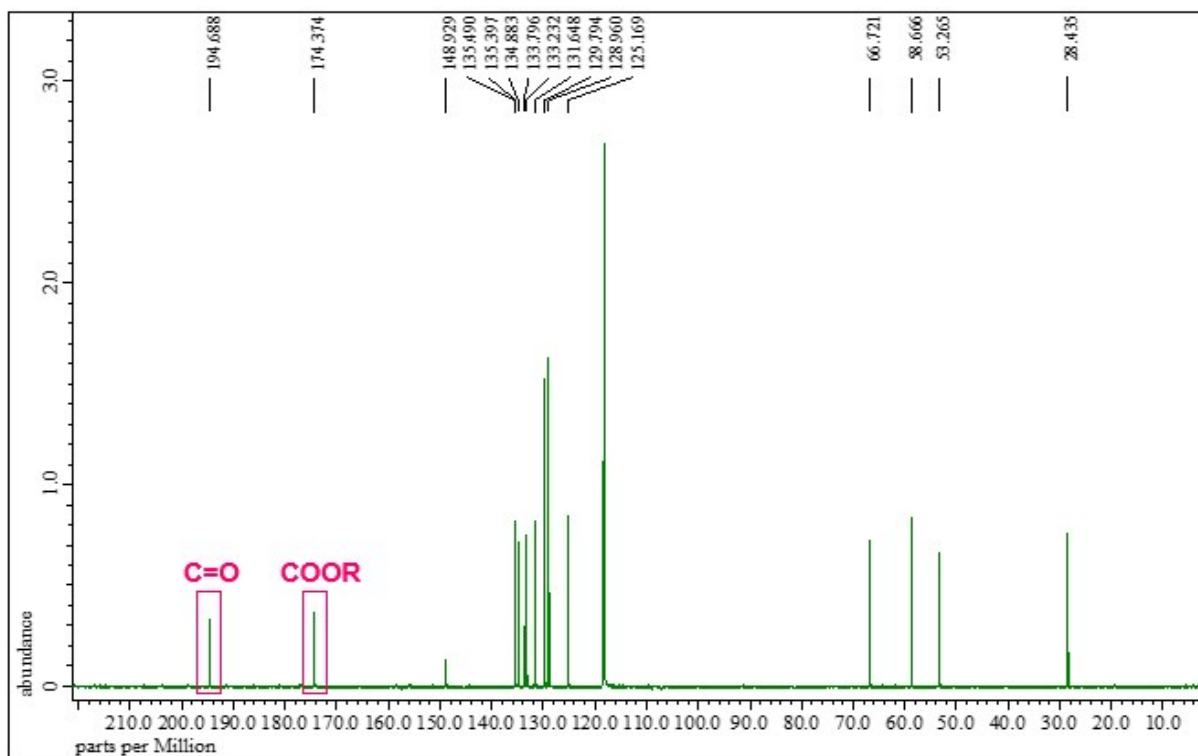

**Figure S4.**  $^{13}\text{C}\{^1\text{H}\}$  NMR spectrum of **5a** (126 MHz,  $\text{MeCN-}d_3$ )

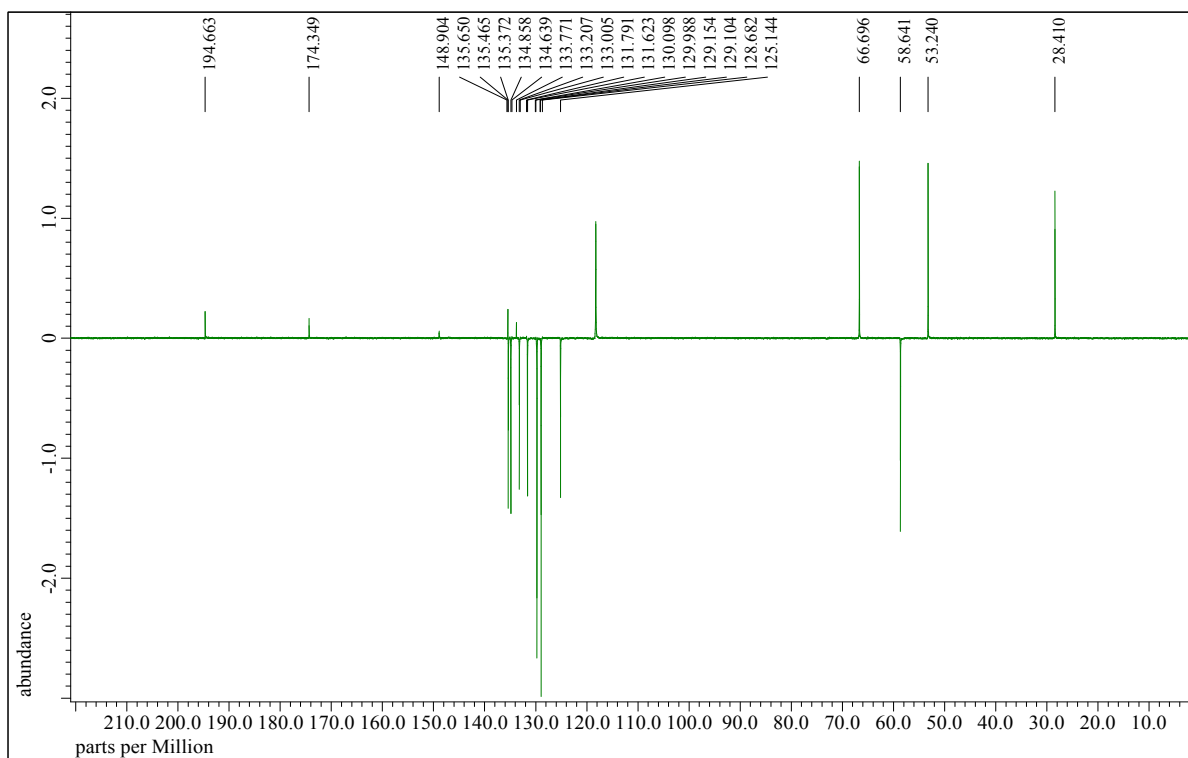

**Figure S5.** <sup>13</sup>C APT NMR spectrum of **5a** (126 MHz, MeCN-*d*<sub>3</sub>)

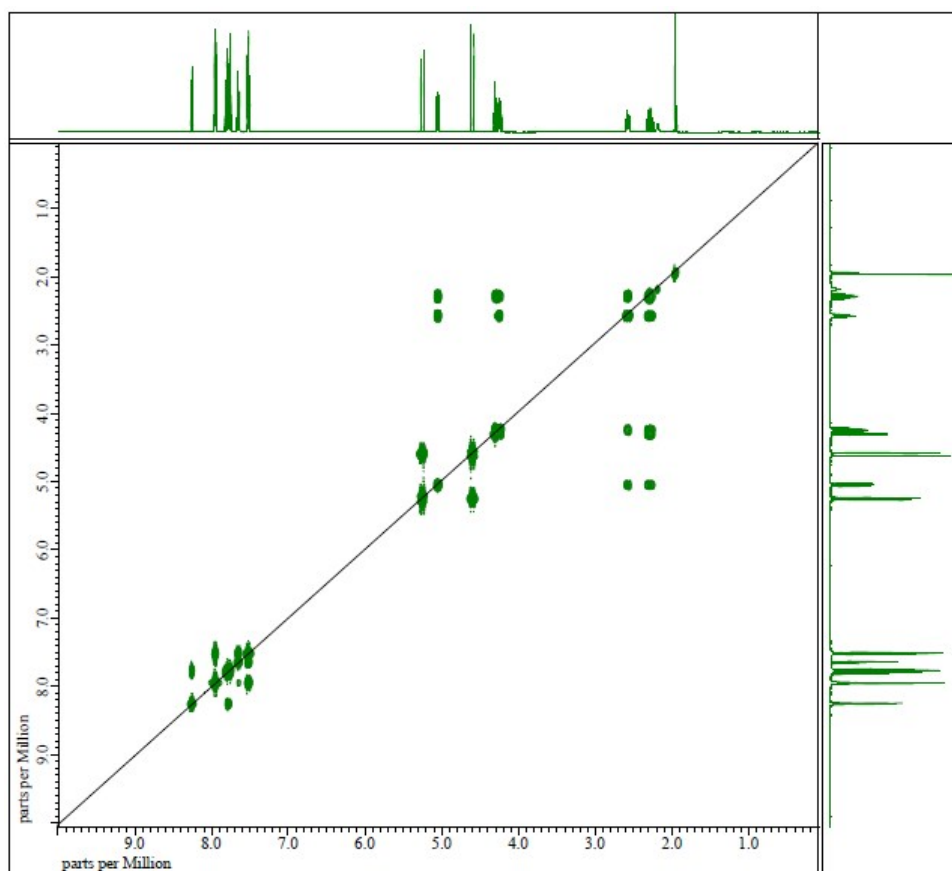

**Figure S6.** <sup>1</sup>H-<sup>1</sup>H COSY NMR spectrum of **5a** (500 MHz, MeCN-*d*<sub>3</sub>)

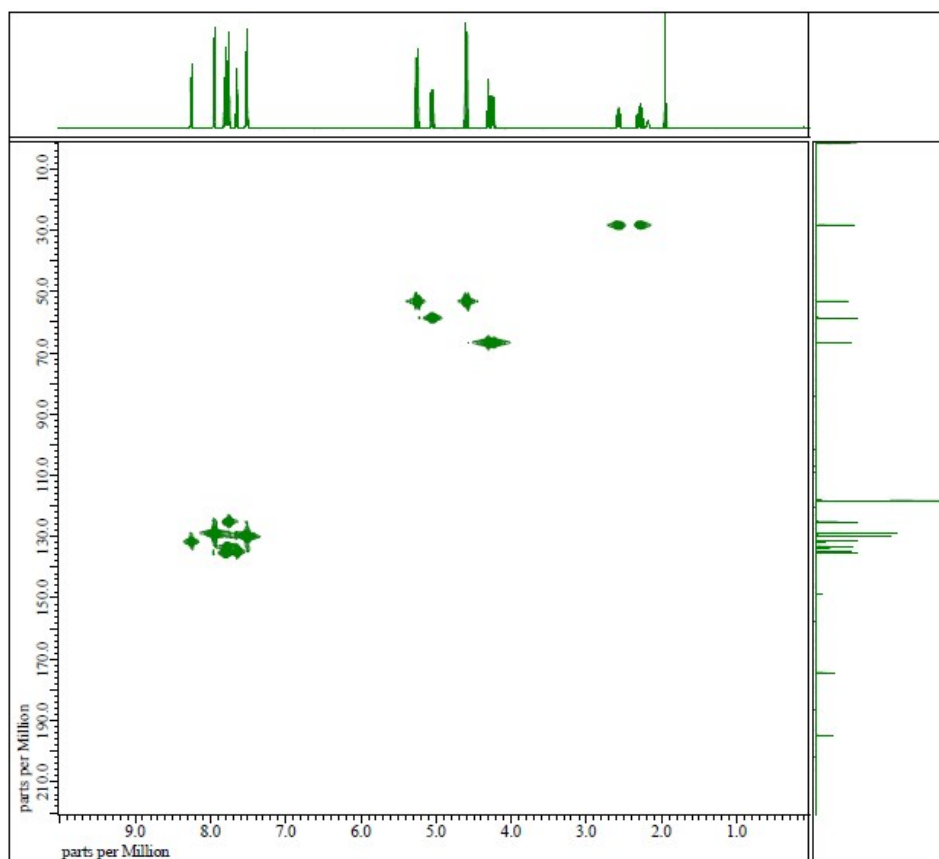

**Figure S7.**  $^1\text{H}$ - $^{13}\text{C}$  HMQC NMR spectrum of **5a** ( $\text{MeCN-}d_3$ )

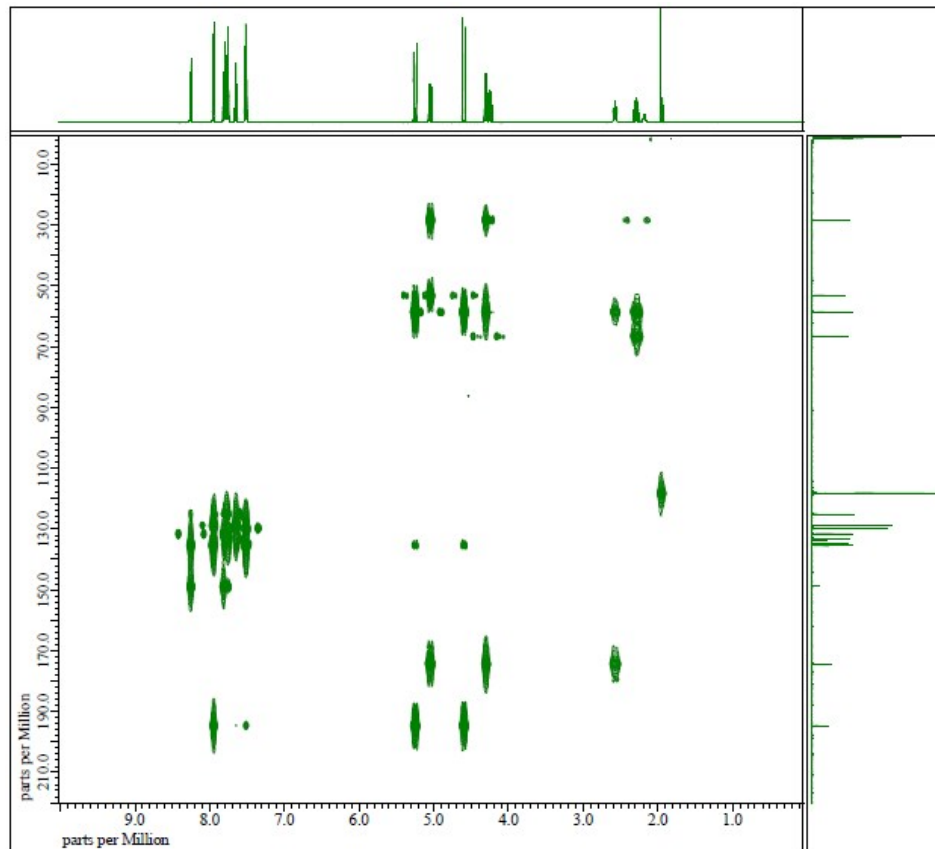

**Figure S8.**  $^1\text{H}$ - $^{13}\text{C}$  HMBC NMR spectrum of **5a** ( $\text{MeCN-}d_3$ )

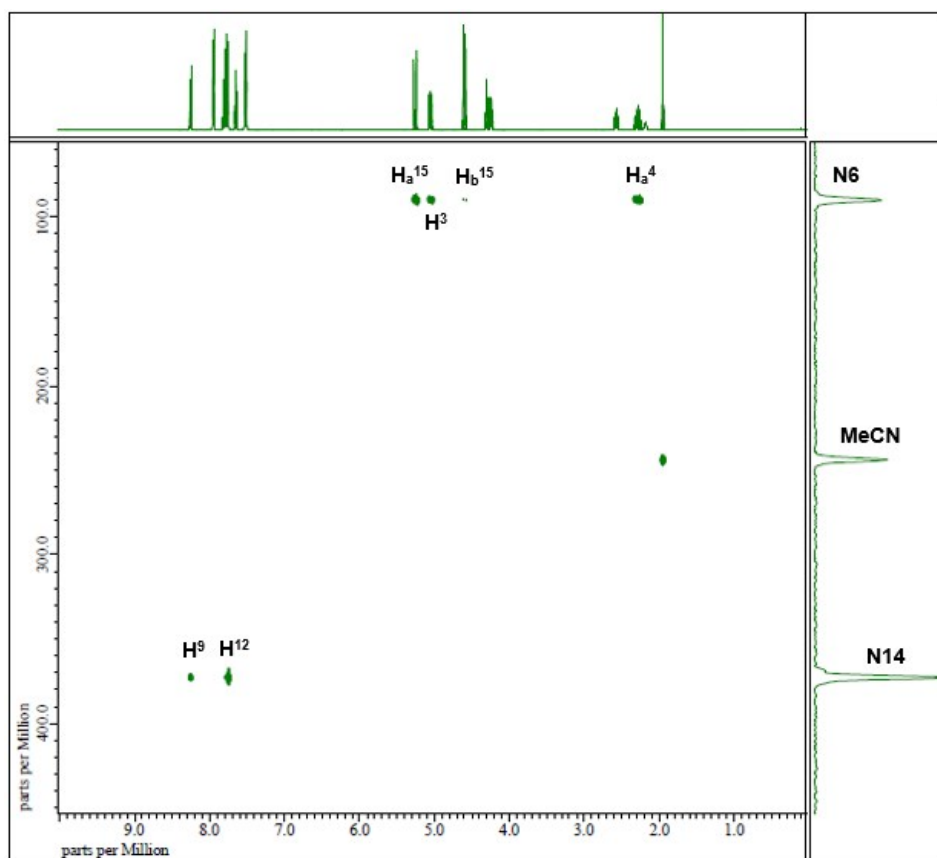

Figure S9.  $^1\text{H}$ - $^{15}\text{N}$  HMBC NMR spectrum of **5a** ( $\text{MeCN-}d_3$ )

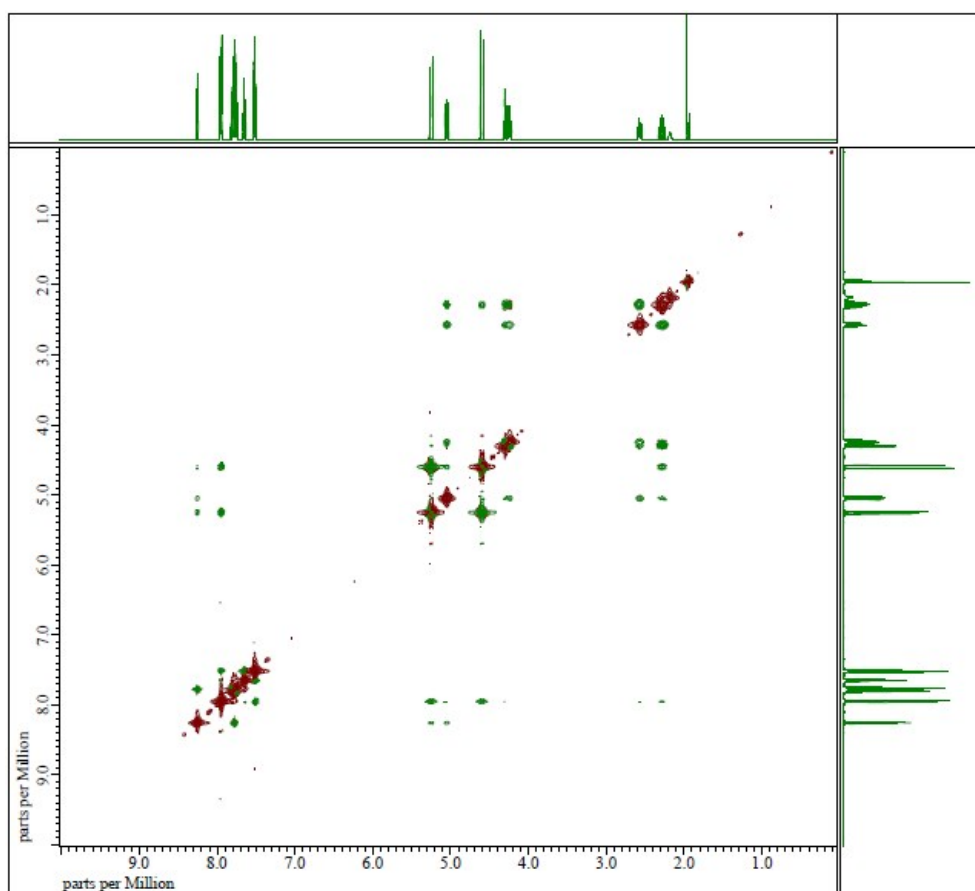

Figure S10.  $^1\text{H}$ - $^1\text{H}$  NOESY NMR spectrum of **5a** ( $\text{MeCN-}d_3$ )

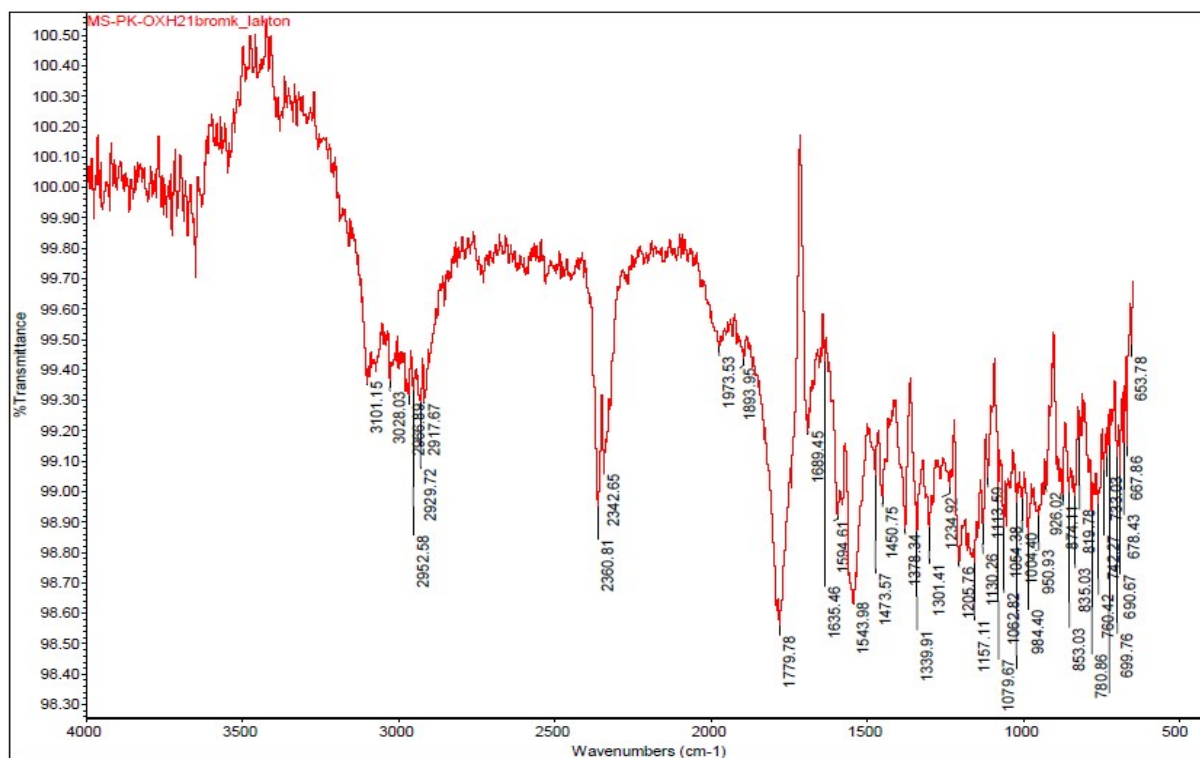

Figure S11. IR spectrum of 5a

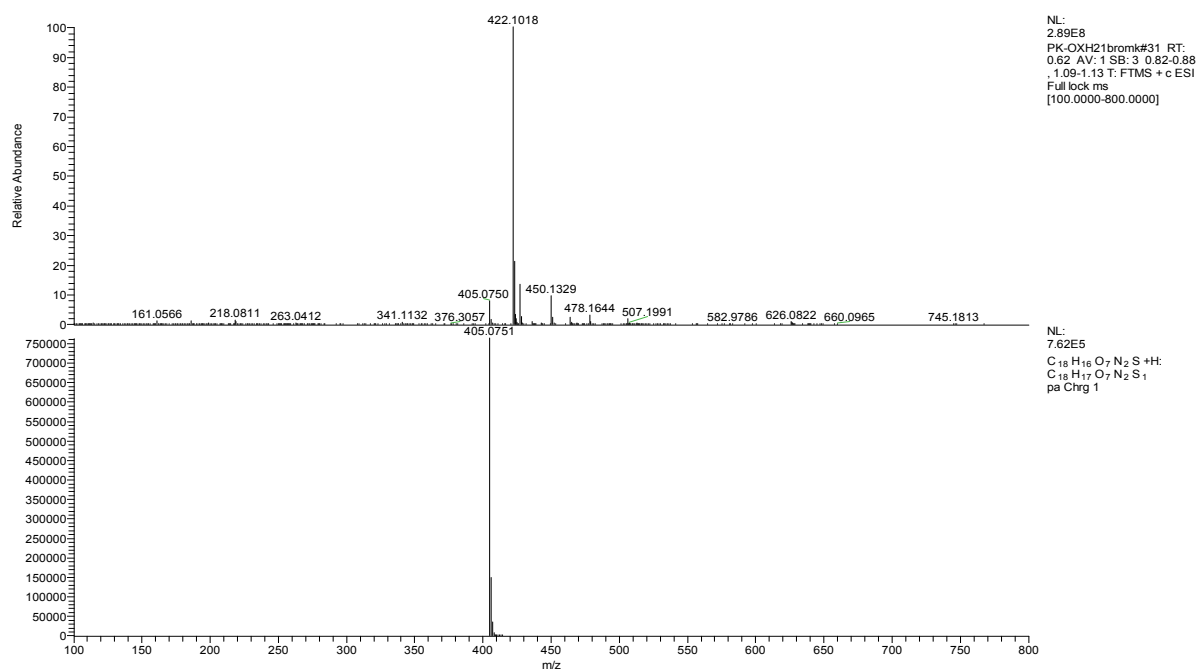

Figure S12. HRMS spectrum of 5a. Note: ion 422 belongs to the ammonium adduct originating from mobile phase.



**(-)-ammonium (2*R*,5*S*)-2-phenyl-4-tosyl-1,4-oxazepane-5-carboxylate **6g****

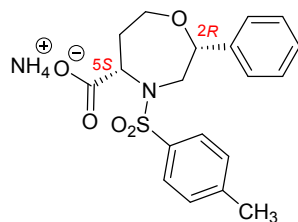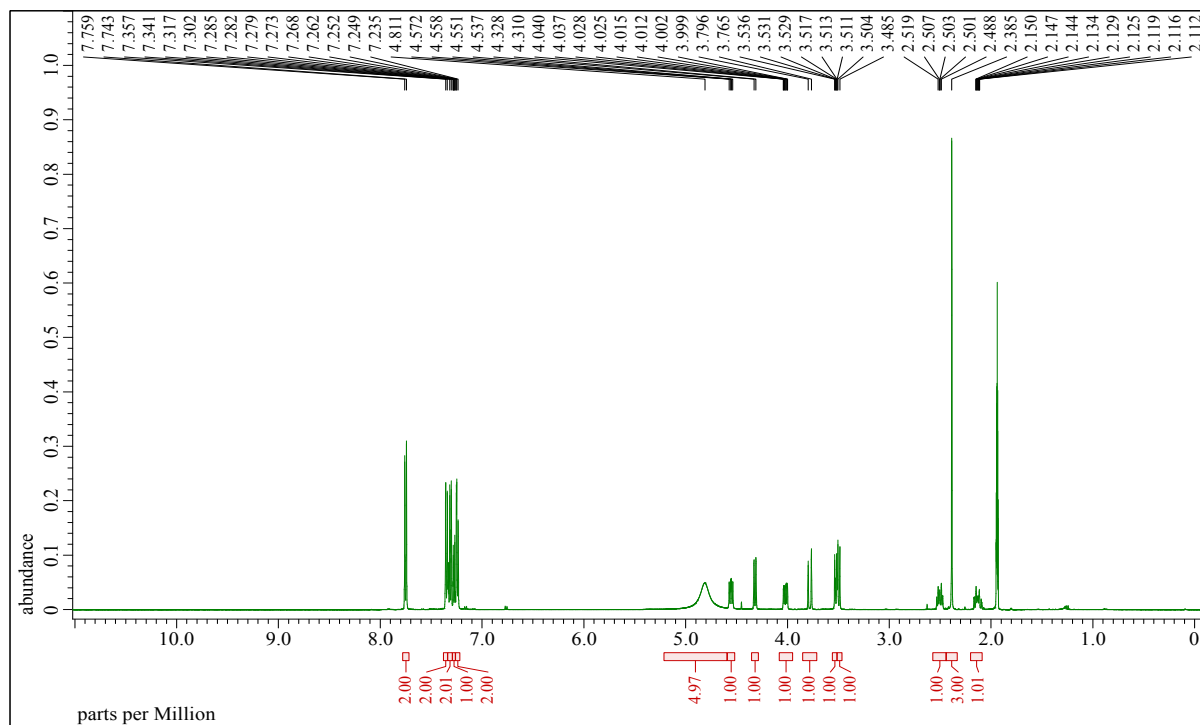

**Figure S13.**  $^1\text{H}$  NMR spectrum of **6g** (500 MHz,  $\text{MeCN-}d_3$ ). Note: The broad signal observed at 4.81 ppm represents ammonium ion and residual water.

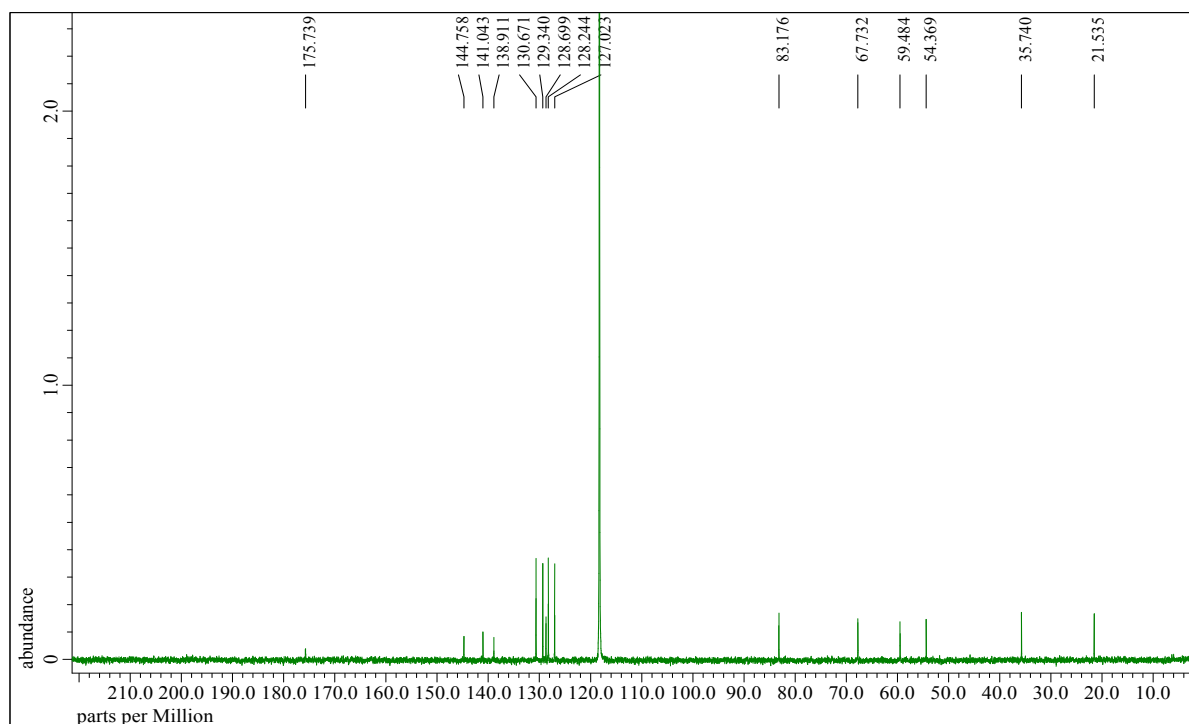

**Figure S14.**  $^{13}\text{C}\{^1\text{H}\}$  NMR spectrum of **6g** (126 MHz,  $\text{MeCN-}d_3$ )

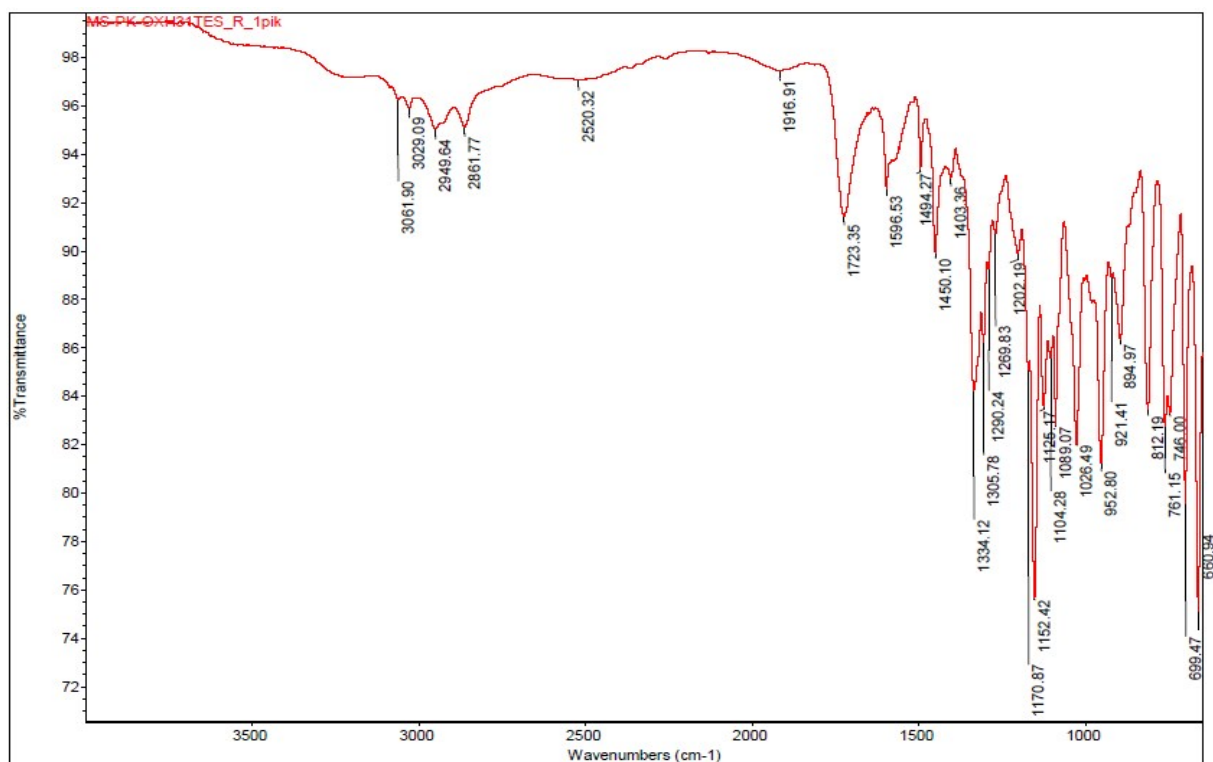

Figure S15. IR spectrum of 6g

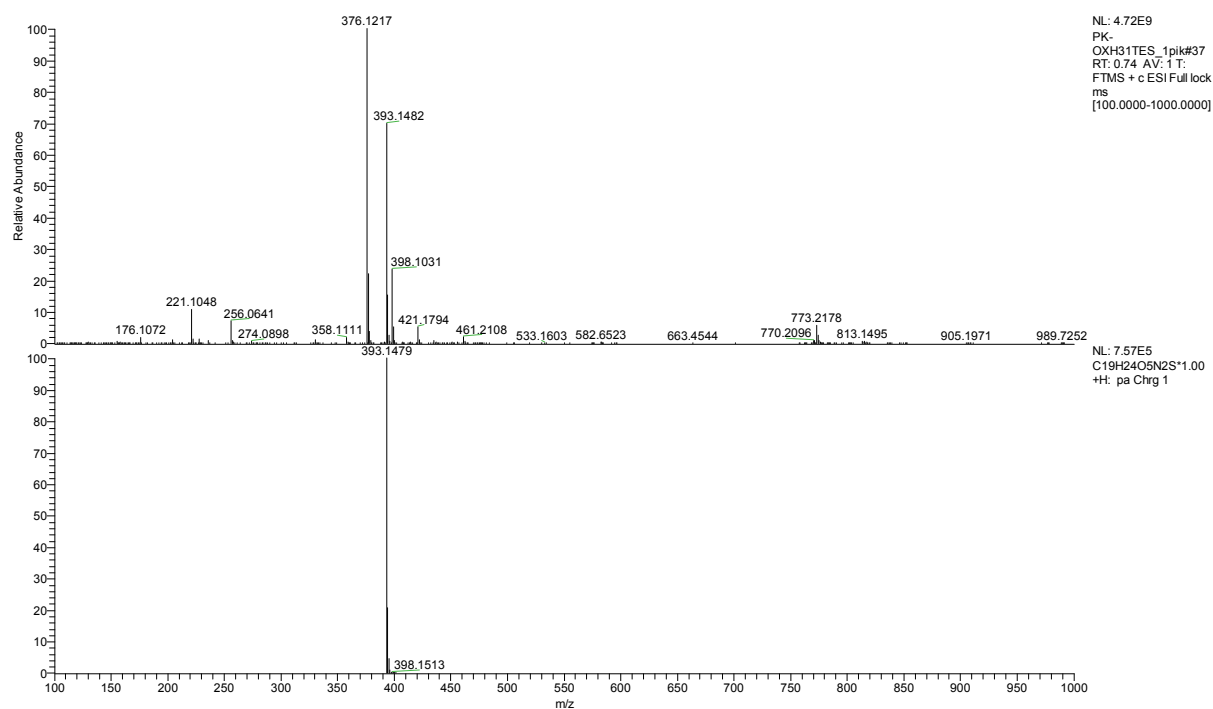

Figure S16. HRMS spectrum of 6g

**(-)-(2R,5S)-4-((2-aminophenyl)sulfonyl)-2-phenyl-1,4-oxazepane-5-carboxylic acid 7a**

The analytical data are identical for **7a** prepared from Wang resin or Wang-piperazine resin.

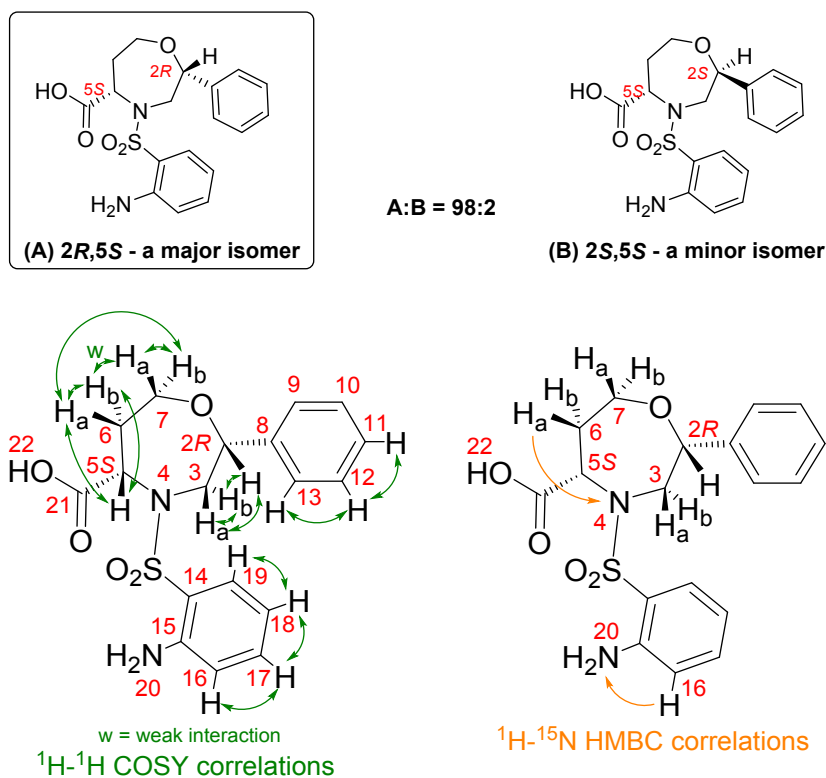

**Figure S17.** Detailed COSY and  $^1\text{H}$ - $^{15}\text{N}$  HMBC NMR analysis of 1,4-oxazepane **7a**

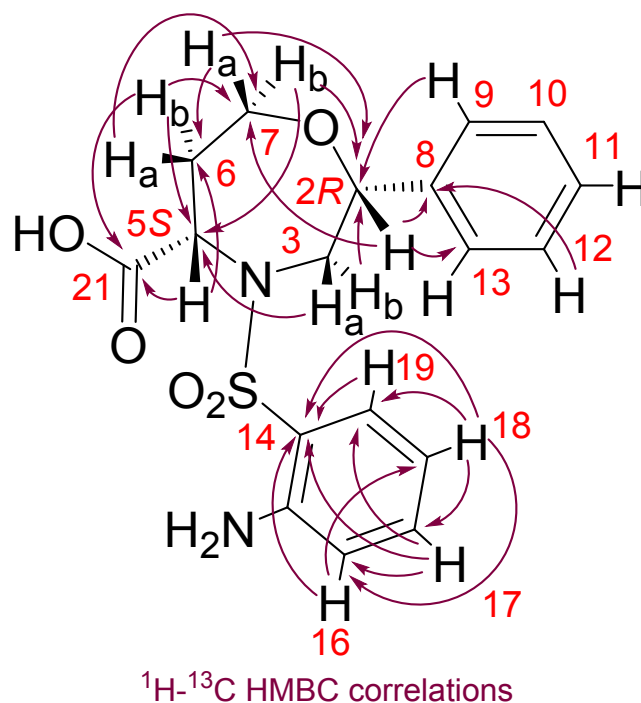

**Figure S18.** Detailed  $^1\text{H}$ - $^{13}\text{C}$  HMBC NMR analysis of 1,4-oxazepane **7a**

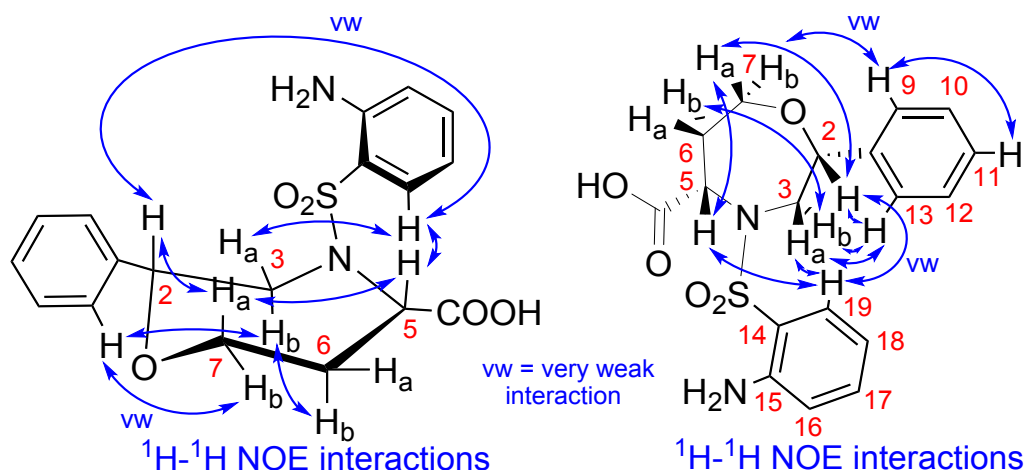

**Figure S19.** Detailed <sup>1</sup>H-<sup>1</sup>H NOE NMR analysis of 1,4-oxazepane **7a**

**Table S2.** <sup>1</sup>H NMR (500 MHz) and <sup>13</sup>C{<sup>1</sup>H} NMR (126 MHz) data, including detailed COSY, <sup>1</sup>H-<sup>13</sup>C HMBC and NOE correlations for 1,4-oxazepane **7a**<sup>a</sup>

| position     | <sup>1</sup> H NMR<br>$\delta_{\text{H}}$ [ppm] <sup>b</sup> | splitting pattern,<br>$J$ [Hz], integration   | <sup>13</sup> C{ <sup>1</sup> H}<br>NMR $\delta_{\text{C}}$<br>[ppm] | COSY<br>correlation<br>s                                                      | <sup>1</sup> H- <sup>13</sup> C HMBC<br>correlations | NOE<br>correlations                                                                                                             |
|--------------|--------------------------------------------------------------|-----------------------------------------------|----------------------------------------------------------------------|-------------------------------------------------------------------------------|------------------------------------------------------|---------------------------------------------------------------------------------------------------------------------------------|
| <b>2</b>     | 4.16                                                         | d, $J = 9.5$ Hz, 1H                           | 82.7                                                                 | H <sub>b</sub> <sup>3</sup>                                                   | 67.5, 127.1,<br>141.0                                | H <sub>a</sub> <sup>7</sup> , H <sup>9,13</sup> , H <sup>19</sup><br>(weak int.)                                                |
| <b>3</b>     | H <sub>a</sub> : 3.70                                        | d, $J = 16.1$ Hz, 1H,                         | 54.1                                                                 | H <sub>b</sub> <sup>3</sup>                                                   | 59.1                                                 | H <sup>9,13</sup> , H <sup>19</sup>                                                                                             |
|              | H <sub>b</sub> : 3.50                                        | dd, $J = 16.1, 9.5$ Hz,<br>1H                 |                                                                      | H <sup>2</sup> , H <sub>a</sub> <sup>3</sup>                                  | 59.1 (weak int.),<br>82.7                            | H <sub>b</sub> <sup>6</sup> , H <sup>9,13</sup>                                                                                 |
| <b>5</b>     | 4.66                                                         | dd, $J = 10.4, 7.1$ Hz,<br>1H                 | 59.1                                                                 | H <sub>a</sub> <sup>6</sup> , H <sub>b</sub> <sup>6</sup>                     | 35.6, 174.8                                          | H <sub>a</sub> <sup>7</sup> , H <sup>19</sup>                                                                                   |
| <b>6</b>     | H <sub>a</sub> : 2.54                                        | ddd, $J = 15.4, 7.1,$<br>6.3 Hz, 1H           | 35.6                                                                 | H <sup>5</sup> , H <sub>b</sub> <sup>6</sup> ,<br>H <sub>b</sub> <sup>7</sup> | 67.5                                                 | -                                                                                                                               |
|              | H <sub>b</sub> : 2.16                                        | dddd, $J = 15.4,$<br>10.4, 8.9, 1.1 Hz,<br>1H |                                                                      | H <sup>5</sup> , H <sub>a</sub> <sup>6</sup> ,<br>H <sub>a</sub> <sup>7</sup> | 59.1, 67.5,<br>174.8                                 | H <sub>b</sub> <sup>3</sup>                                                                                                     |
| <b>7</b>     | H <sub>a</sub> : 3.65                                        | dd, $J = 12.7, 8.9$ Hz,<br>1H                 | 67.5                                                                 | H <sub>b</sub> <sup>6</sup> , H <sub>b</sub> <sup>7</sup>                     | 35.6, 59.1,<br>82.7                                  | H <sup>2</sup> , H <sup>5</sup> ,                                                                                               |
|              | H <sub>b</sub> : 4.02                                        | ddd, $J = 12.7, 6.3,$<br>1.1 Hz, 1H           |                                                                      | H <sub>a</sub> <sup>6</sup> , H <sub>a</sub> <sup>7</sup>                     | 59.1, 82.7                                           | H <sup>9,13</sup> (very weak<br>int.)                                                                                           |
| <b>8</b>     | -                                                            | -                                             | 141.0                                                                | -                                                                             | -                                                    | -                                                                                                                               |
| <b>9,13</b>  | 7.15                                                         | m, 2H                                         | 127.1                                                                | H <sup>10,12</sup>                                                            | 82.7, 128.7,<br>129.3                                | H <sup>2</sup> , H <sub>a</sub> <sup>3</sup> , H <sub>b</sub> <sup>3</sup> ,<br>H <sub>b</sub> <sup>7</sup> (very weak<br>int.) |
| <b>10,12</b> | 7.27-7.31                                                    | m, 2H                                         | 129.3                                                                | H <sup>9,13</sup> , H <sup>11</sup>                                           | 127.1, 128.7,<br>141.0                               | -                                                                                                                               |
| <b>11</b>    | 7.23-7.27                                                    | m, 1H                                         | 128.7                                                                | H <sup>10,12</sup>                                                            | 127.1, 129.3                                         | -                                                                                                                               |
| <b>14</b>    | -                                                            | -                                             | 121.9                                                                | -                                                                             | -                                                    | -                                                                                                                               |
| <b>15</b>    | -                                                            | -                                             | 147.5                                                                | -                                                                             | -                                                    | -                                                                                                                               |
| <b>16</b>    | 6.84                                                         | dd, $J = 8.3, 1.0$ Hz,<br>1H                  | 118.6                                                                | H <sup>17</sup>                                                               | 117.7, 121.9                                         | -                                                                                                                               |
| <b>17</b>    | 7.34                                                         | ddd, $J = 8.3, 7.2,$<br>1.5 Hz, 1H            | 135.4                                                                | H <sup>16</sup> , H <sup>18</sup> ,                                           | 118.6, 131.0,<br>147.5                               | -                                                                                                                               |
| <b>18</b>    | 6.75                                                         | ddd, $J = 8.1, 7.2,$<br>1.0 Hz, 1H            | 117.7                                                                | H <sup>17</sup> , H <sup>19</sup>                                             | 121.9, 131.0,<br>135.4                               | -                                                                                                                               |
| <b>19</b>    | 7.66                                                         | dd, $J = 8.1, 1.5$ Hz,<br>1H                  | 131.0                                                                | H <sup>18</sup>                                                               | 135.4, 147.5                                         | H <sup>2</sup> (very weak<br>int.), H <sub>a</sub> <sup>3</sup> , H <sup>5</sup>                                                |
| <b>21</b>    | -                                                            | -                                             | 174.8                                                                | -                                                                             | -                                                    | -                                                                                                                               |

<sup>a</sup>Assignments are based on extensive 1D and 2D NMR analysis (<sup>1</sup>H-<sup>1</sup>H COSY, <sup>1</sup>H-<sup>13</sup>C HMQC, <sup>1</sup>H-<sup>13</sup>C HMBC and <sup>1</sup>H-<sup>1</sup>H NOESY); measured in MeCN-*d*<sub>3</sub>; int. = interaction.

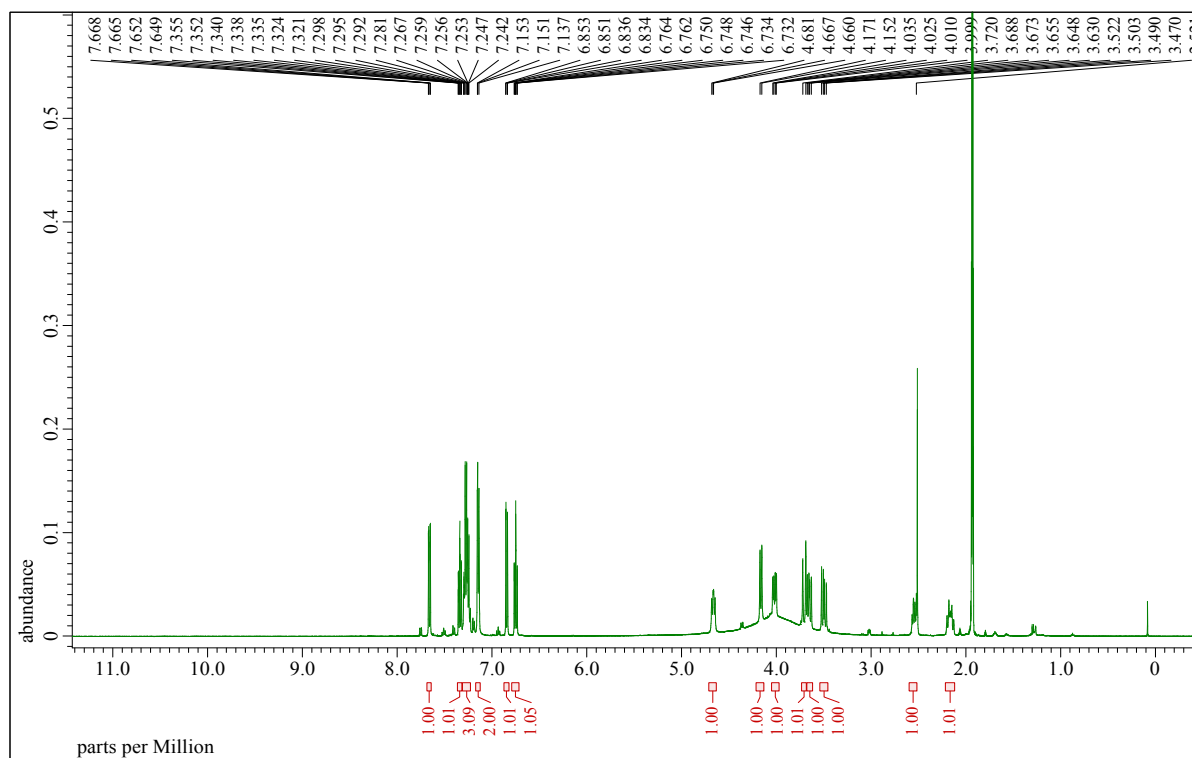

Figure S20.  $^1\text{H}$  NMR spectrum of **7a** (500 MHz,  $\text{MeCN-}d_3$ )

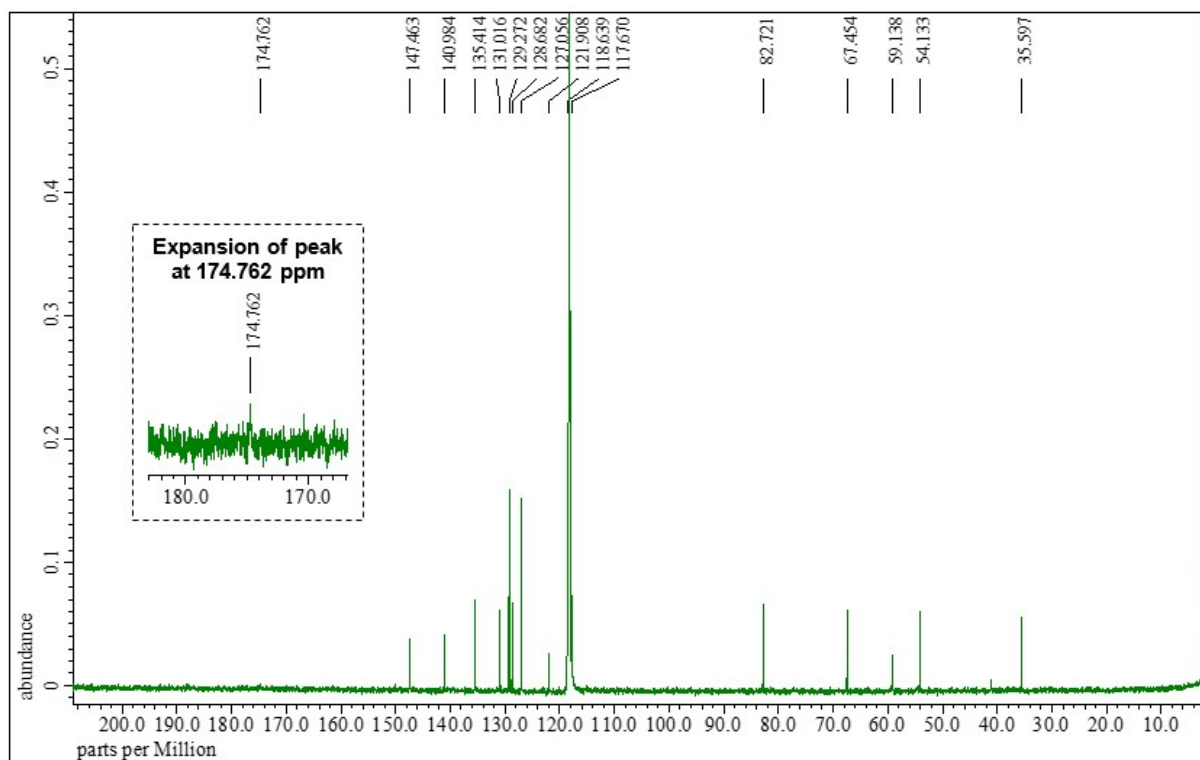

Figure S21.  $^{13}\text{C}\{^1\text{H}\}$  NMR spectrum of **7a** (126 MHz,  $\text{MeCN-}d_3$ )

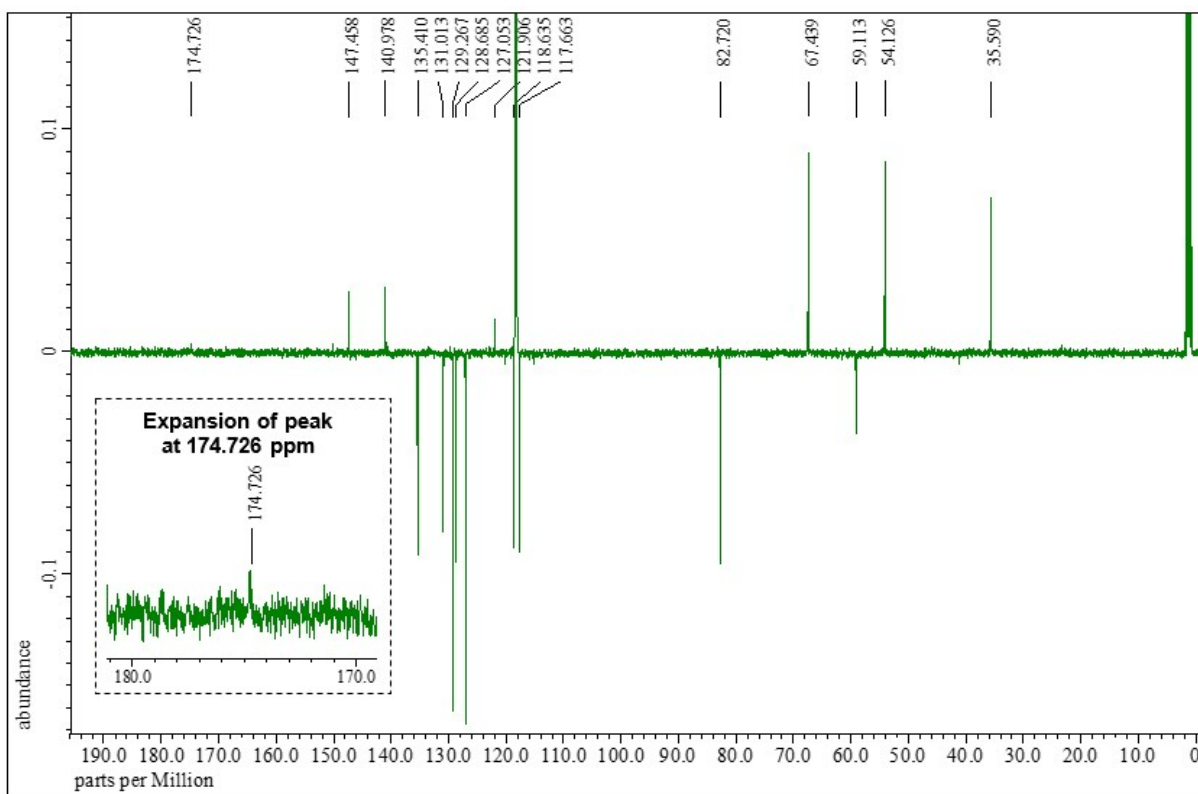

Figure S22.  $^{13}\text{C}$  APT NMR spectrum of **7a** (126 MHz,  $\text{MeCN-}d_3$ )

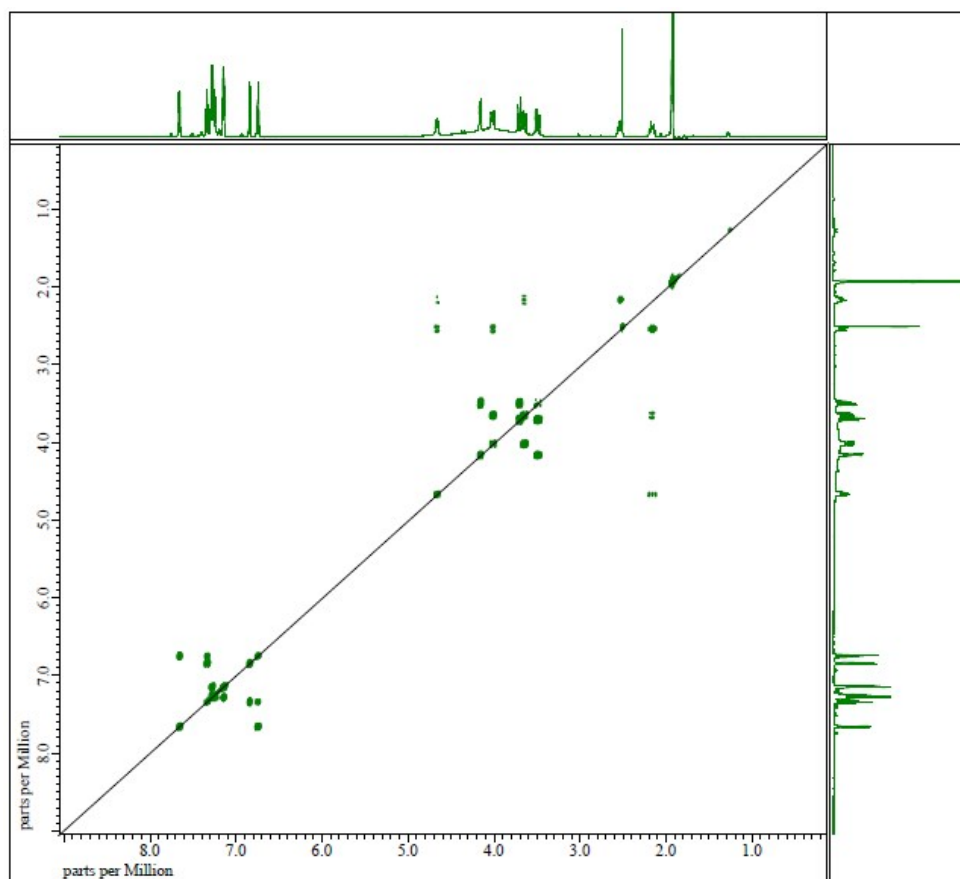

Figure S23.  $^1\text{H-}^1\text{H}$  COSY NMR spectrum of **7a** (500 MHz,  $\text{MeCN-}d_3$ )

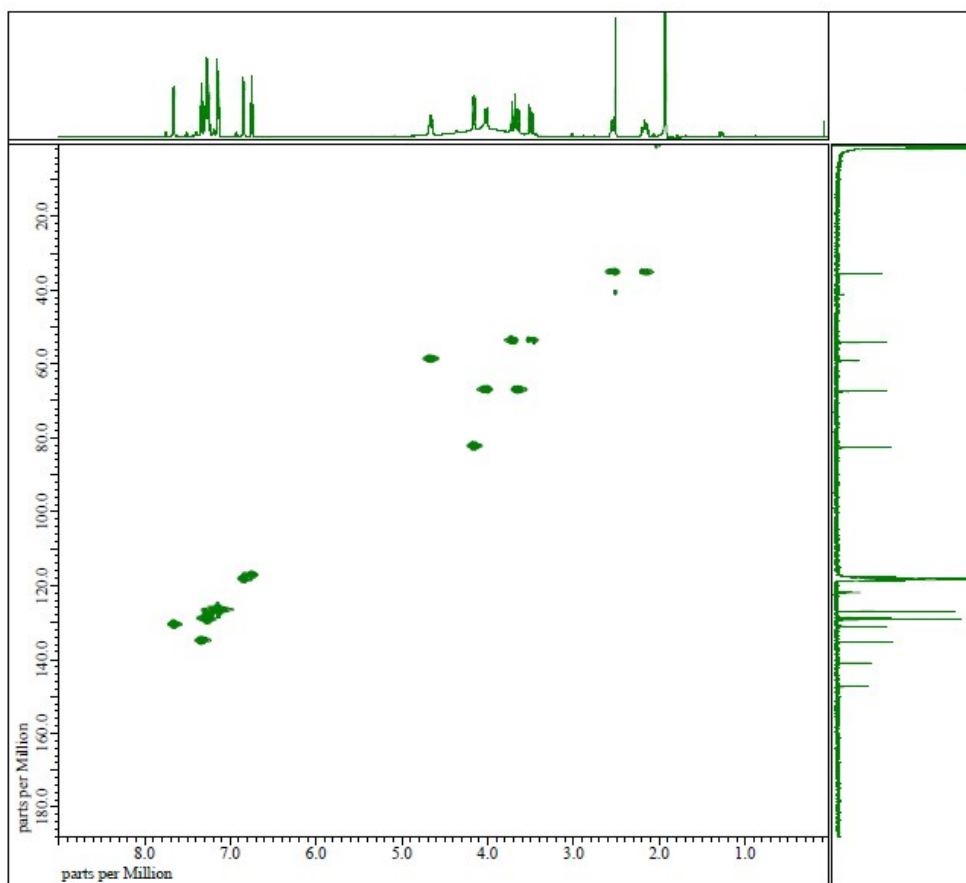

Figure S24.  $^1\text{H}$ - $^{13}\text{C}$  HMQC NMR spectrum of **7a** ( $\text{MeCN-}d_3$ )

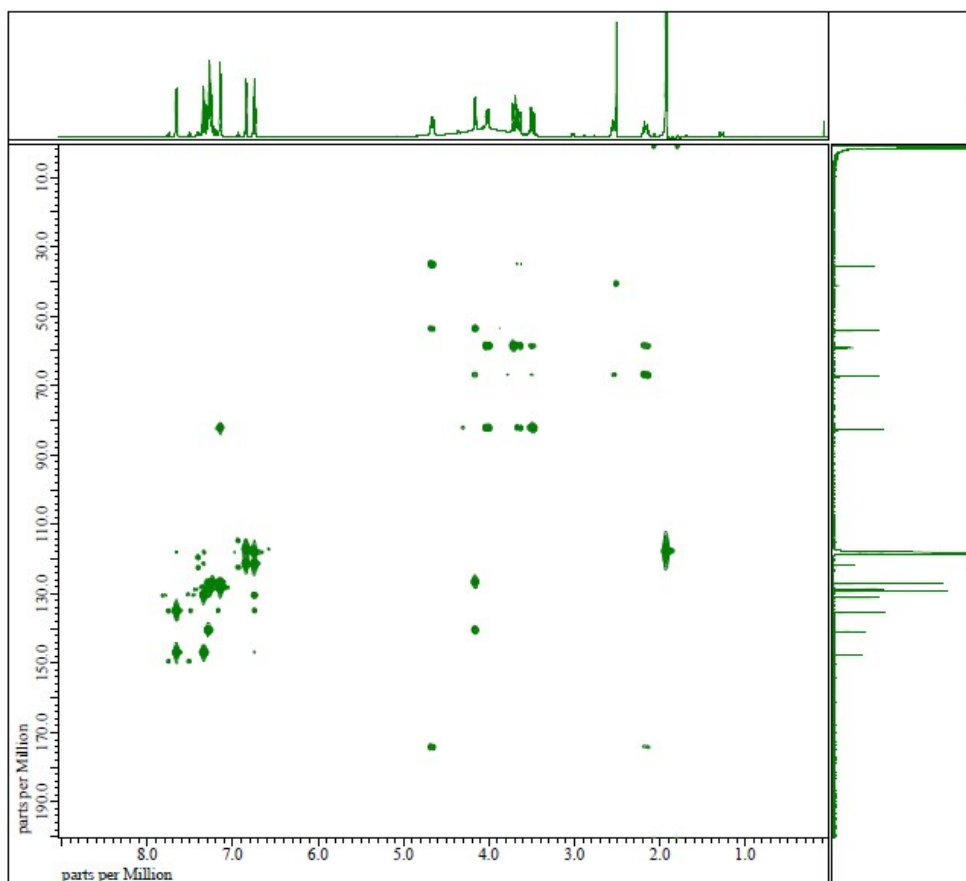

Figure S25.  $^1\text{H}$ - $^{13}\text{C}$  HMBC NMR spectrum of **7a** ( $\text{MeCN-}d_3$ )

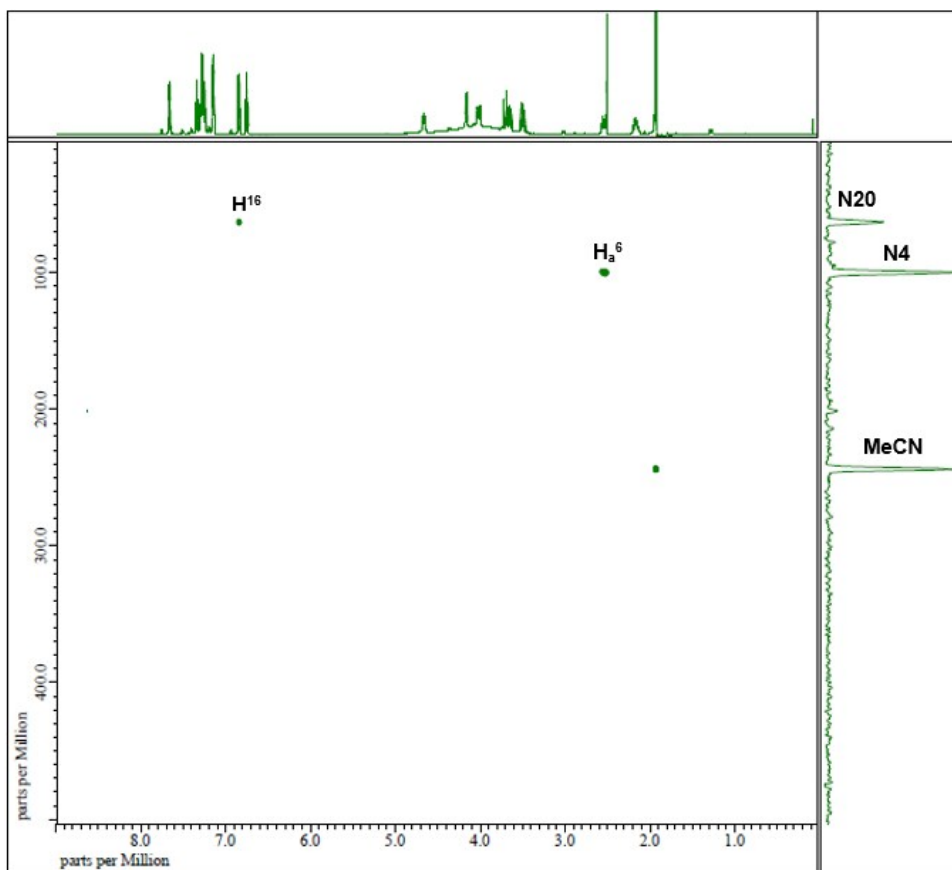

Figure S26.  $^1\text{H}$ - $^{15}\text{N}$  HMBC NMR spectrum of **7a** ( $\text{MeCN-}d_3$ )

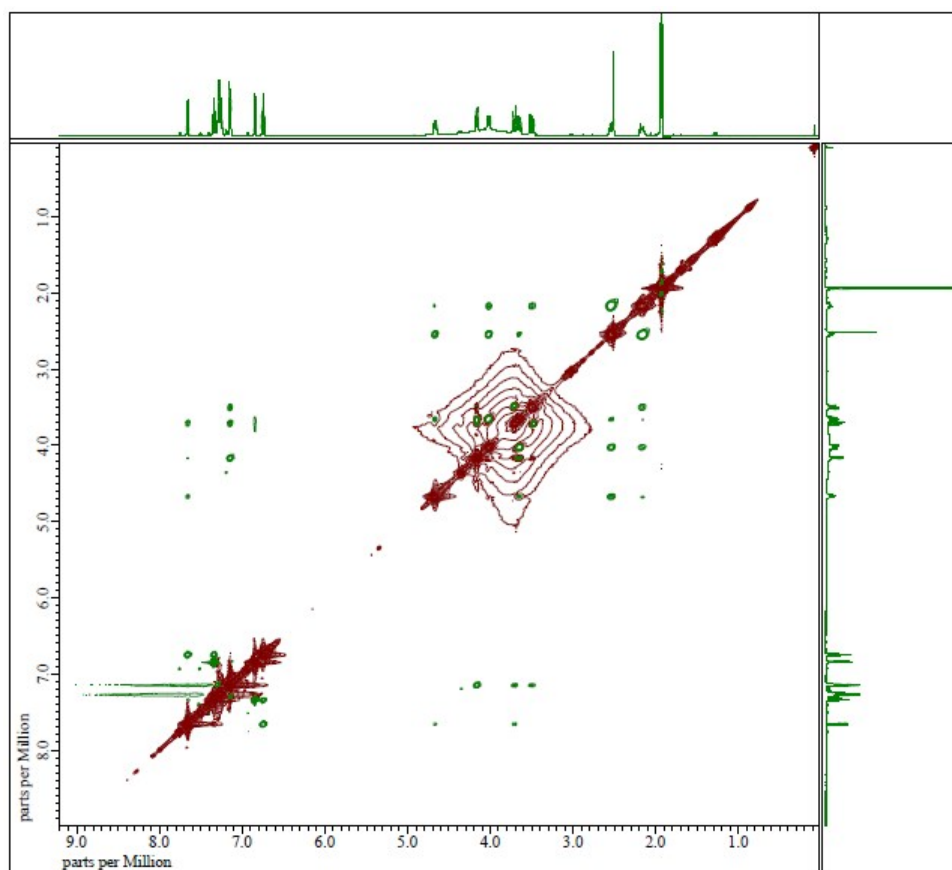

Figure S27.  $^1\text{H}$ - $^1\text{H}$  NOESY NMR spectrum of **7a** ( $\text{MeCN-}d_3$ )



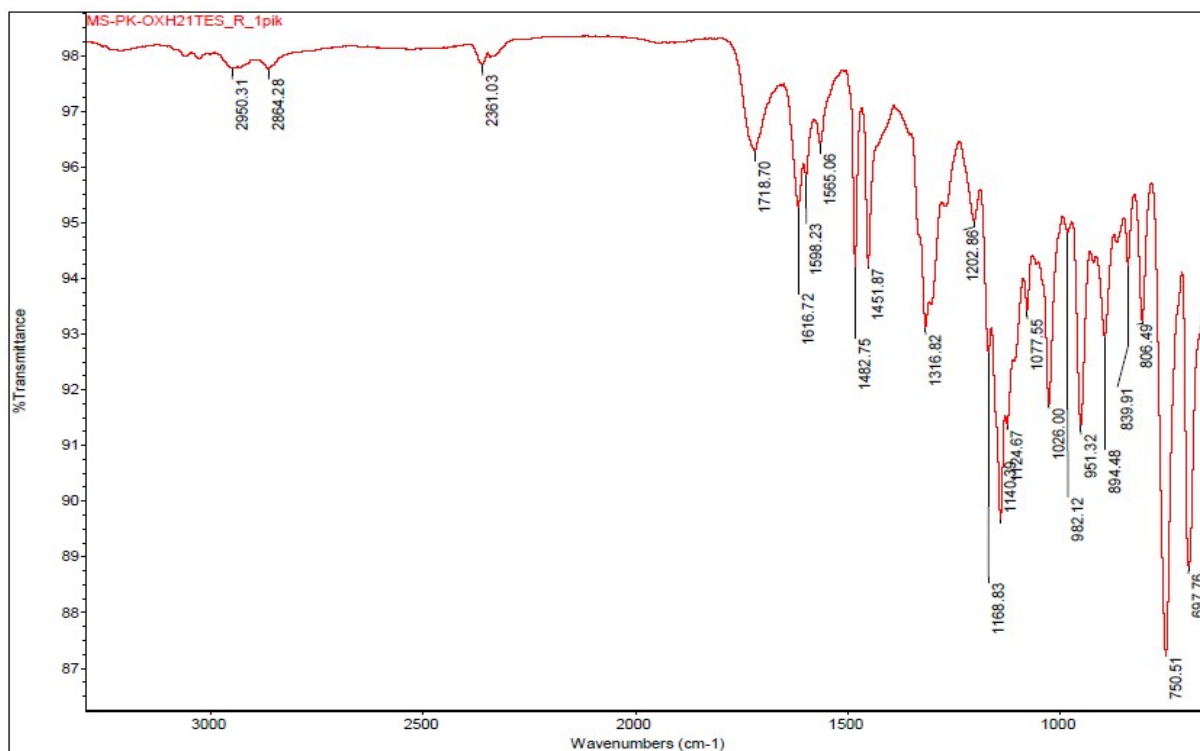

Figure S28. IR spectrum of 7a

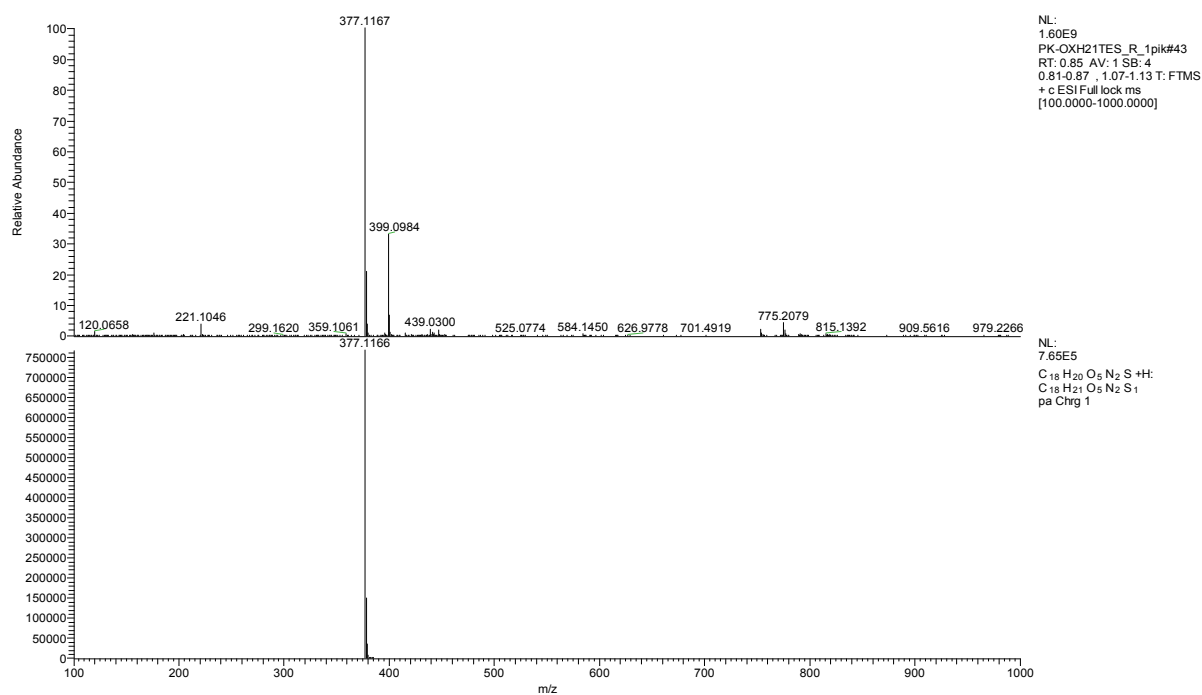

Figure S29. HRMS spectrum of 7a

**(-)-(2R,5S)-4-((2-aminophenyl)sulfonyl)-2-phenyl-1,4-oxazepane-5-carboxamide 7b<sup>2R</sup>**

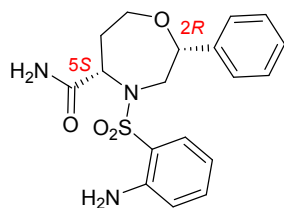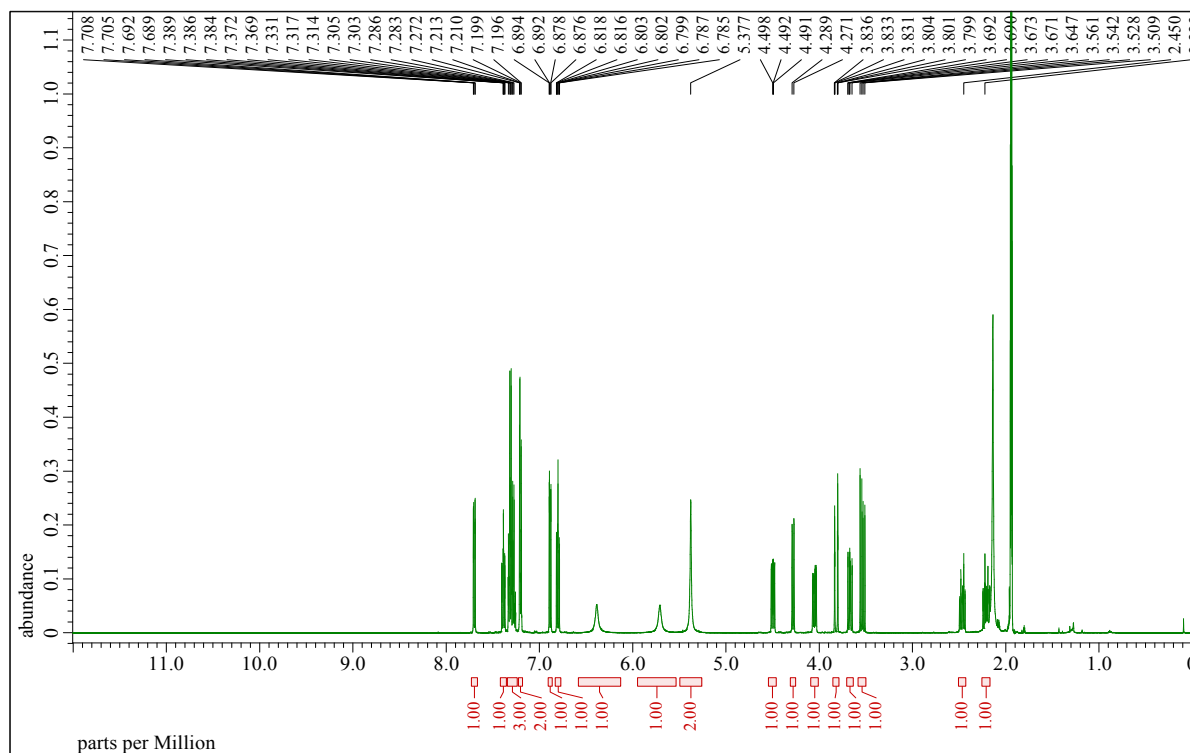

**Figure S30.** <sup>1</sup>H NMR spectrum of **7b<sup>2R</sup>** (500 MHz, MeCN-*d*<sub>3</sub>)

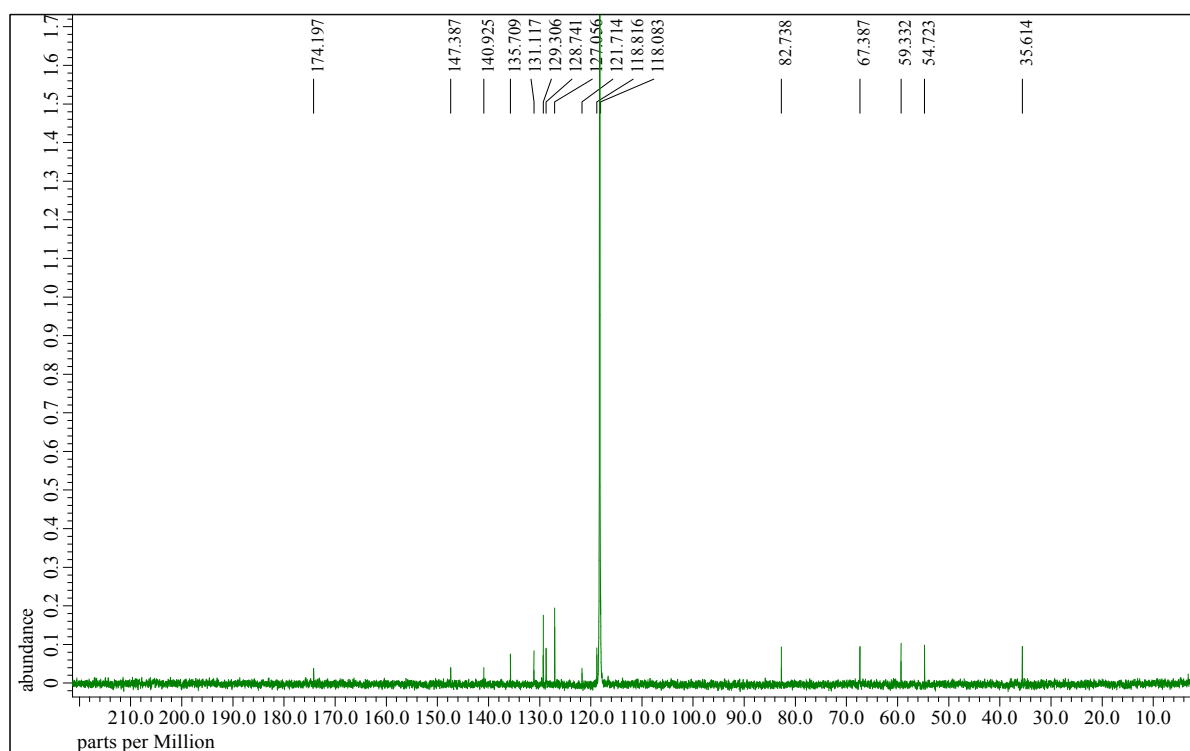

**Figure S31.** <sup>13</sup>C{<sup>1</sup>H} NMR spectrum of **7b<sup>2R</sup>** (126 MHz, MeCN-*d*<sub>3</sub>)

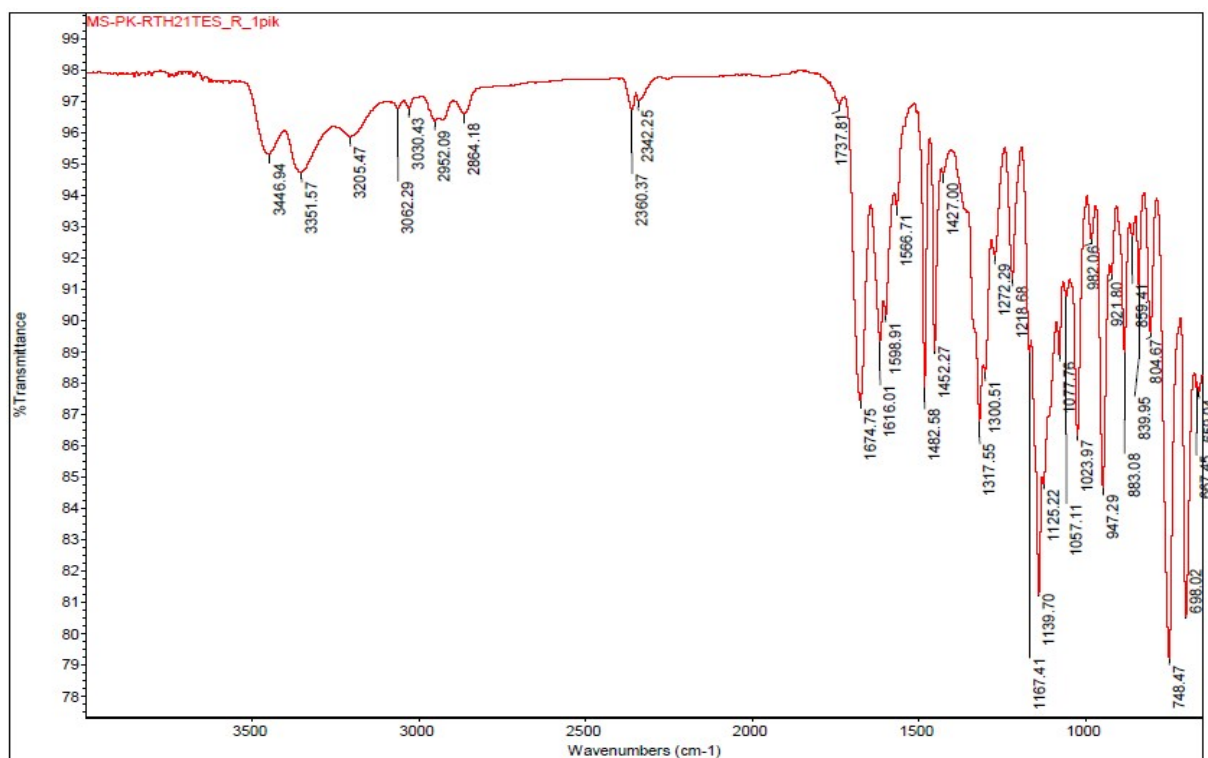

Figure S32. IR spectrum of **7b<sup>2R</sup>**

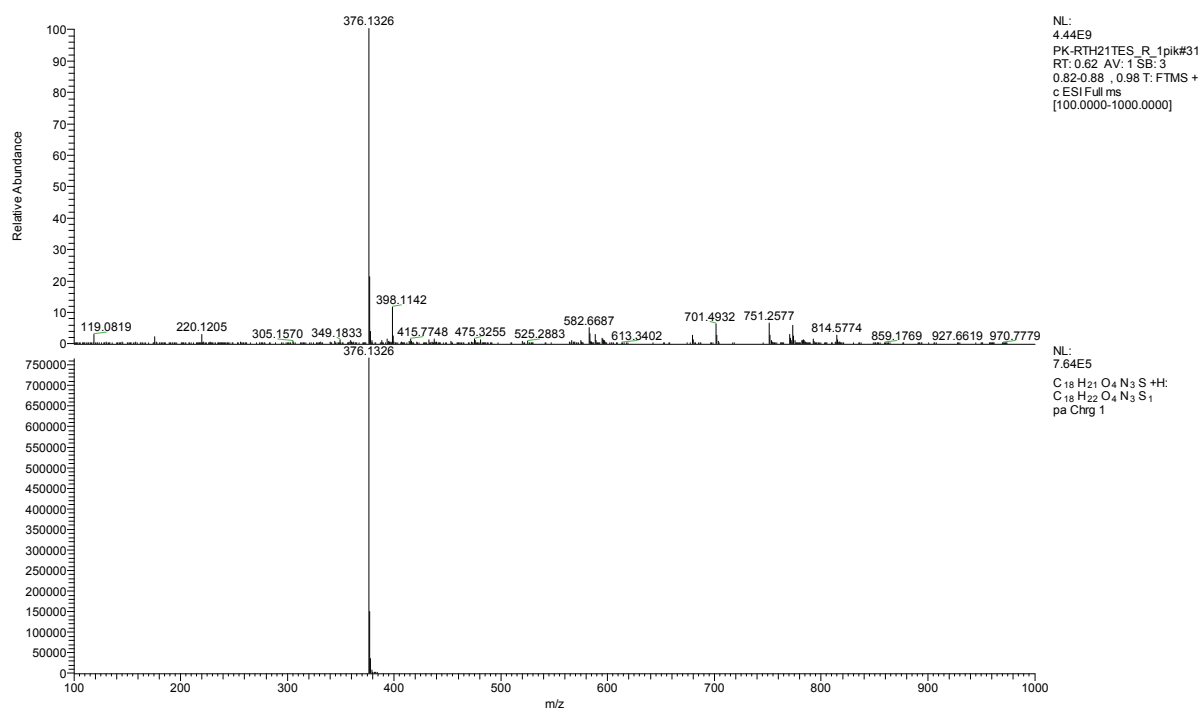

Figure S33. HRMS spectrum of **7b<sup>2R</sup>**

**(+)-(2*S*,5*S*)-4-((2-aminophenyl)sulfonyl)-2-phenyl-1,4-oxazepane-5-carboxamide **7b**<sup>2*S*</sup>**

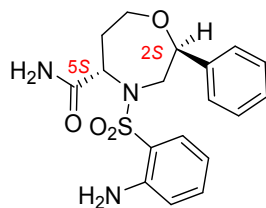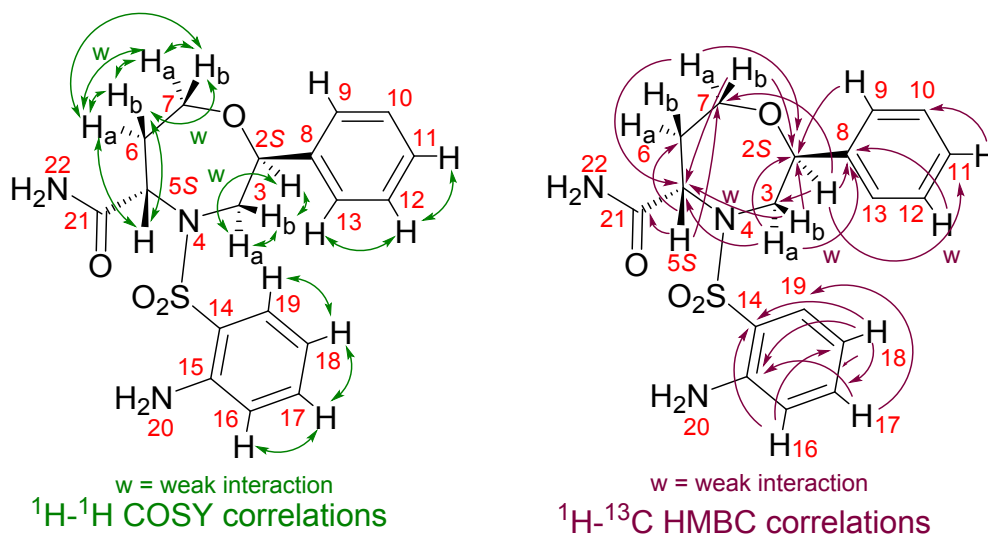

**Figure S34.** Detailed COSY and <sup>1</sup>H-<sup>13</sup>C HMBC NMR analysis of 1,4-oxazepane **7b**<sup>2*S*</sup>

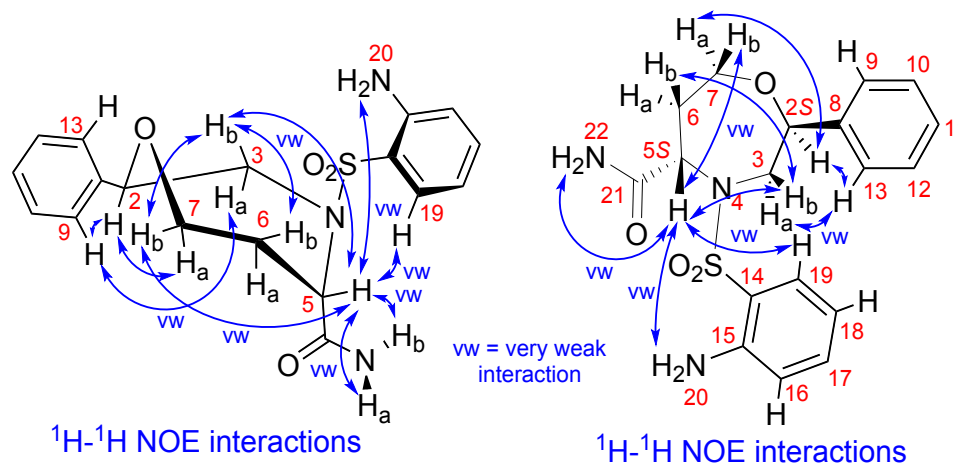

**Figure S35.** Detailed <sup>1</sup>H-<sup>1</sup>H NOE NMR analysis of 1,4-oxazepane **7b**<sup>2*S*</sup>

**Table S3.**  $^1\text{H}$  NMR (500 MHz) and  $^{13}\text{C}\{^1\text{H}\}$  NMR (126 MHz) spectral data, including detailed COSY,  $^1\text{H}$ - $^{13}\text{C}$  HMBC and NOE correlations for 1,4-oxazepane **7b**<sup>2Sa</sup>

| position | $^1\text{H}$ NMR $\delta_{\text{H}}$ [ppm] <sup>b</sup> | splitting pattern, $J$ [Hz], integration | $^{13}\text{C}\{^1\text{H}\}$ NMR $\delta_{\text{C}}$ [ppm] | COSY correlations                                                    | $^1\text{H}$ - $^{13}\text{C}$ HMBC correlations | NOE correlations                                                                                                                 |
|----------|---------------------------------------------------------|------------------------------------------|-------------------------------------------------------------|----------------------------------------------------------------------|--------------------------------------------------|----------------------------------------------------------------------------------------------------------------------------------|
| 2        | 4.64                                                    | dd, $J = 8.7, 1.6$ Hz, 1H                | 81.4                                                        | $\text{H}_a^3, \text{H}_b^3$                                         | 56.8, 126.6, 128.6 (weak int.), 141.9            | $\text{H}_a^7, \text{H}^{9,13}$                                                                                                  |
| 3        | $\text{H}_a$ : 3.63                                     | dd, $J = 14.2, 1.6$ Hz, 1H,              | 56.8                                                        | $\text{H}^2, \text{H}_b^3$                                           | 59.4, 81.4                                       | $\text{H}^{9,13}$ (very weak int.)                                                                                               |
|          | $\text{H}_b$ : 3.43                                     | dd, $J = 14.2, 8.7$ Hz, 1H               |                                                             | $\text{H}^2, \text{H}_a^3$                                           | 59.4 (weak int.), 81.4, 141.9 (weak int.)        | $\text{H}^5, \text{H}_b^6$                                                                                                       |
| 5        | 4.59                                                    | dd, $J = 4.5, 4.5$ Hz, 1H                | 59.4                                                        | $\text{H}_a^6, \text{H}_b^6$                                         | 33.0 (weak int.), 66.9, 174.3                    | $\text{H}_b^3, \text{H}_b^7$ (very weak int.), $\text{H}^{19}$ (very weak int.), $\text{H}^{20}, \text{H}^{22}$ (very weak int.) |
| 6        | $\text{H}_a$ : 2.30                                     | dddd, $J = 15.8, 4.9, 4.5, 1.6$ Hz, 1H   | 33.0                                                        | $\text{H}^5, \text{H}_b^6, \text{H}_a^7$ (weak int.), $\text{H}_b^7$ | -                                                | -                                                                                                                                |
|          | $\text{H}_b$ : 2.10                                     | dddd, $J = 15.8, 11.0, 4.5, 3.0$ Hz, 1H  |                                                             | $\text{H}^5, \text{H}_a^6, \text{H}_a^7, \text{H}_b^7$ (weak int.)   | -                                                | $\text{H}_b^3$                                                                                                                   |
| 7        | $\text{H}_a$ : 3.78                                     | ddd, $J = 12.8, 11.0, 1.6$ Hz, 1H        | 67.0                                                        | $\text{H}_a^6$ (weak int.), $\text{H}_b^6, \text{H}_b^7$             | 59.4, 81.4                                       | $\text{H}^2$                                                                                                                     |
|          | $\text{H}_b$ : 3.94                                     | ddd, $J = 12.8, 4.5, 3.0$ Hz, 1H         |                                                             | $\text{H}_a^6, \text{H}_b^6$ (weak int.), $\text{H}_a^7$             | 59.4, 81.4                                       | $\text{H}^5$ (very weak int.)                                                                                                    |
| 8        | -                                                       | -                                        | 141.9                                                       | -                                                                    | -                                                | -                                                                                                                                |
| 9,13     | 7.18-7.19                                               | m, 2H                                    | 126.6                                                       | $\text{H}^{10,12}$                                                   | 81.4, 128.6                                      | $\text{H}^2, \text{H}_a^3$ (weak int.)                                                                                           |
| 10,12    | 7.27-7.30                                               | m, 2H                                    | 129.3                                                       | $\text{H}^{9,13}, \text{H}^{11}$                                     | 141.9                                            | -                                                                                                                                |
| 11       | 7.24-7.27                                               | m, 1H                                    | 128.6                                                       | $\text{H}^{10,12}$                                                   | 126.6, 129.3                                     | -                                                                                                                                |
| 14       | -                                                       | -                                        | 119.1                                                       | -                                                                    | -                                                | -                                                                                                                                |
| 15       | -                                                       | -                                        | 148.0                                                       | -                                                                    | -                                                | -                                                                                                                                |
| 16       | 6.85                                                    | dd, $J = 8.5, 1.1$ Hz, 1H                | 118.7                                                       | $\text{H}^{17}$                                                      | 117.5, 119.1                                     | -                                                                                                                                |
| 17       | 7.35                                                    | ddd, $J = 8.5, 7.2, 1.6$ Hz, 1H          | 135.7                                                       | $\text{H}^{16}, \text{H}^{18}$ ,                                     | 131.3, 148.0                                     | -                                                                                                                                |
| 18       | 6.70                                                    | ddd, $J = 8.2, 7.2, 1.1$ Hz, 1H          | 117.5                                                       | $\text{H}^{17}, \text{H}^{19}$                                       | 118.7, 119.1, 148.0                              | -                                                                                                                                |
| 19       | 7.58                                                    | dd, $J = 8.1, 1.6$ Hz, 1H                | 131.3                                                       | $\text{H}^{18}$                                                      | 135.7                                            | $\text{H}^5$ (very weak int.)                                                                                                    |
| 20       | 5.62                                                    | br. s, 2H                                | -                                                           | -                                                                    | -                                                | $\text{H}^5$                                                                                                                     |
| 21       | -                                                       | -                                        | 174.4                                                       | -                                                                    | -                                                | -                                                                                                                                |
| 22       | $\text{H}_a$ : 5.99                                     | br. s, 1H                                | -                                                           | -                                                                    | -                                                | $\text{H}^5$ (very weak int.)                                                                                                    |
|          | $\text{H}_b$ : 6.75                                     | br.s, 1H                                 |                                                             |                                                                      |                                                  | $\text{H}^5$ (very weak int.)                                                                                                    |

<sup>a</sup>Assignments are based on extensive 1D and 2D NMR analysis ( $^1\text{H}$ - $^1\text{H}$  COSY,  $^1\text{H}$ - $^{13}\text{C}$  HMQC,  $^1\text{H}$ - $^{13}\text{C}$  HMBC and  $^1\text{H}$ - $^1\text{H}$  NOESY); measured in MeCN- $d_3$ ; int. = interaction.

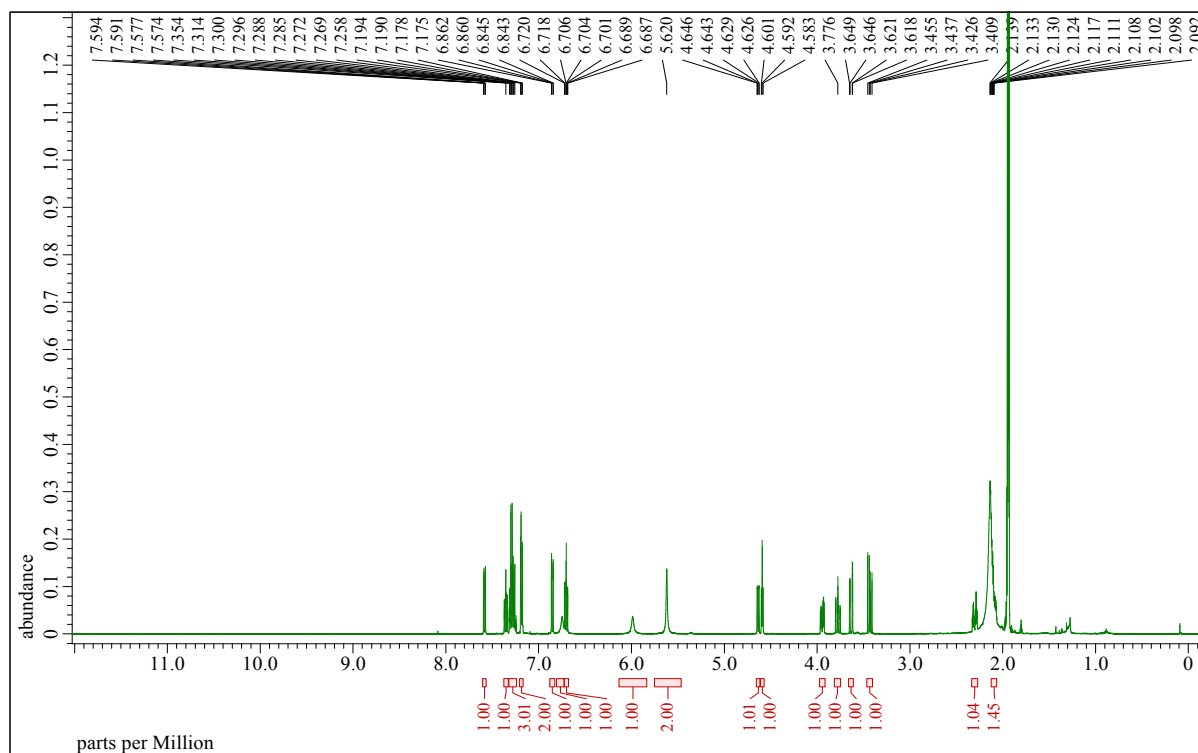

Figure S36.  $^1\text{H}$  NMR spectrum of  $7\text{b}^{2\text{S}}$  (500 MHz,  $\text{MeCN-}d_3$ )

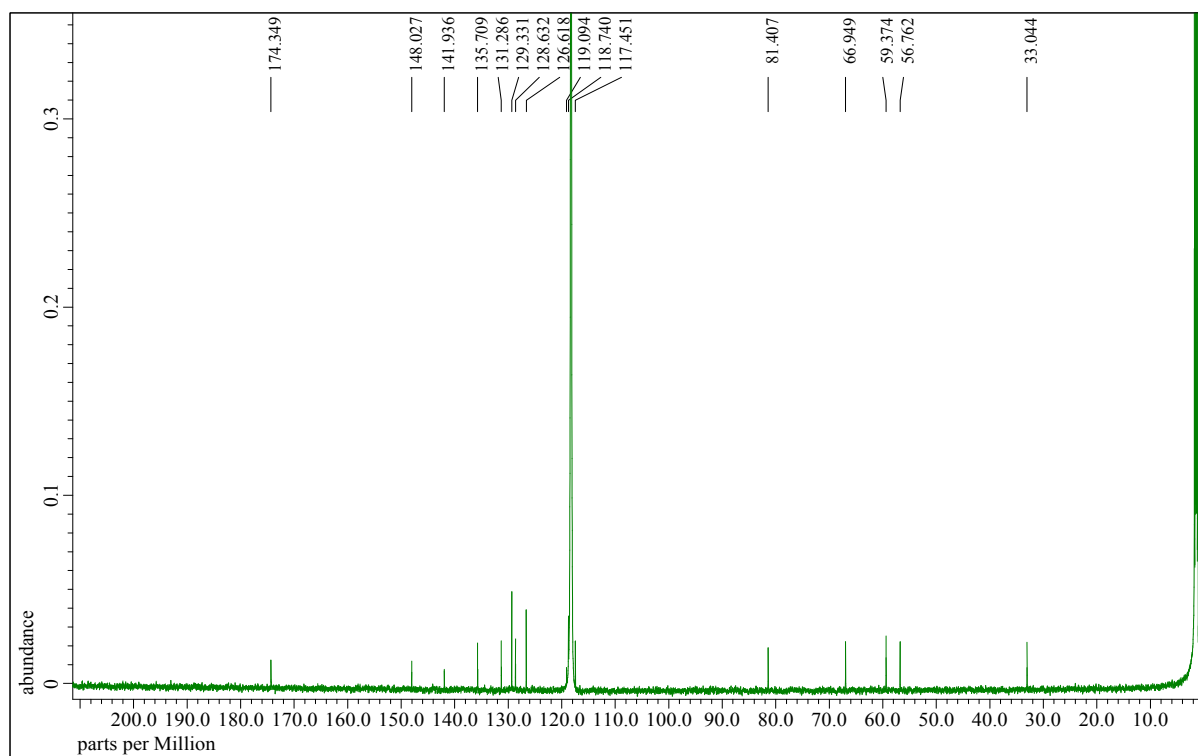

Figure S37.  $^{13}\text{C}\{^1\text{H}\}$  NMR spectrum of  $7\text{b}^{2\text{S}}$  (126 MHz,  $\text{MeCN-}d_3$ )

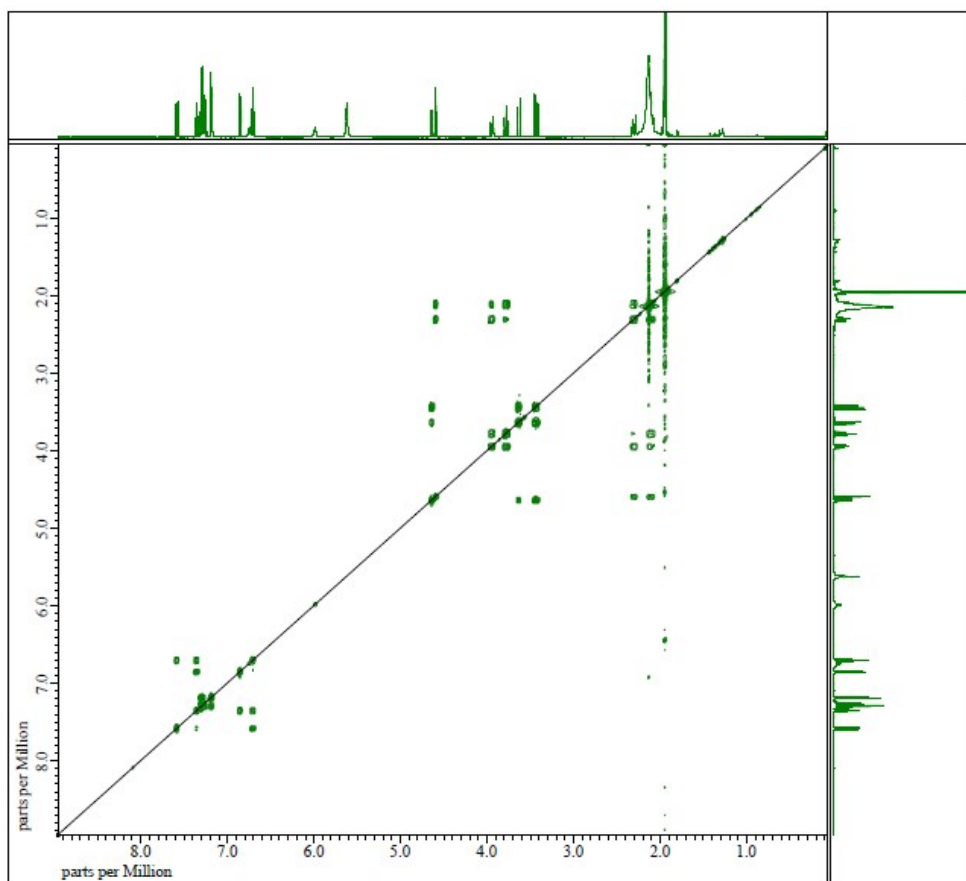

Figure S38.  $^1\text{H}$ - $^1\text{H}$  COSY NMR spectrum of **7b<sup>2S</sup>** (500 MHz, MeCN- $d_3$ )

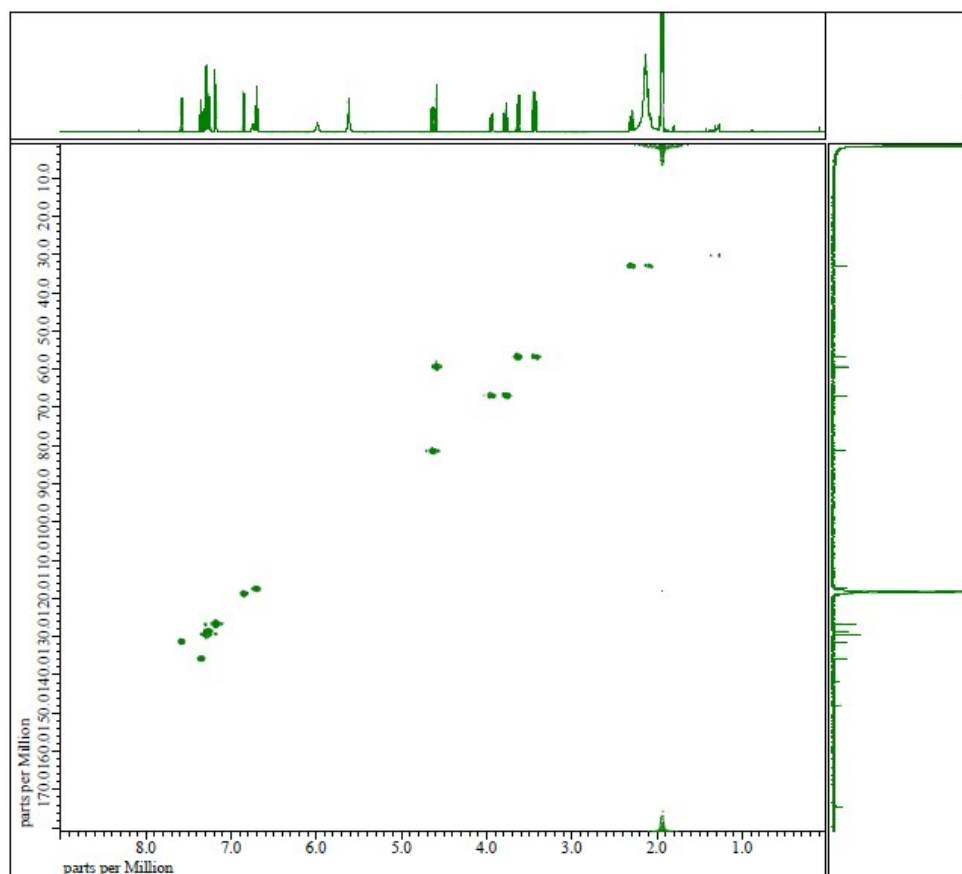

Figure S39.  $^1\text{H}$ - $^{13}\text{C}$  HMQC NMR spectrum of **7b<sup>2S</sup>** (MeCN- $d_3$ )

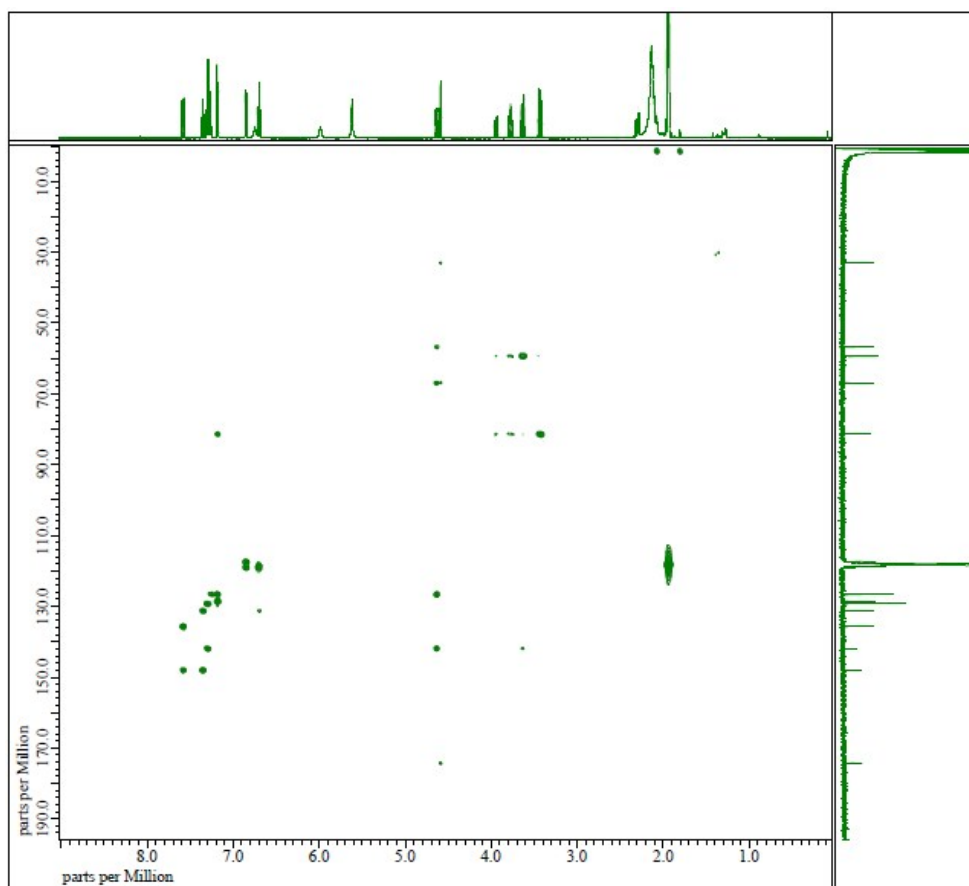

Figure S40.  $^1\text{H}$ - $^{13}\text{C}$  HMBC NMR spectrum of **7b<sup>2S</sup>** (MeCN- $d_3$ )

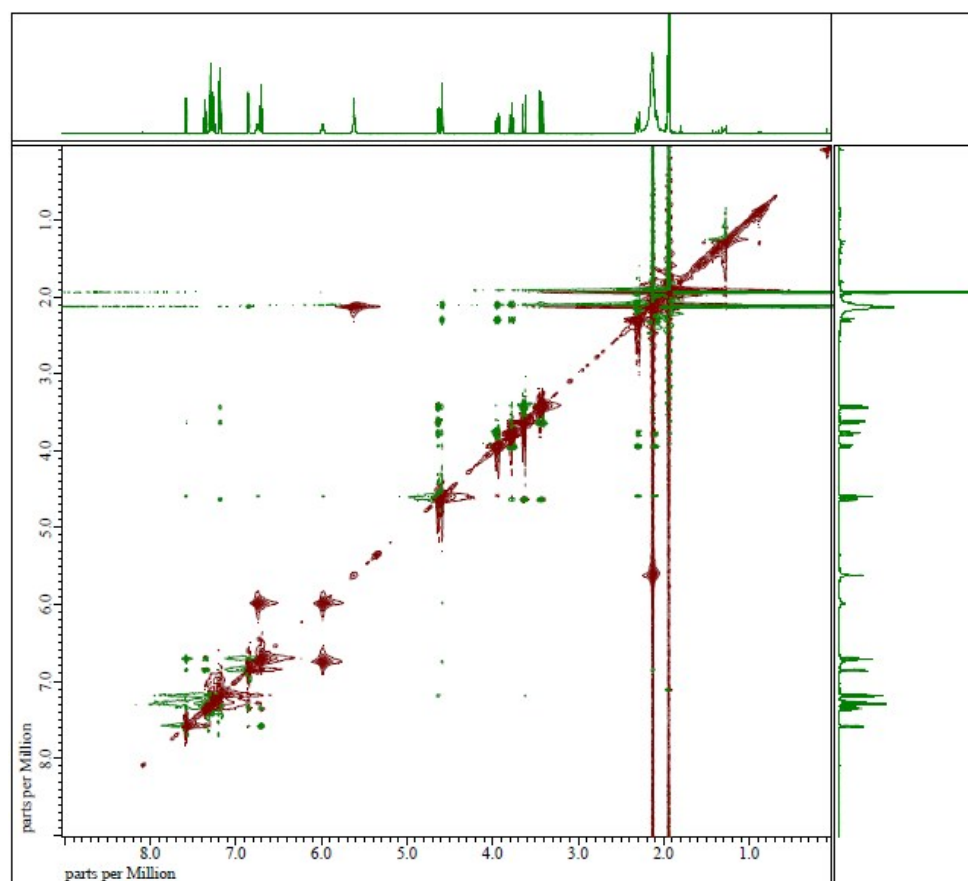

Figure S41.  $^1\text{H}$ - $^1\text{H}$  NOESY NMR spectrum of **7b<sup>2S</sup>** (MeCN- $d_3$ )



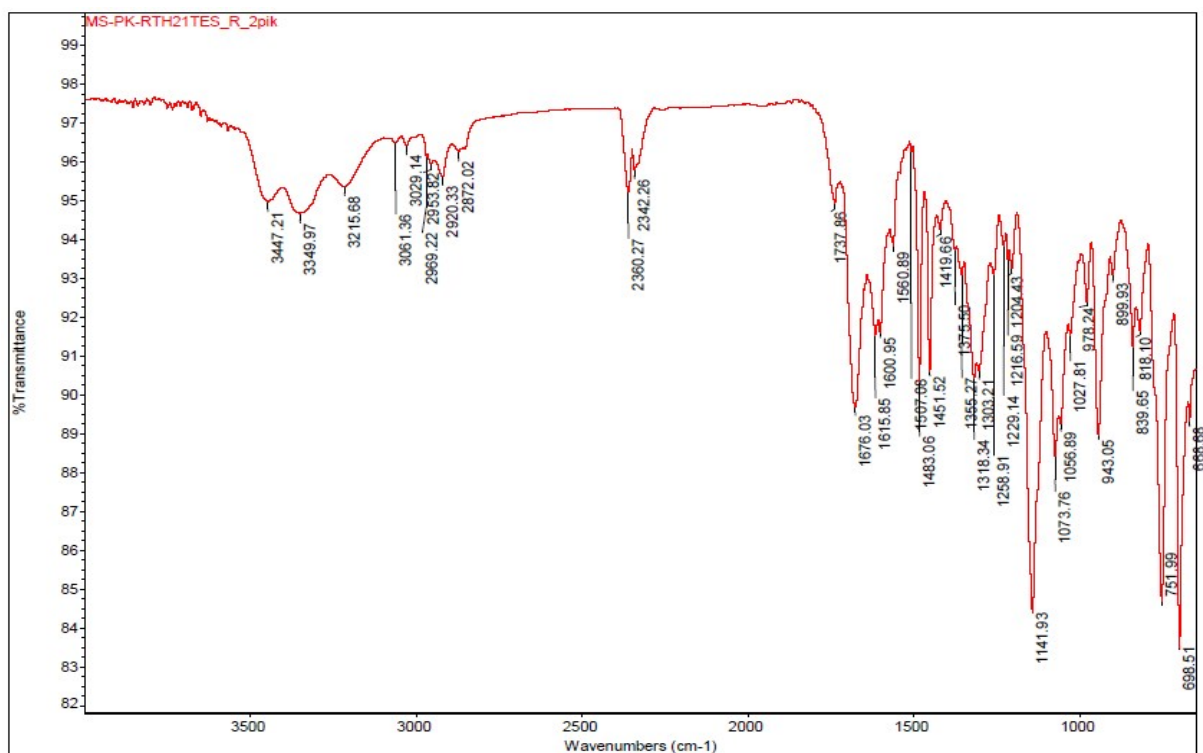

Figure S42. IR spectrum of **7b<sup>2S</sup>**

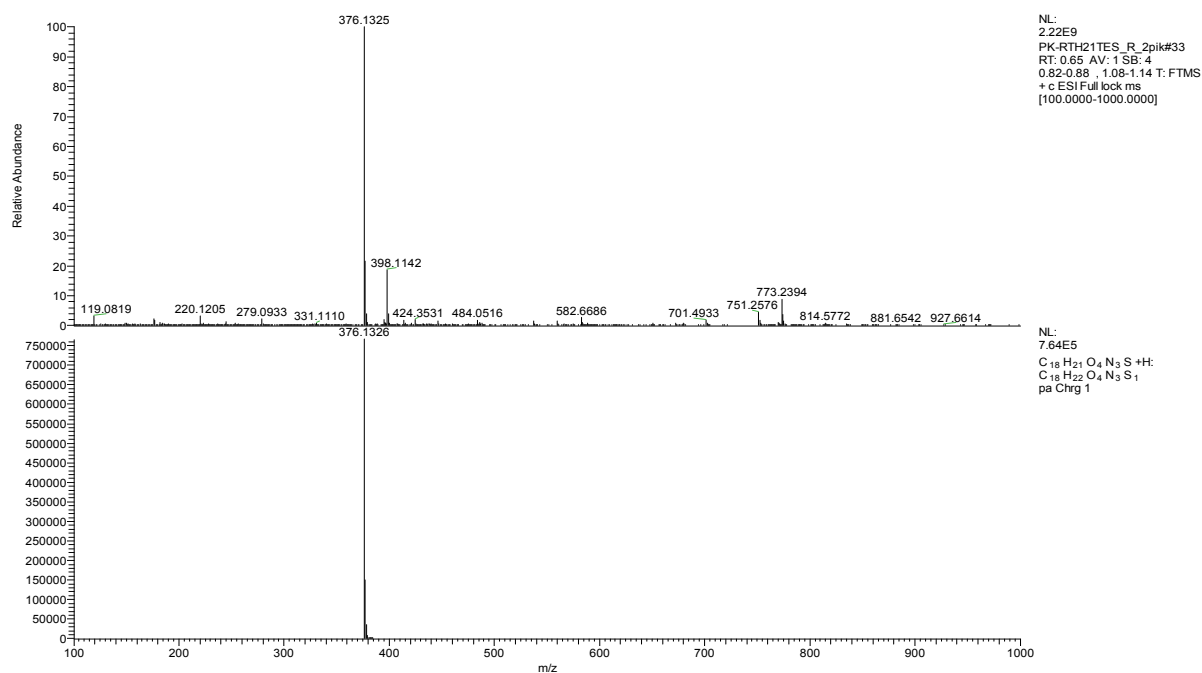

Figure S43. HRMS spectrum of **7b<sup>2S</sup>**

**(-)-(2R,5S)-4-((2-amino-4-methoxyphenyl)sulfonyl)-2-phenyl-1,4-oxazepane-5-carboxylic acid 7e**

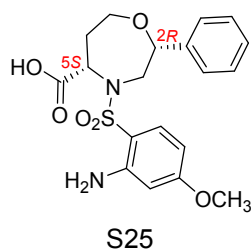

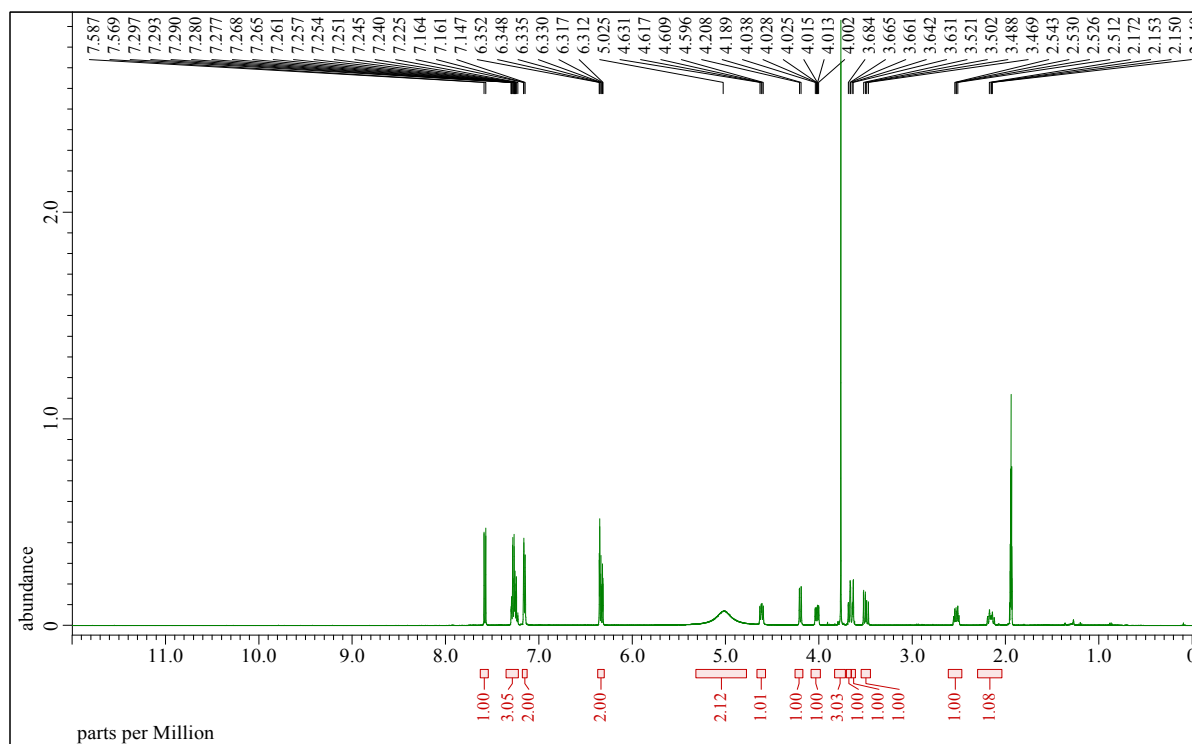

Figure S44.  $^1\text{H}$  NMR spectrum of **7e** (500 MHz,  $\text{MeCN-}d_3$ )

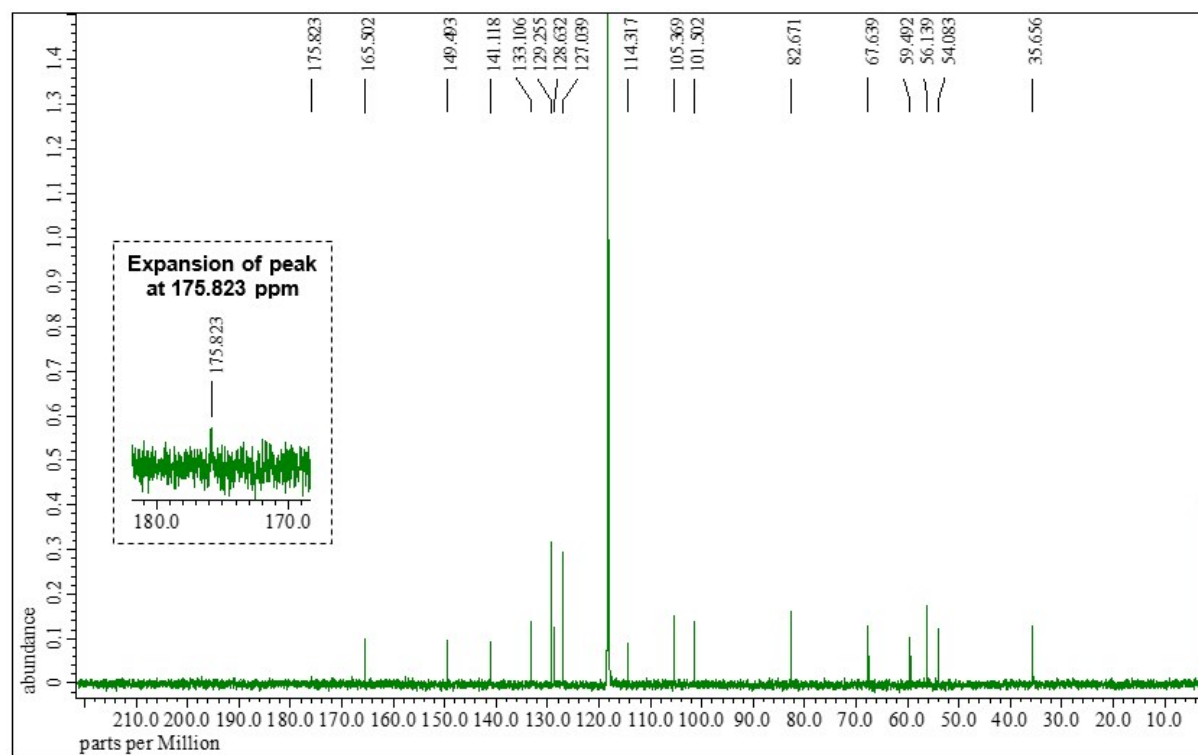

Figure S45.  $^{13}\text{C}\{^1\text{H}\}$  NMR spectrum of **7e** (126 MHz,  $\text{MeCN-}d_3$ )

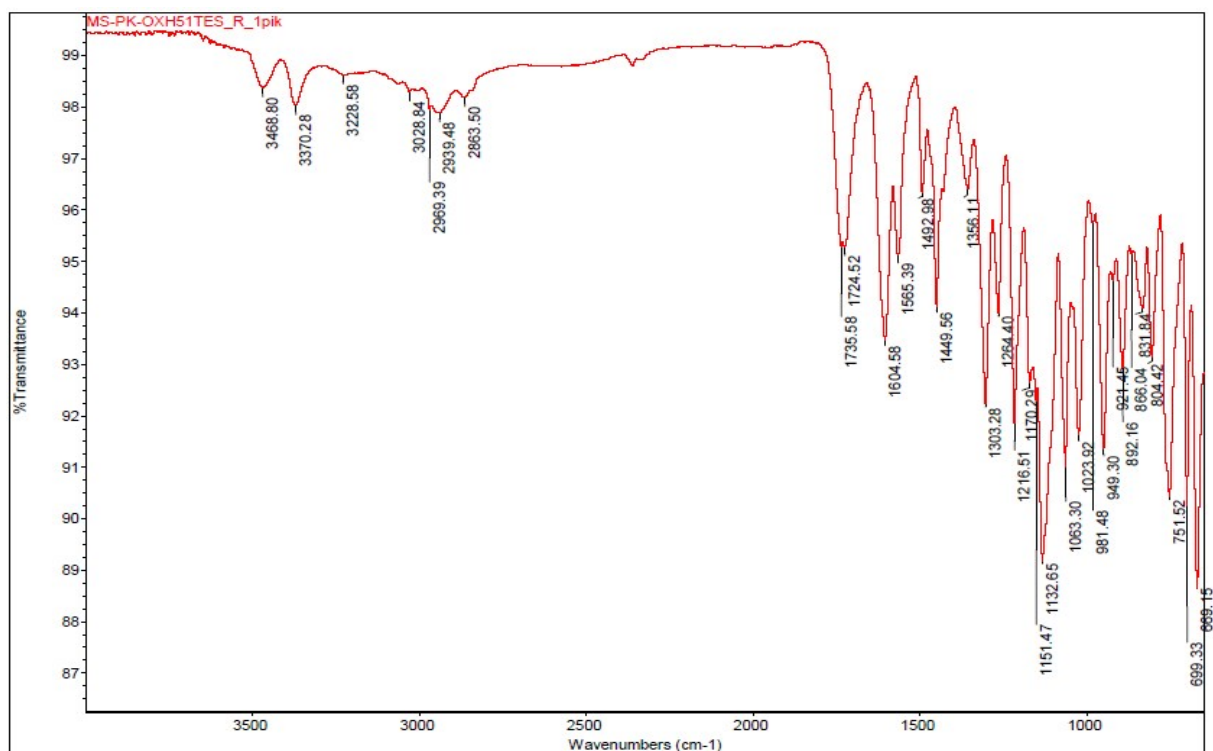

Figure S46. IR spectrum of 7e

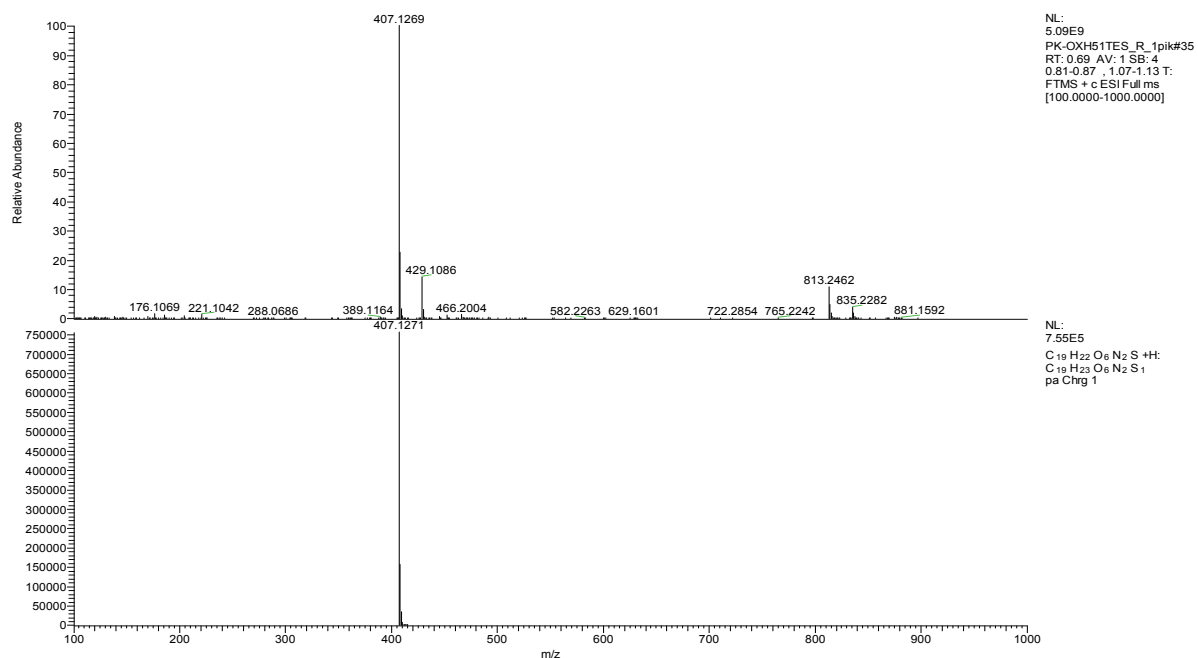

Figure S47. HRMS spectrum of 7e

(-)-(2*RS*,5*S*)-4-((2-amino-4-chlorophenyl)sulfonyl)-2-phenyl-1,4-oxazepane-5-carboxylic acid 7f<sup>2RS</sup>

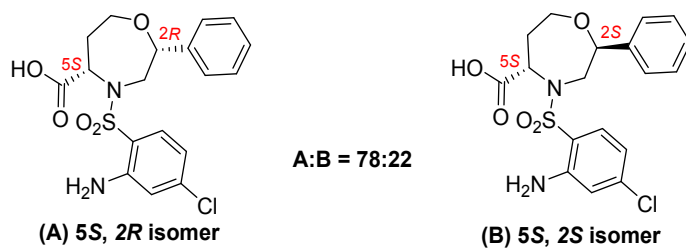

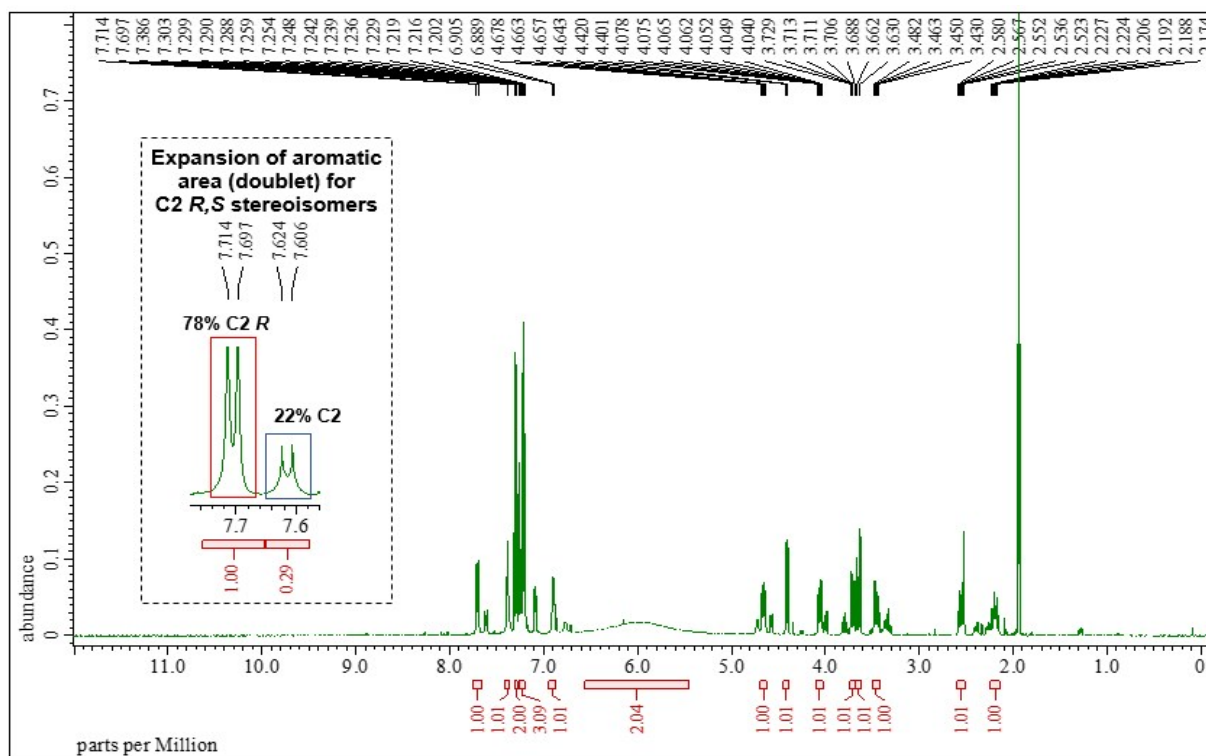

**Figure S48.**  $^1\text{H}$  NMR spectrum of  $7f^{2RS}$  (500 MHz,  $\text{MeCN-}d_3$ ). Note: Only the signals belonging to the major diastereomer were analyzed.

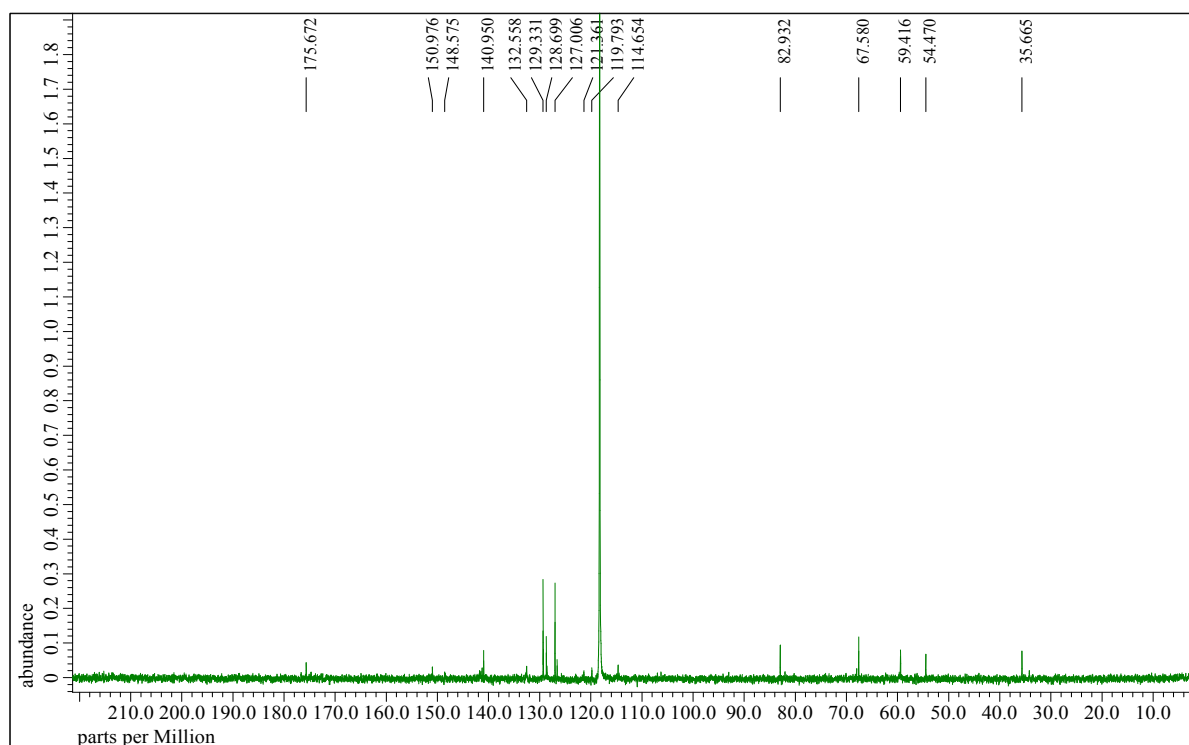

**Figure S49.**  $^{13}\text{C}\{^1\text{H}\}$  NMR spectrum of  $7f^{2RS}$  (126 MHz,  $\text{MeCN-}d_3$ ). Note: Only the signals belonging to the major diastereomer were analyzed.

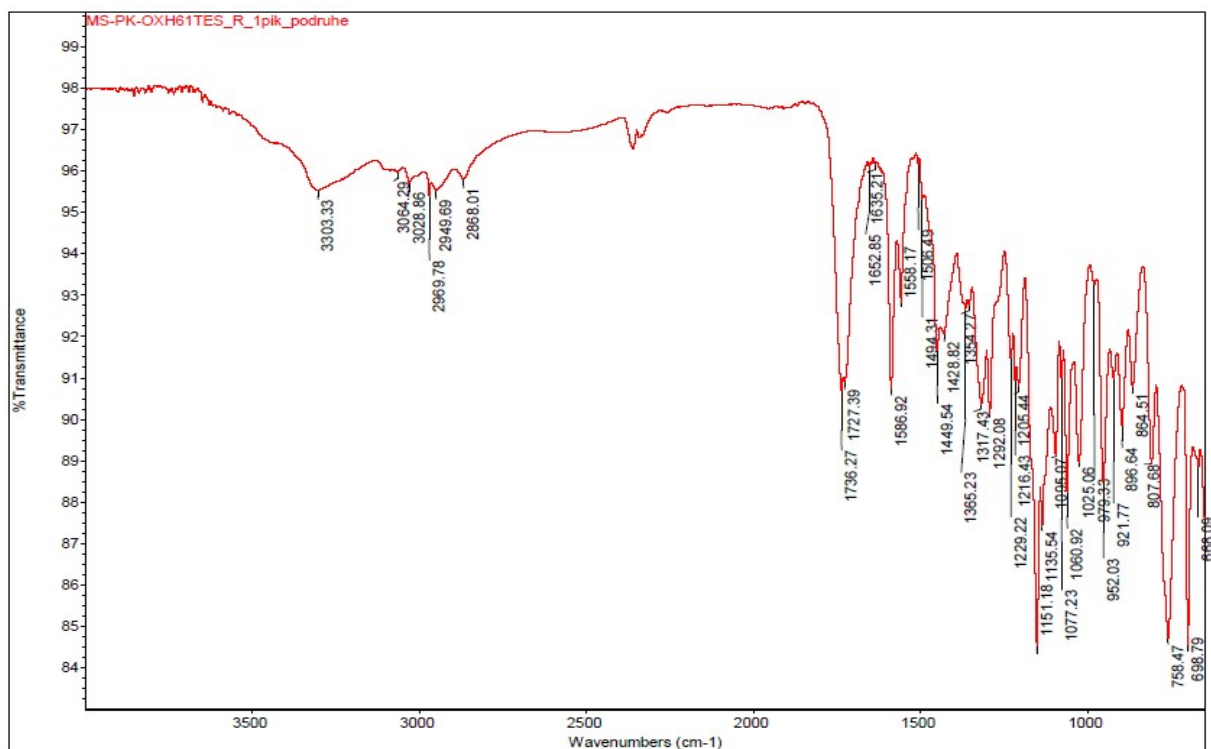

Figure S50. IR spectrum of **7f<sup>2RS</sup>**

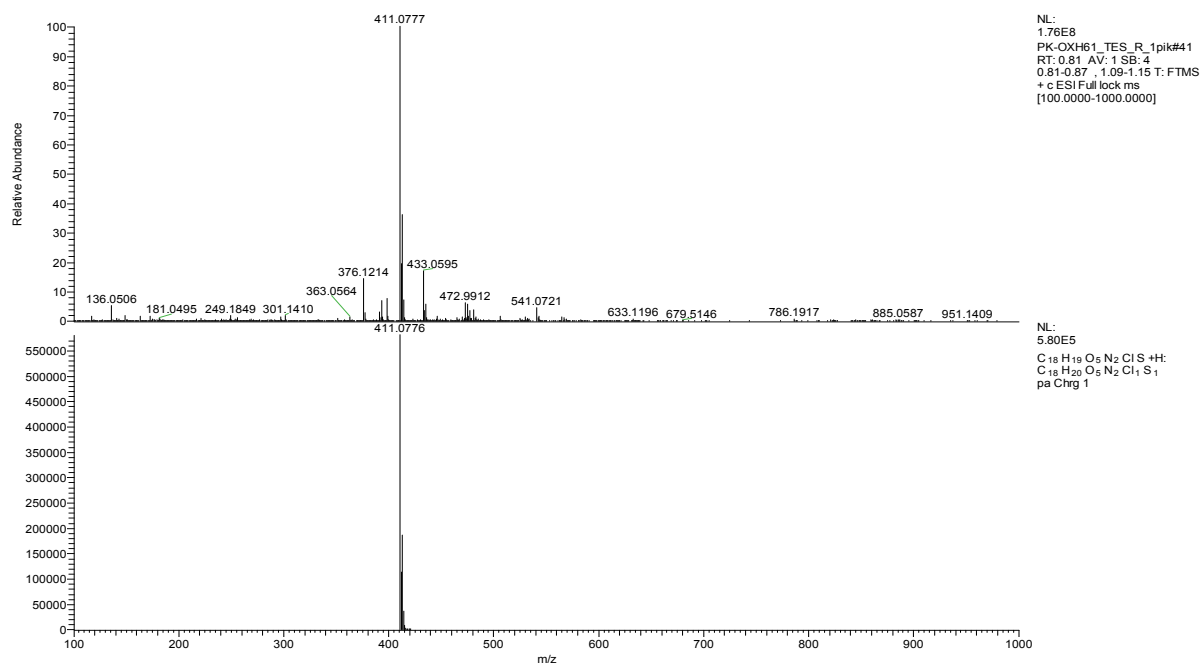

Figure S51. HRMS spectrum of **7f<sup>2RS</sup>**

**(-)-(2R,5S)-4-((2-aminophenyl)sulfonyl)-2-(2-fluorophenyl)-1,4-oxazepane-5-carboxylic acid 7i<sup>2R</sup>**

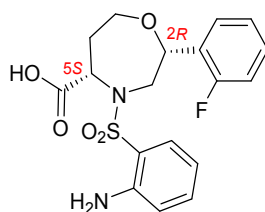

S29

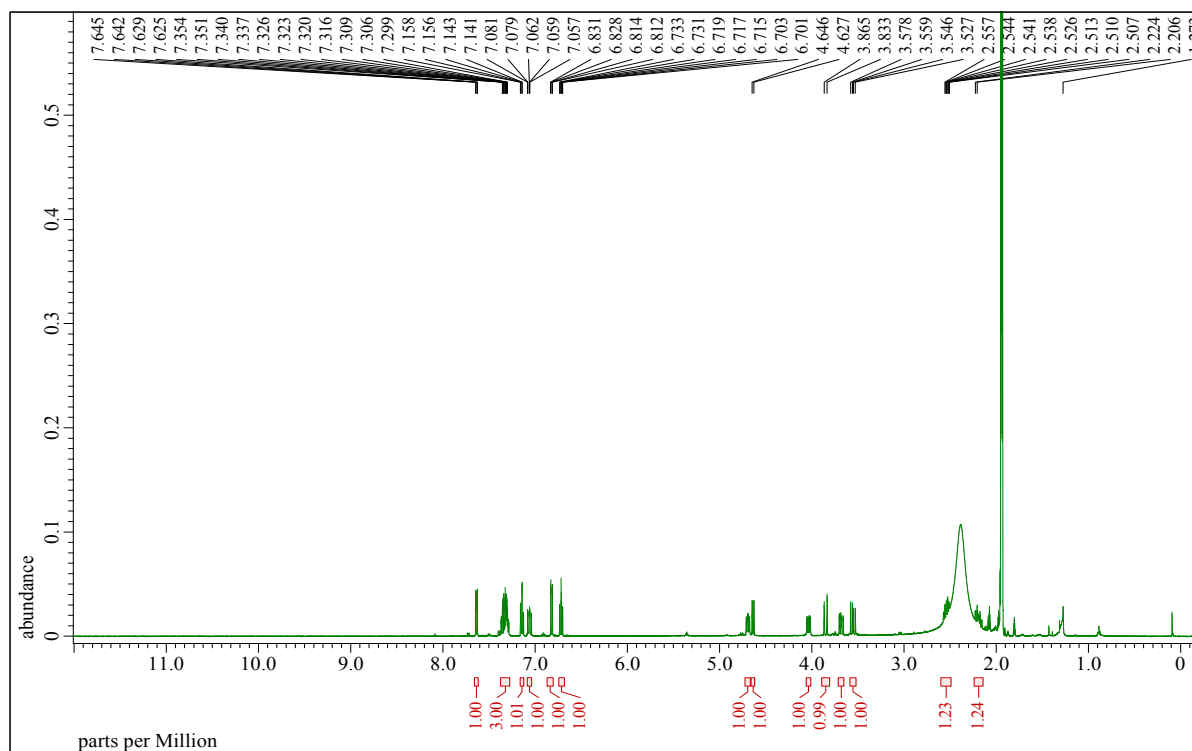

**Figure S52.**  $^1\text{H}$  NMR spectrum of  $7i^{2R}$  (500 MHz,  $\text{MeCN-}d_3$ )

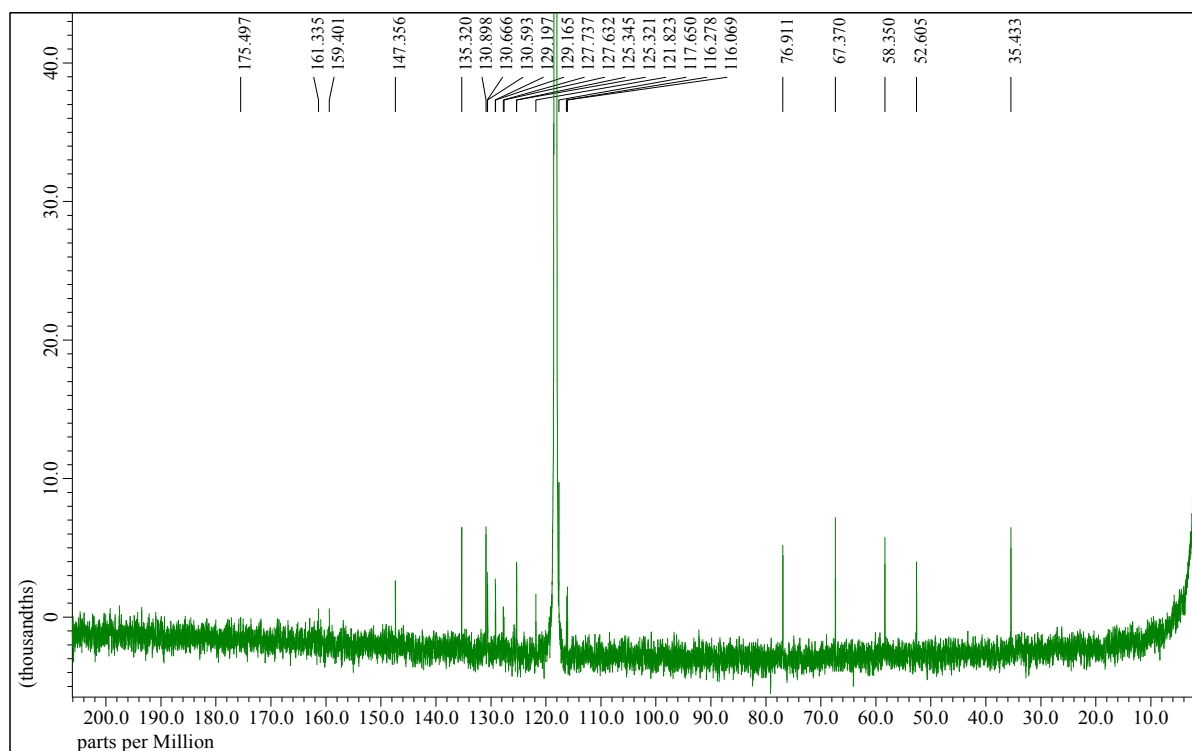

**Figure S53.**  $^{13}\text{C}\{^1\text{H}\}$  NMR spectrum of  $7i^{2R}$  (126 MHz,  $\text{MeCN-}d_3$ )

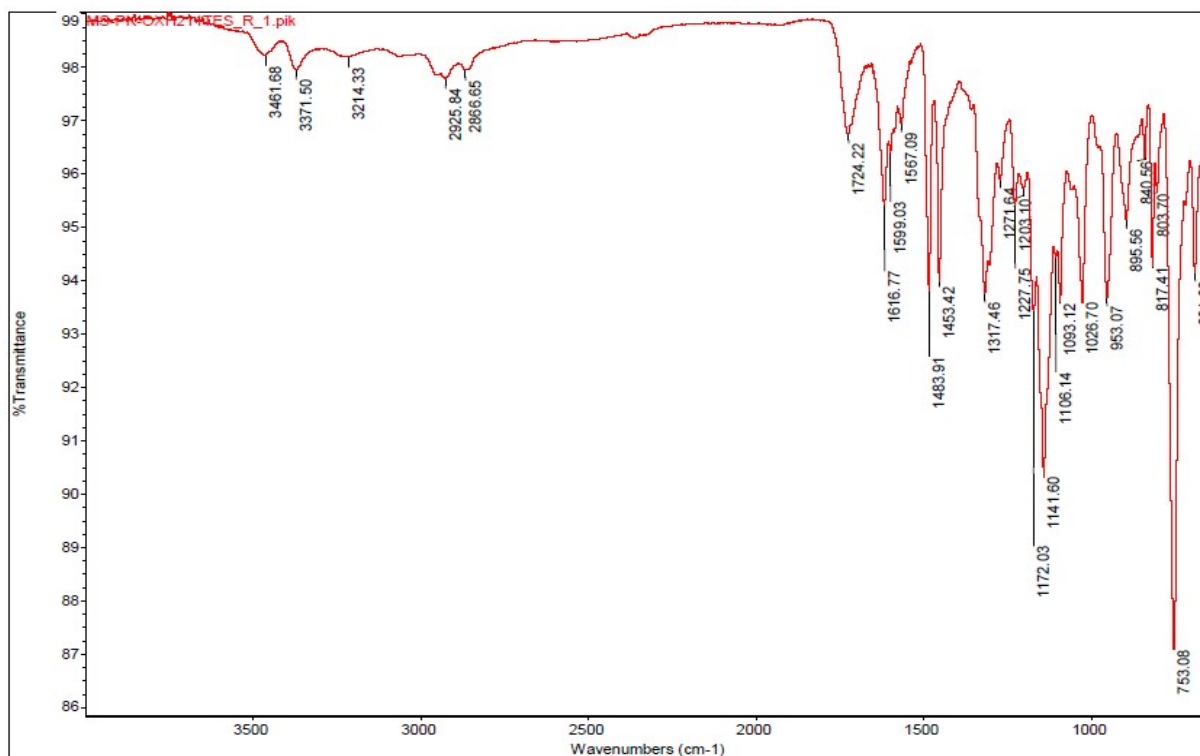

Figure S54. IR spectrum of **7i<sup>2R</sup>**

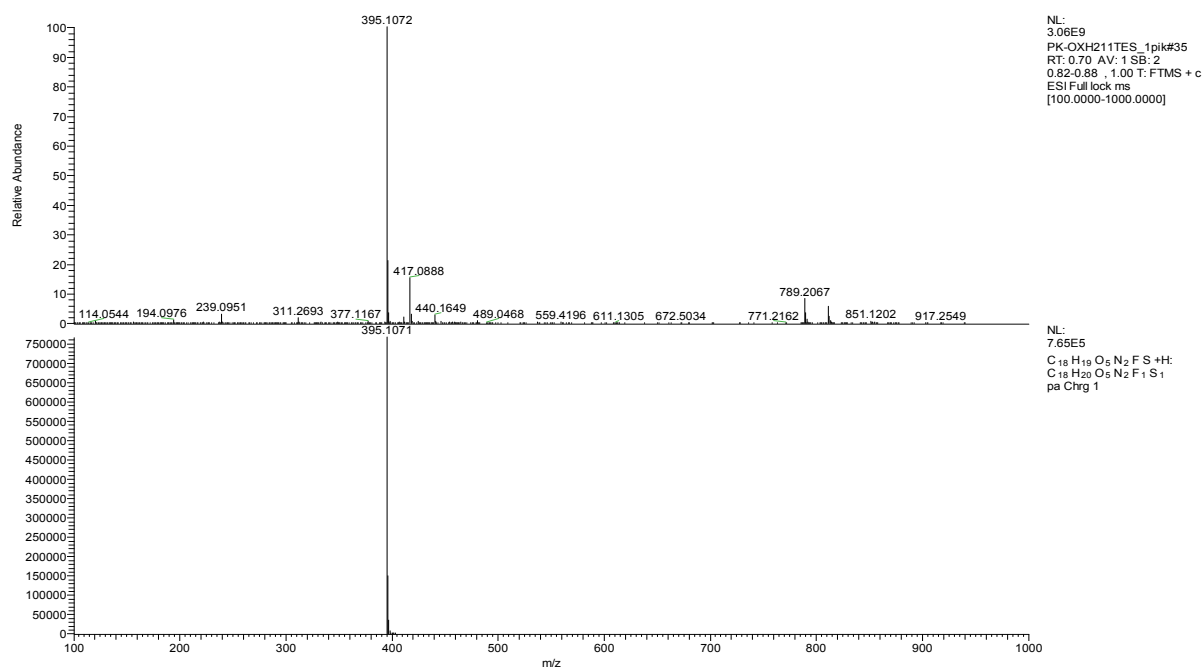

Figure S55. HRMS spectrum of **7i<sup>2R</sup>**

**(-)-(2*S*,5*S*)-4-((2-aminophenyl)sulfonyl)-2-(2-fluorophenyl)-1,4-oxazepane-5-carboxylic acid 7i<sup>2S</sup>**

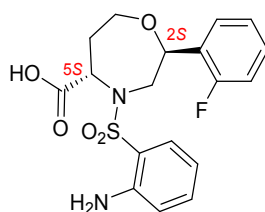

S31

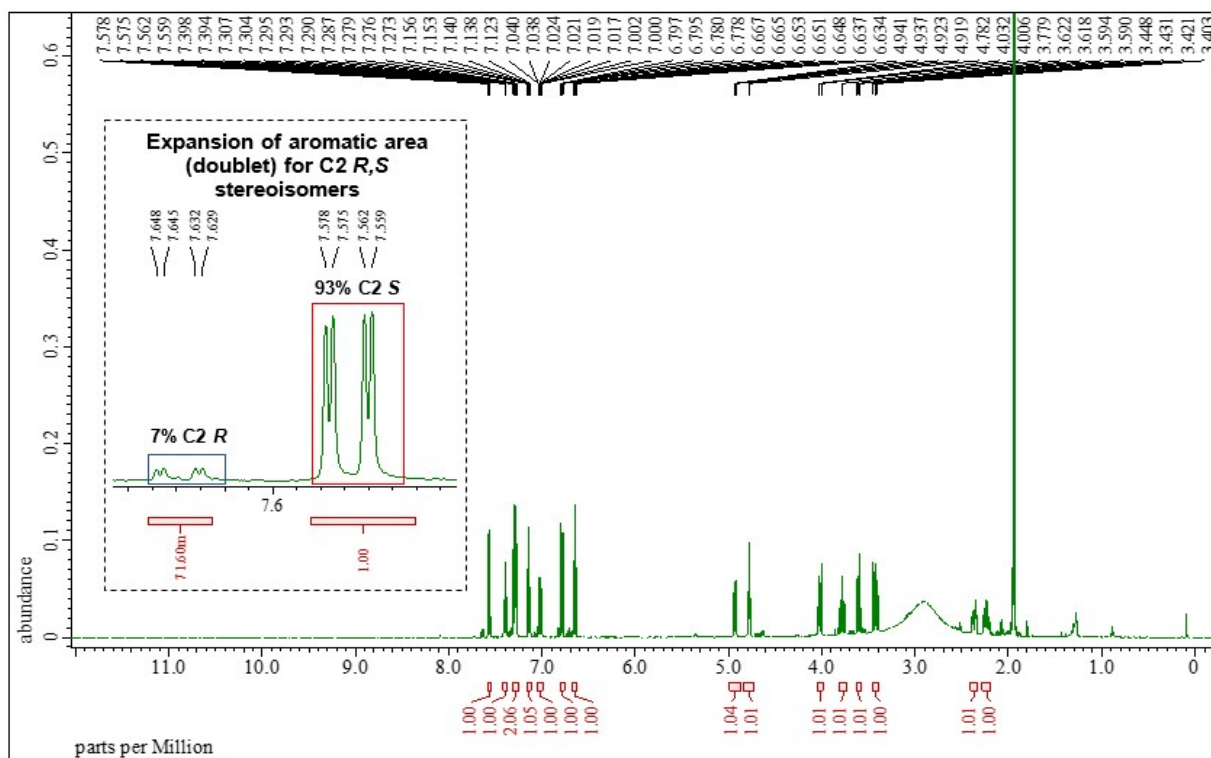

**Figure S56.**  $^1\text{H}$  NMR spectrum of  $7i^{2S}$  (500 MHz,  $\text{MeCN-}d_3$ ). Note: Only the signals belonging to the major diastereomer were analyzed.

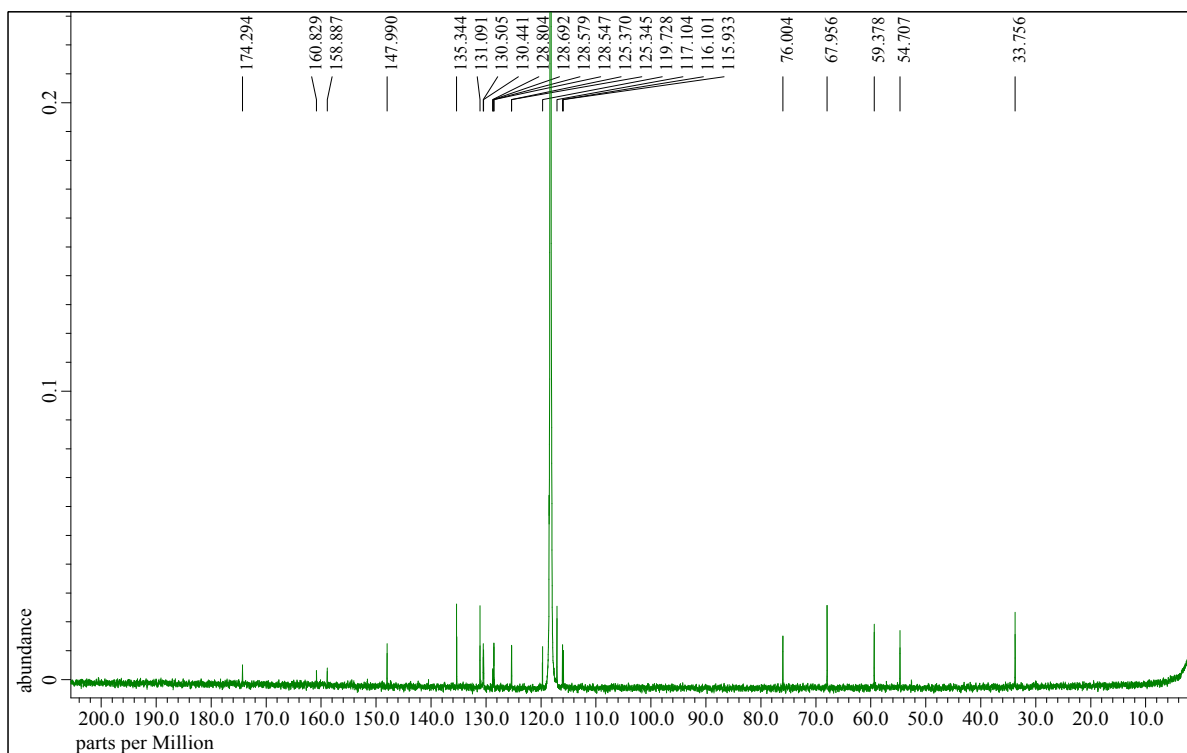

**Figure S57.**  $^{13}\text{C}\{^1\text{H}\}$  NMR spectrum of  $7i^{2S}$  (126 MHz,  $\text{MeCN-}d_3$ ). Note: Only the signals belonging to the major diastereomer were analyzed.



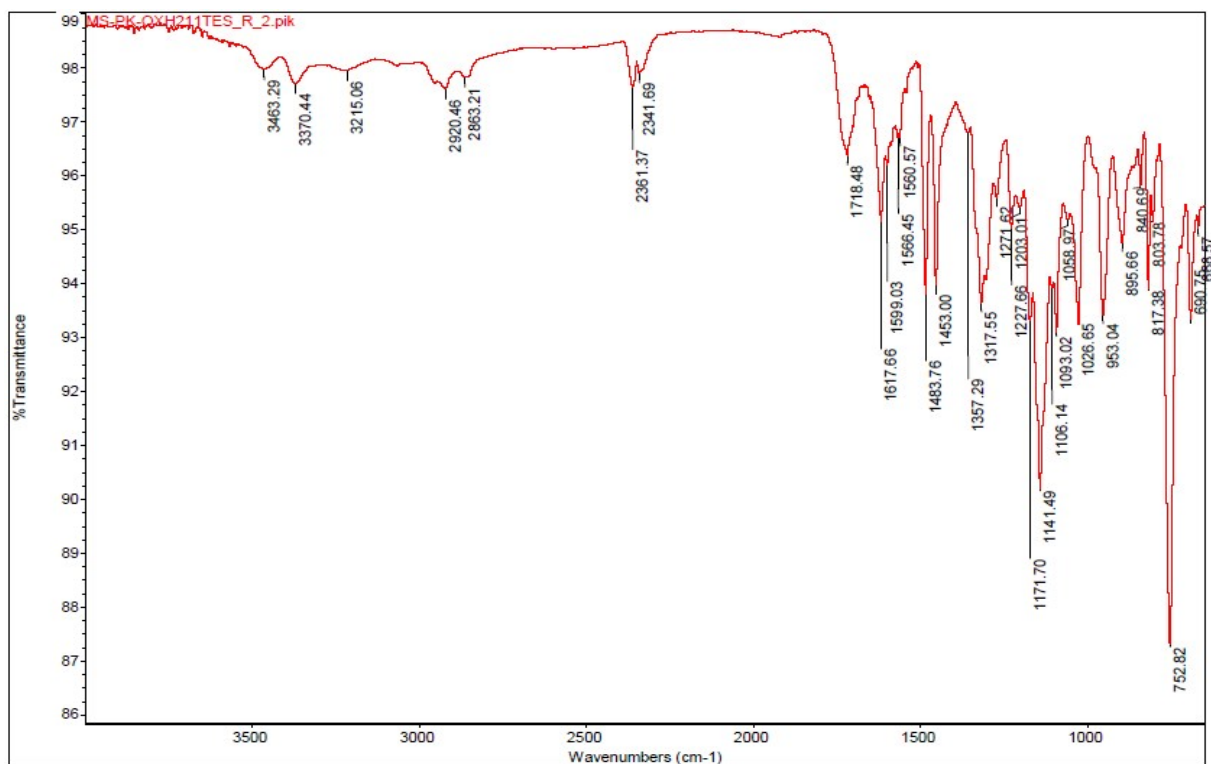

Figure S58. IR spectrum of 7i2S

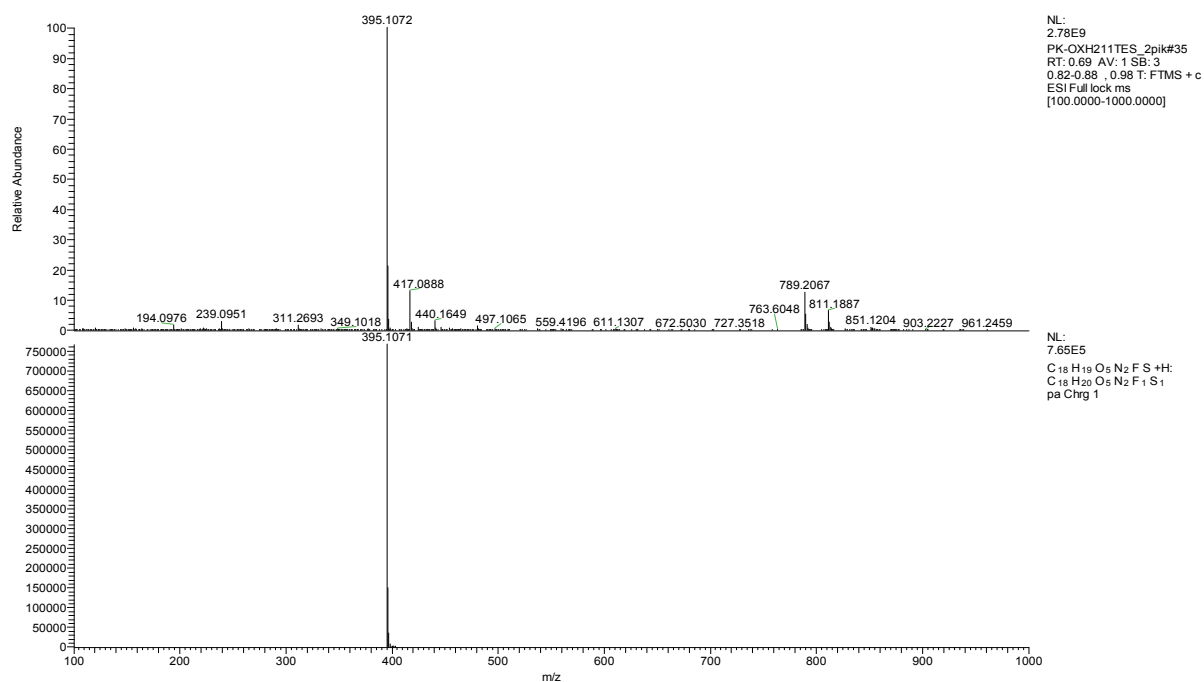

Figure S59. HRMS spectrum of 7i2S

(-)-(2*R*,5*S*)-4-((2-aminophenyl)sulfonyl)-2-(3-fluorophenyl)-1,4-oxazepane-5-carboxylic acid 7k

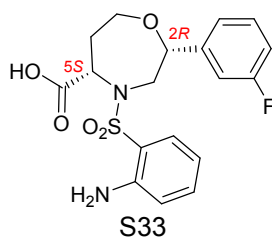

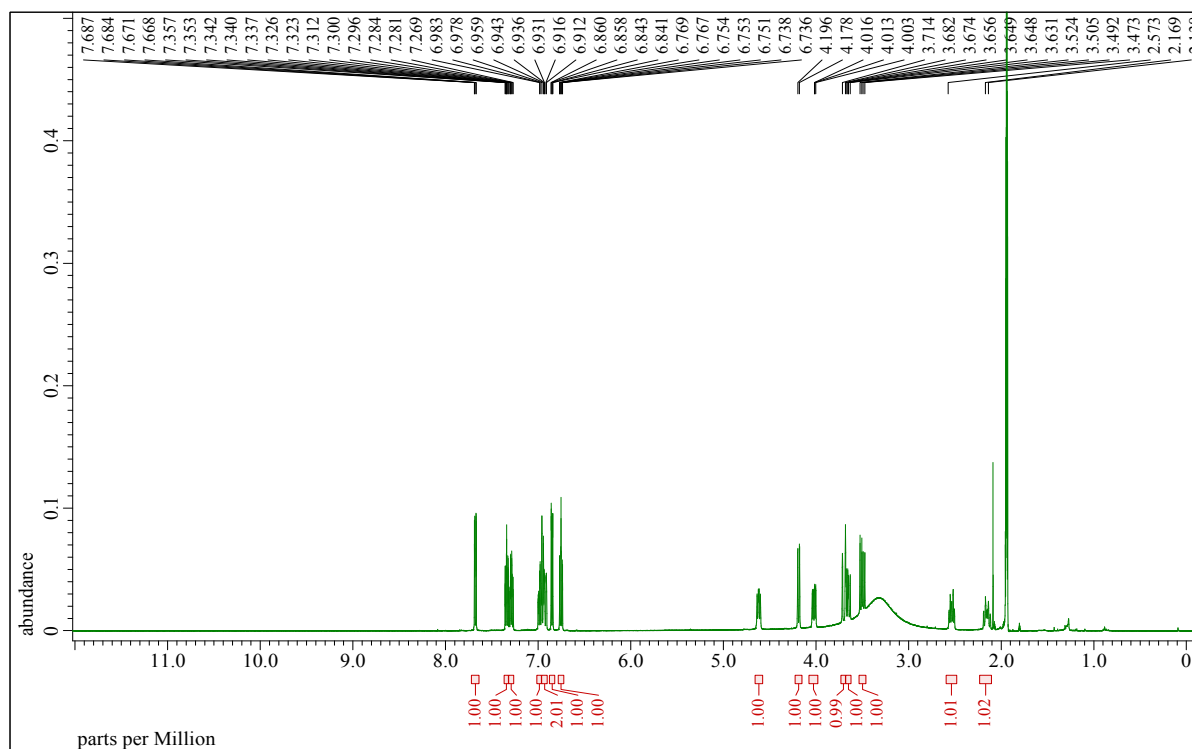

**Figure S60.**  $^1\text{H}$  NMR spectrum of **7k** (500 MHz,  $\text{MeCN-}d_3$ )

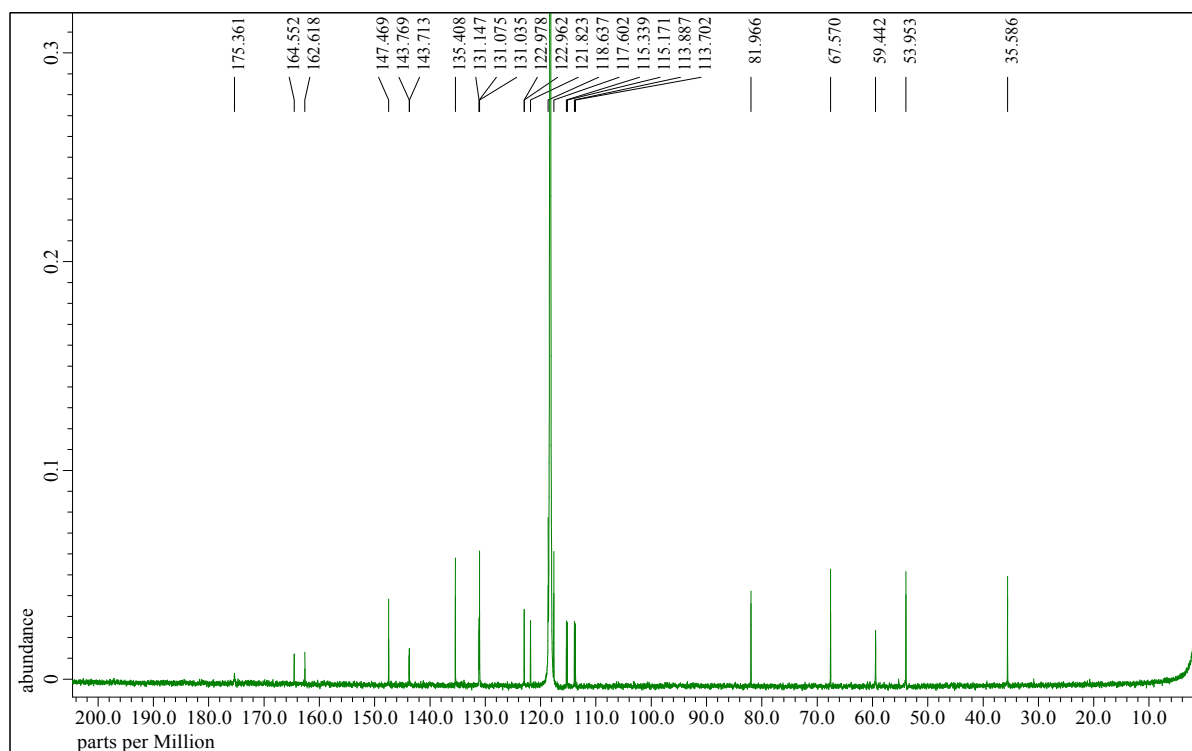

**Figure S61.**  $^{13}\text{C}\{^1\text{H}\}$  NMR spectrum of **7k** (126 MHz,  $\text{MeCN-}d_3$ )

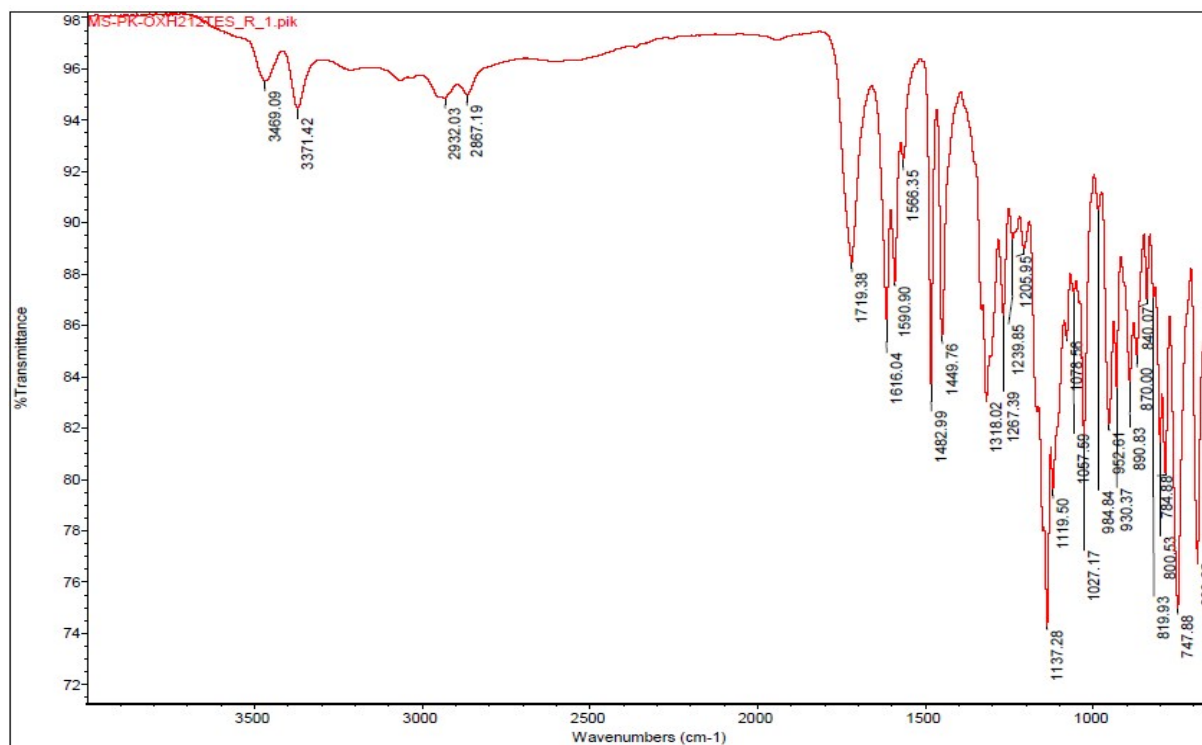

Figure S62. IR spectrum of 7k

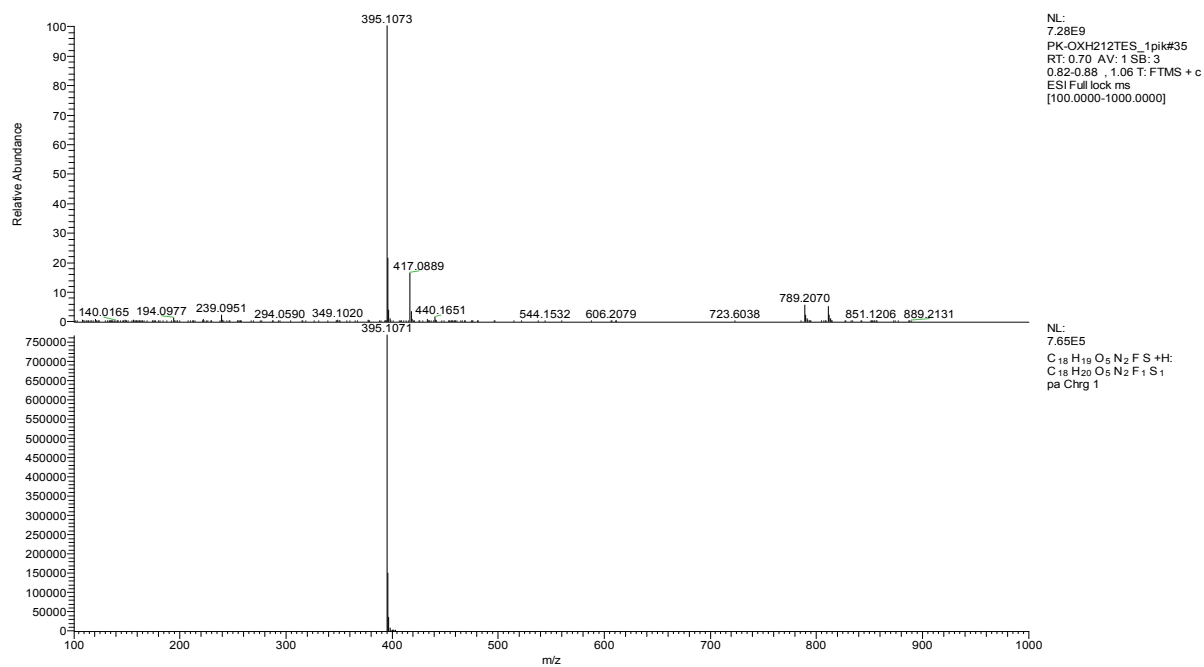

Figure S63. HRMS spectrum of 7k

**(+)-(2*R*,5*S*)-4-((2-aminophenyl)sulfonyl)-2-(*p*-tolyl)-1,4-oxazepane-5-carboxylic acid 7m**

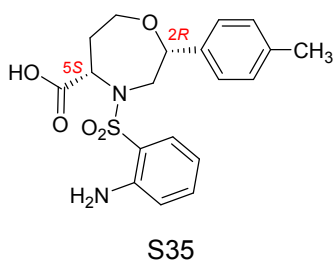

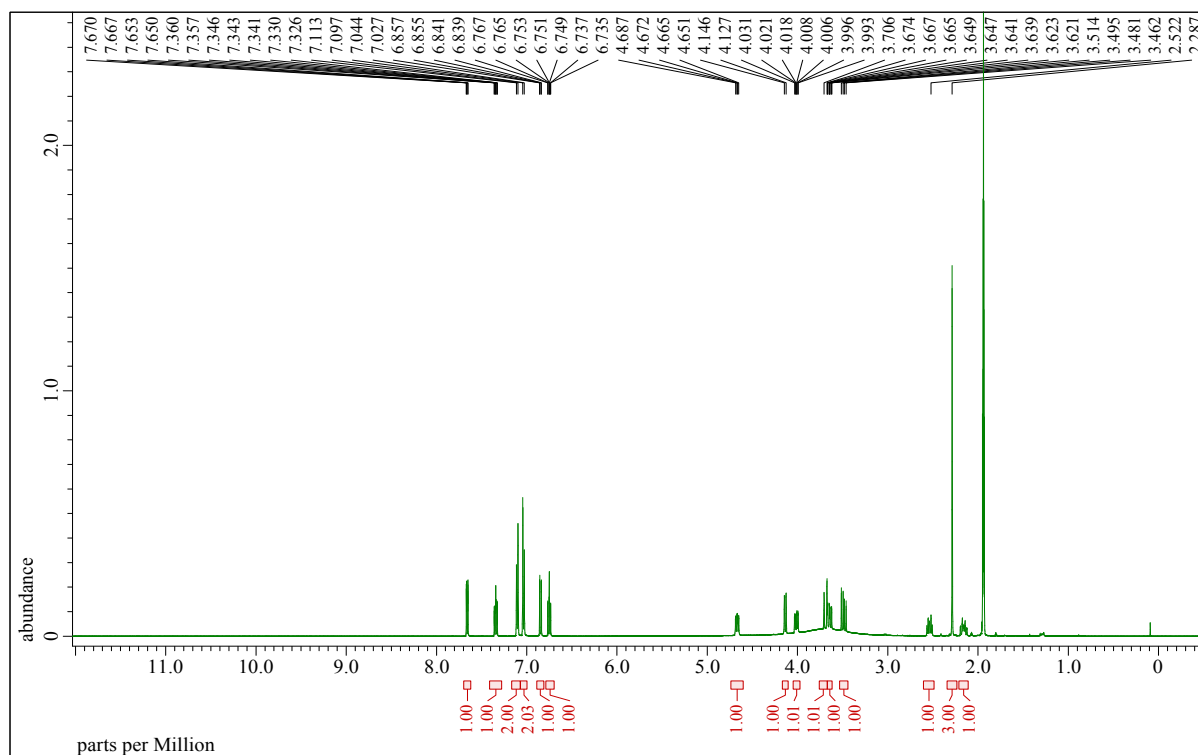

Figure S64.  $^1\text{H}$  NMR spectrum of **7m** (500 MHz,  $\text{MeCN-d}_3$ )

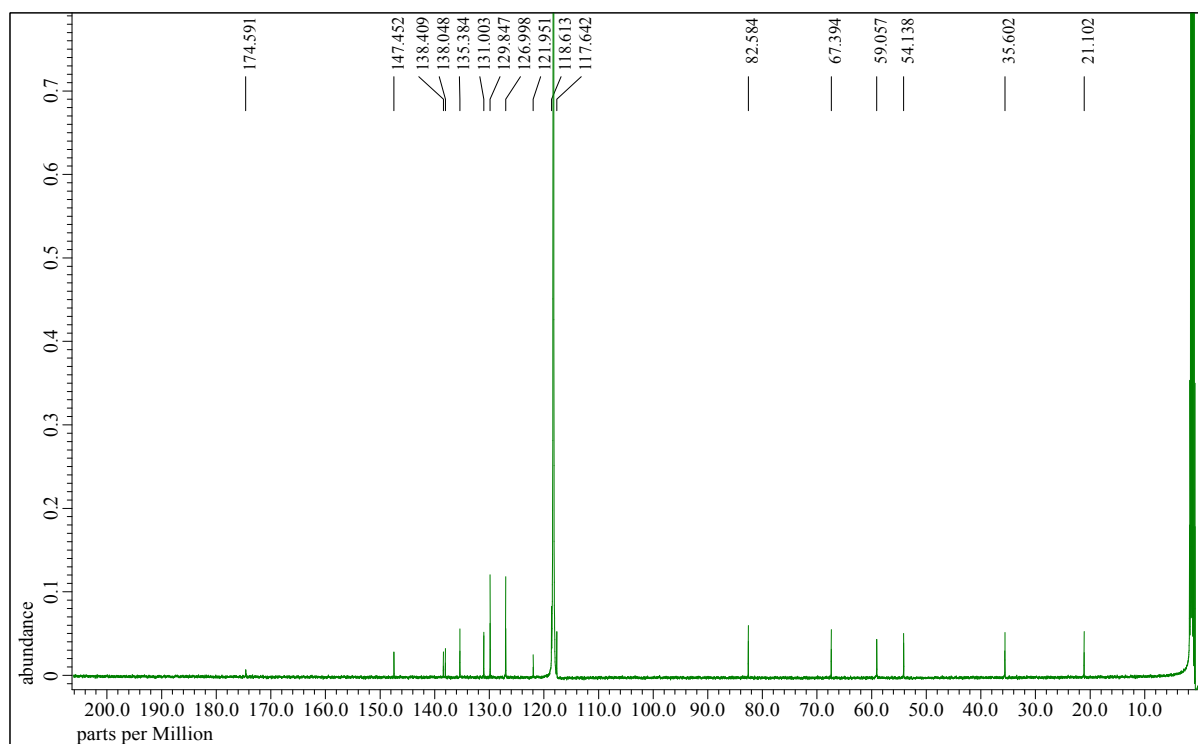

Figure S65.  $^{13}\text{C}\{^1\text{H}\}$  NMR spectrum of **7m** (126 MHz,  $\text{MeCN-d}_3$ )

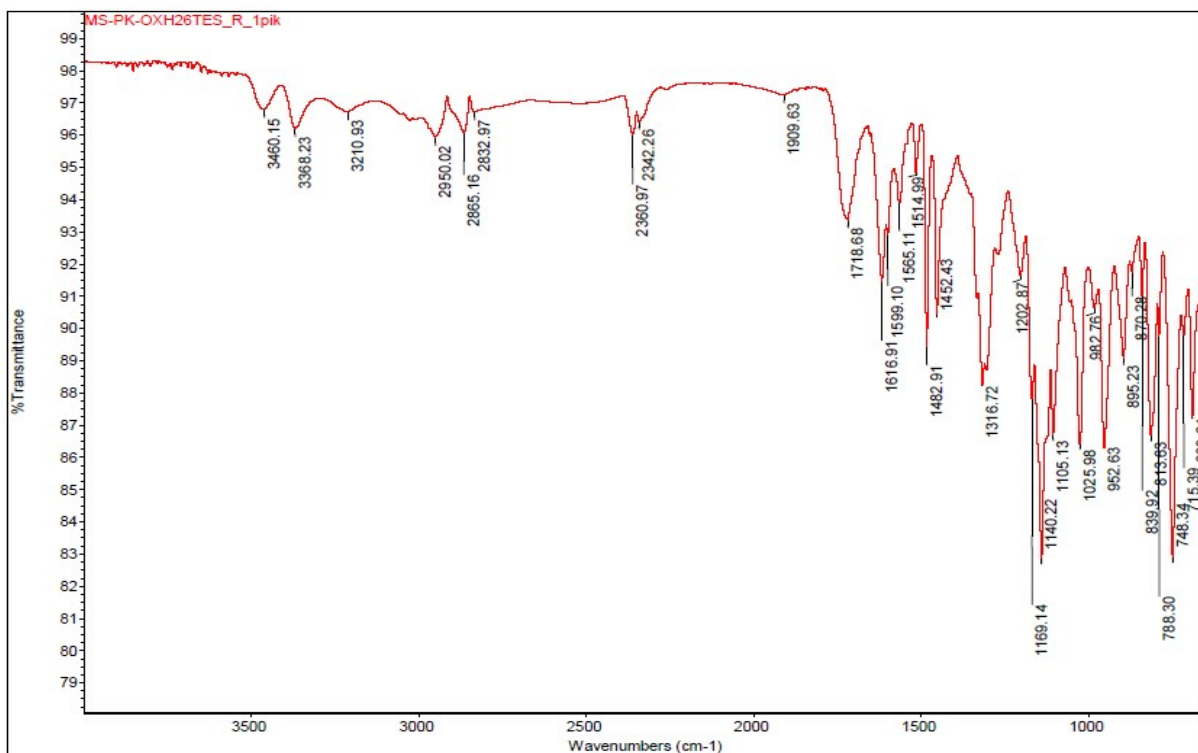

Figure S66. IR spectrum of 7m

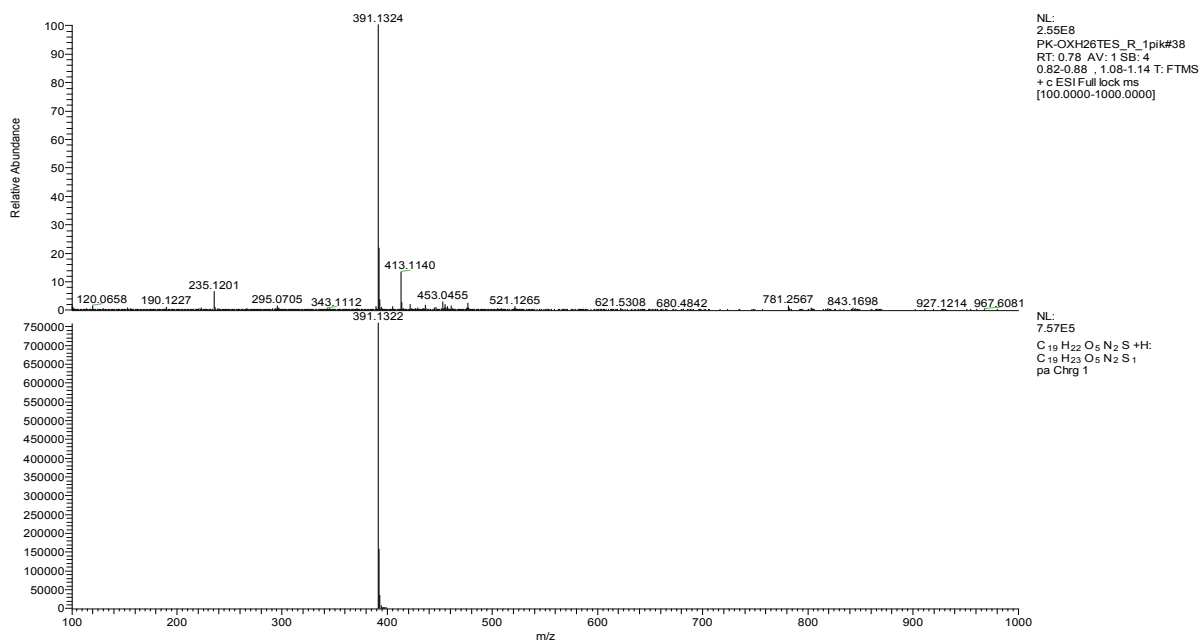

Figure S67. HRMS spectrum of 7m

**(+)-(2*R*,5*S*)-4-((2-aminophenyl)sulfonyl)-2-(4-fluorophenyl)-1,4-oxazepane-5-carboxylic acid 7o**

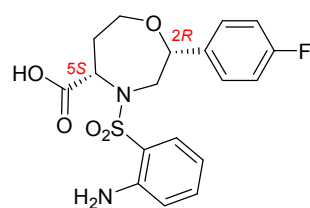

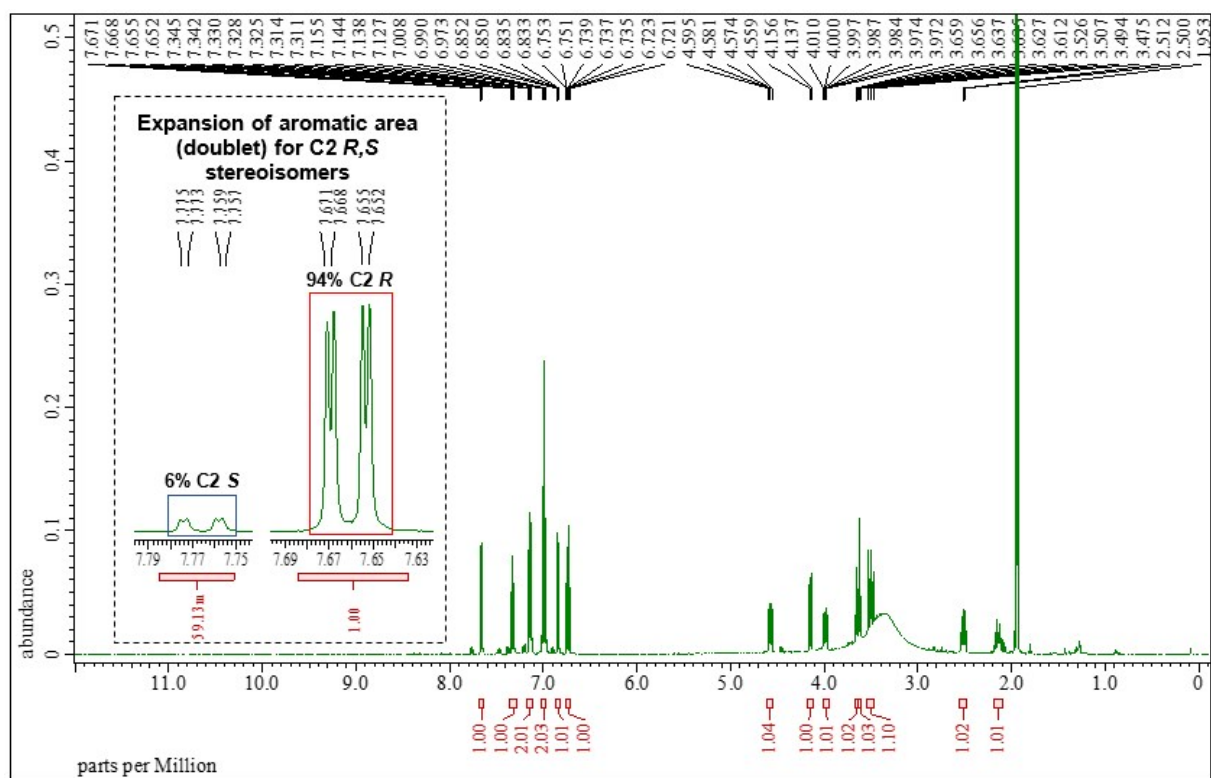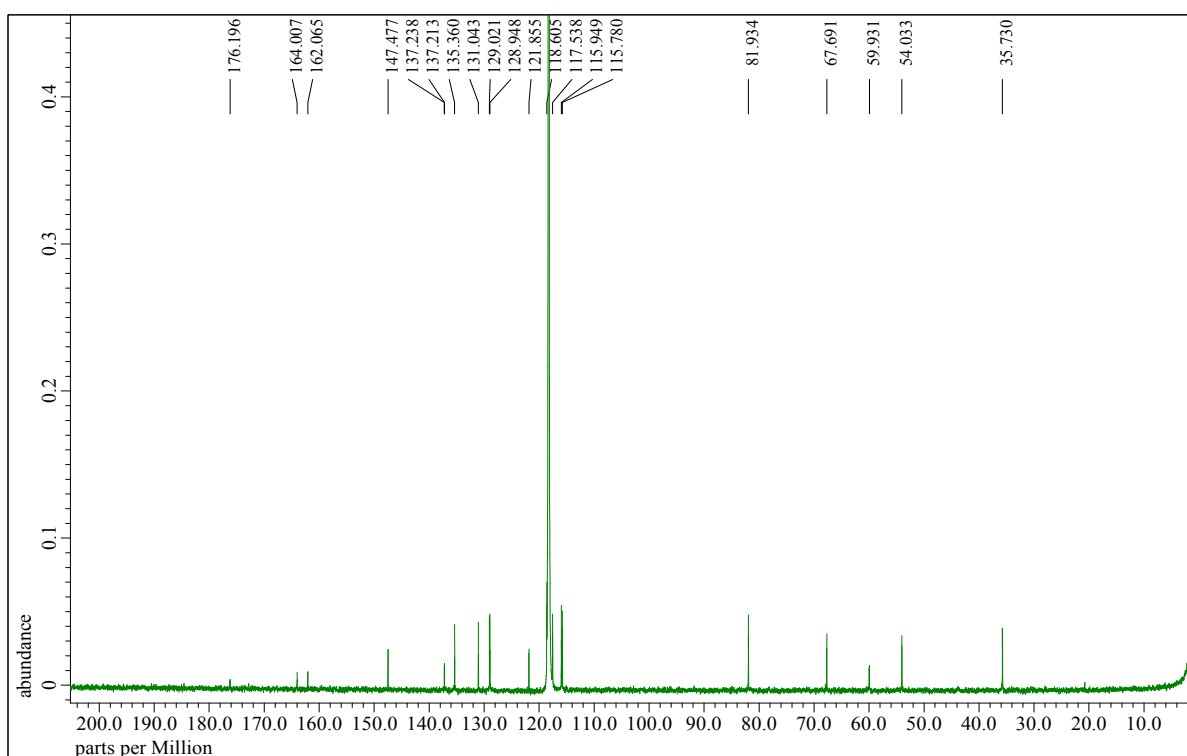

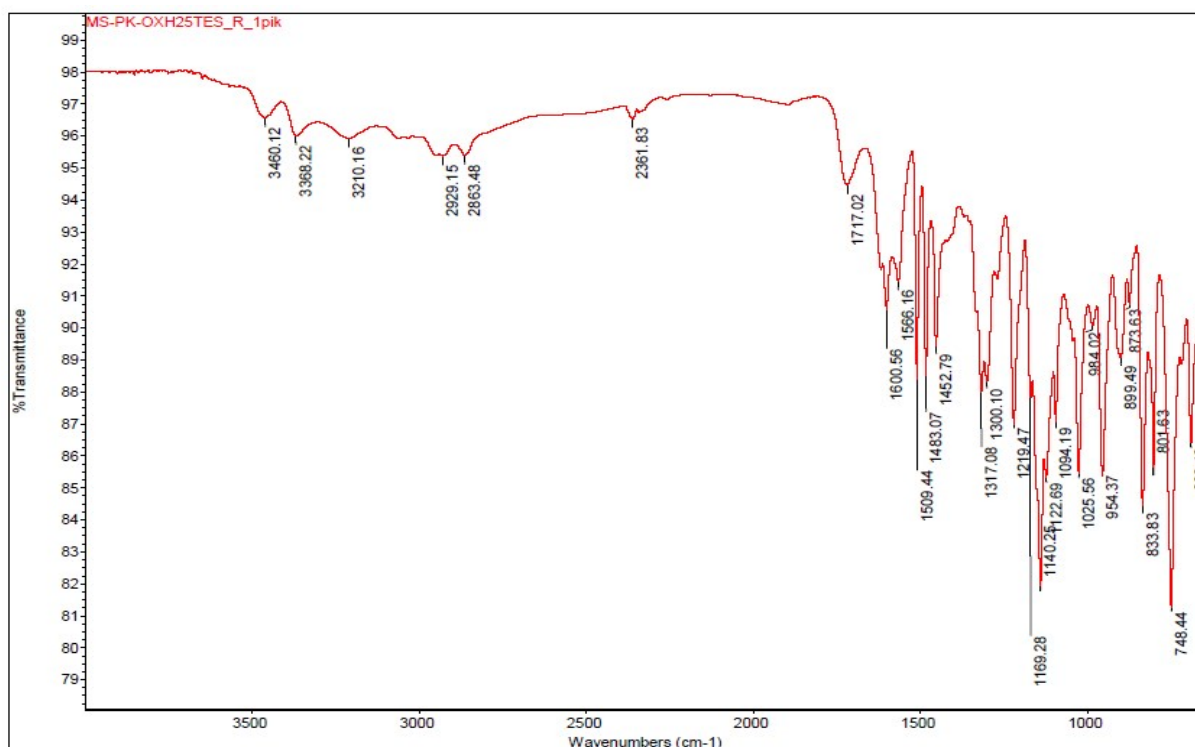

Figure S70. IR spectrum of **7o**

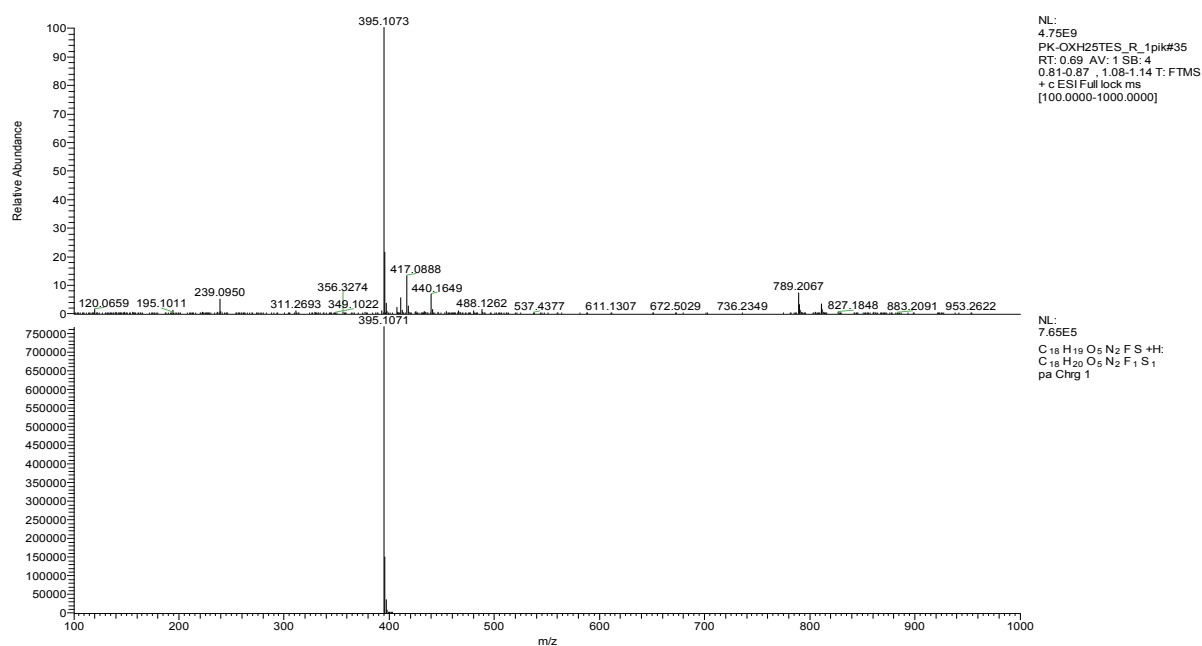

Figure S71. HRMS spectrum of **7o**

(-)-(2*R*,5*S*)-4-((2-aminophenyl)sulfonyl)-2-(4-(trifluoromethyl)phenyl)-1,4-oxazepane-5-carboxylic acid **7q**

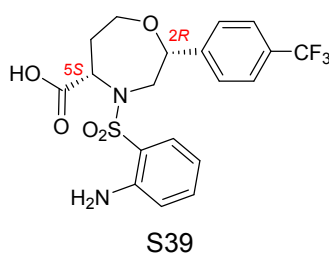

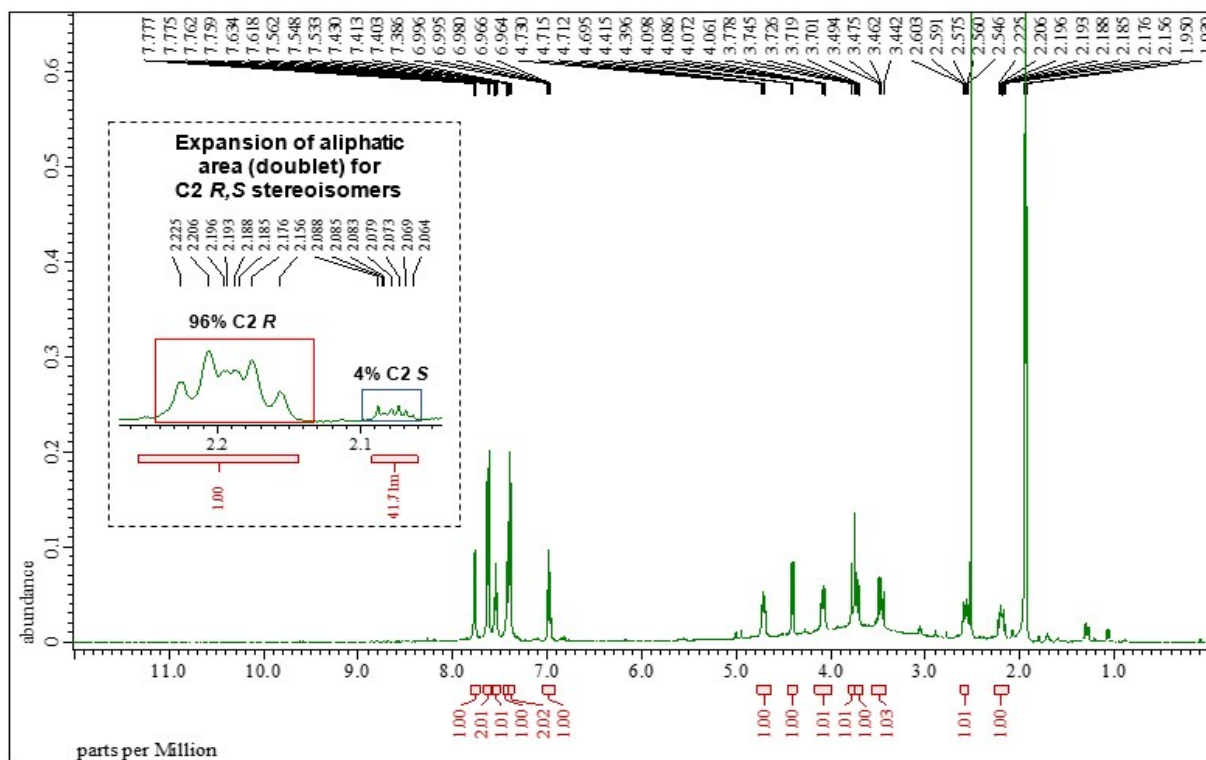

**Figure S72.**  $^1\text{H}$  NMR spectrum of **7q** (500 MHz,  $\text{MeCN-}d_3$ ). Note: Only the signals belonging to the major diastereomer were analyzed.

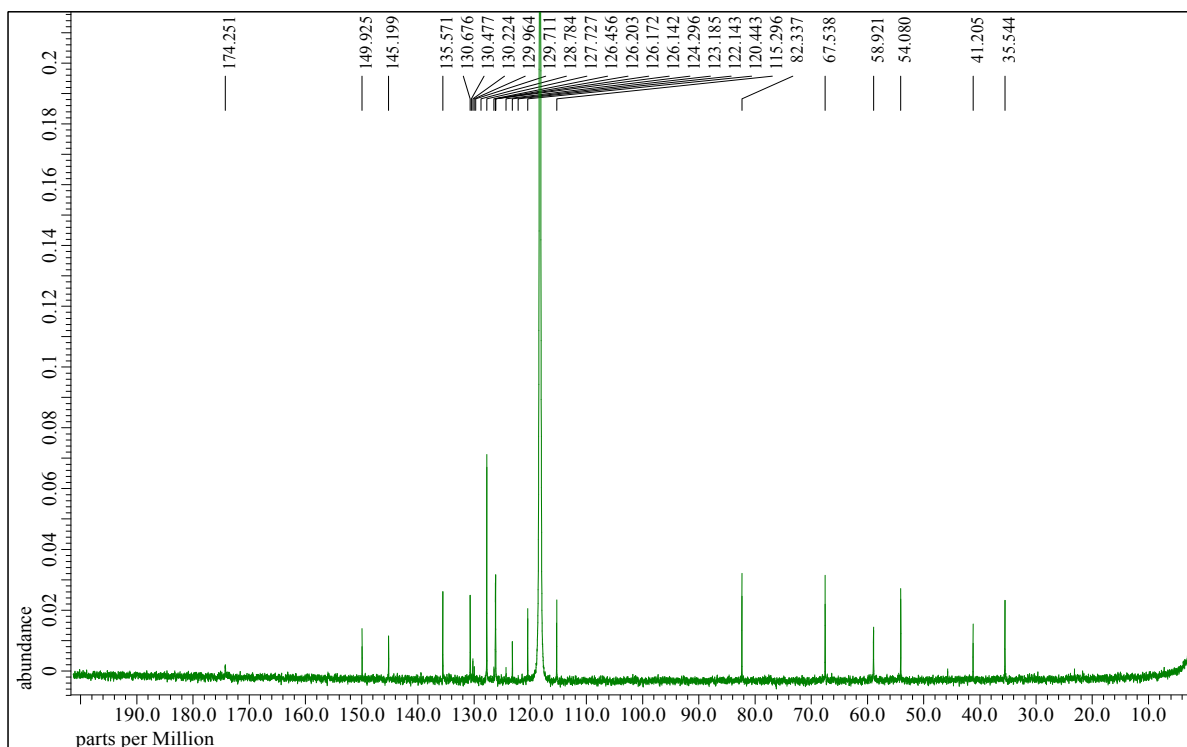

**Figure S73.**  $^{13}\text{C}\{^1\text{H}\}$  NMR spectrum of **7q** (126 MHz,  $\text{MeCN-}d_3$ ). Note: Only the signals belonging to the major diastereomer were analyzed.



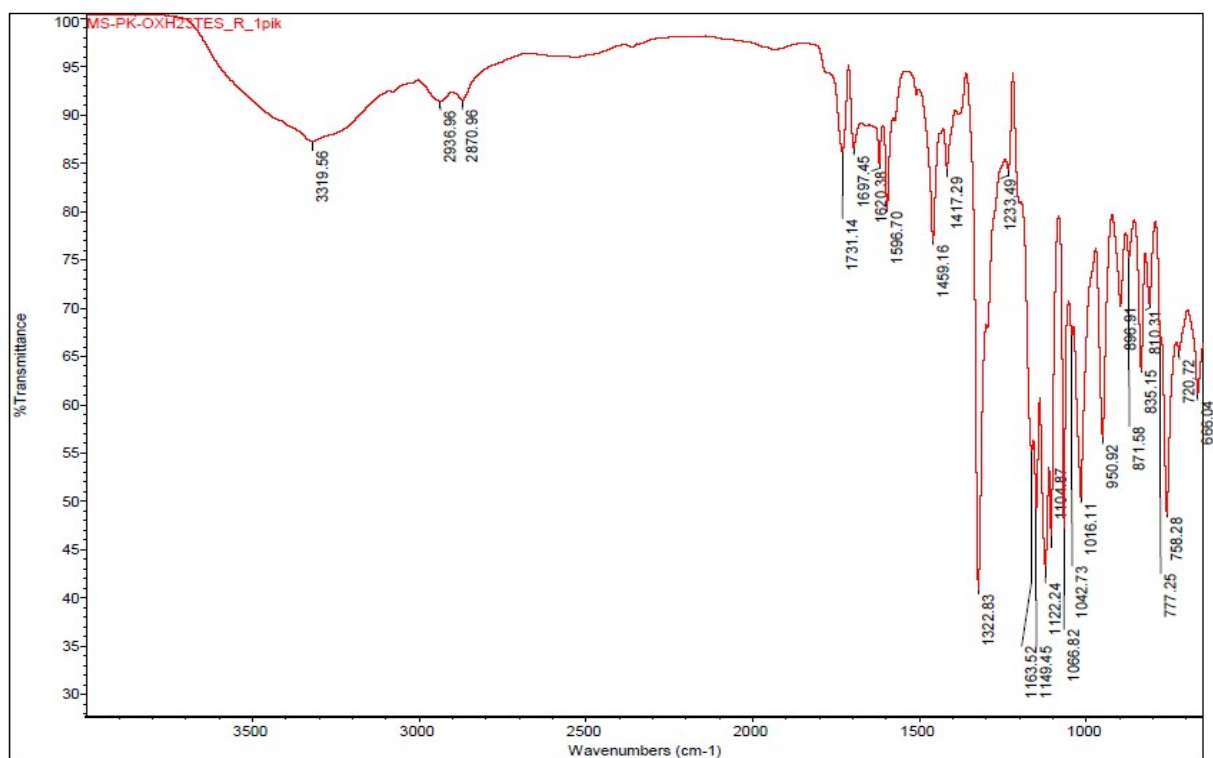

Figure S74. IR spectrum of 7q

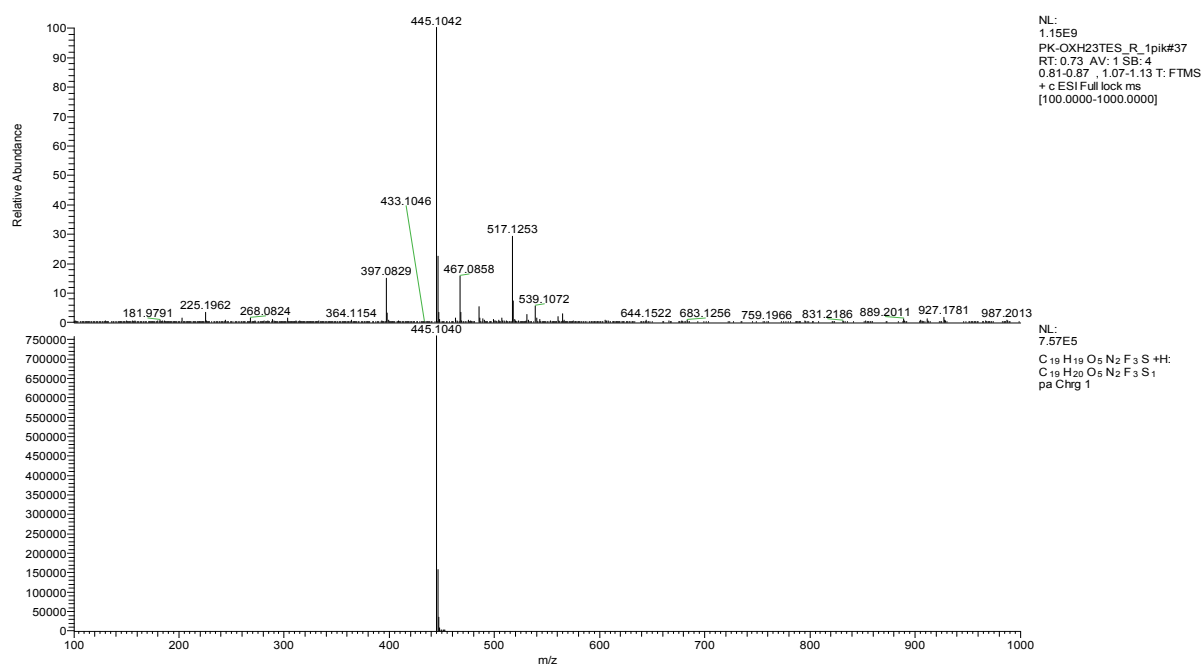

Figure S75. HRMS spectrum of 7q

(-)-(2R,5S)-4-((2-aminophenyl)sulfonyl)-2-(thiophen-3-yl)-1,4-oxazepane-5-carboxylic acid 7t

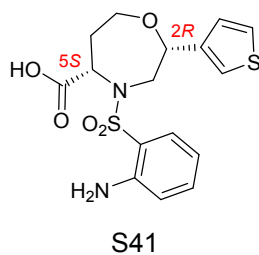

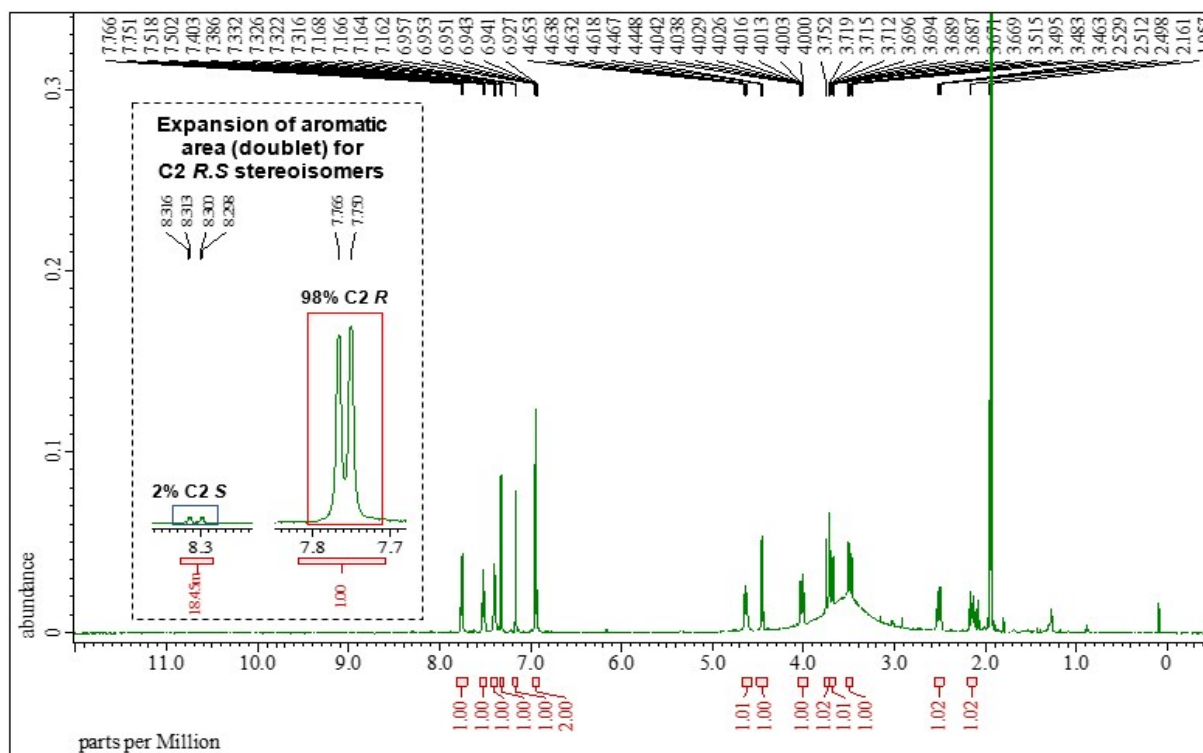

Figure S76.  $^1\text{H}$  NMR spectrum of **7t** (500 MHz,  $\text{MeCN-}d_3$ )

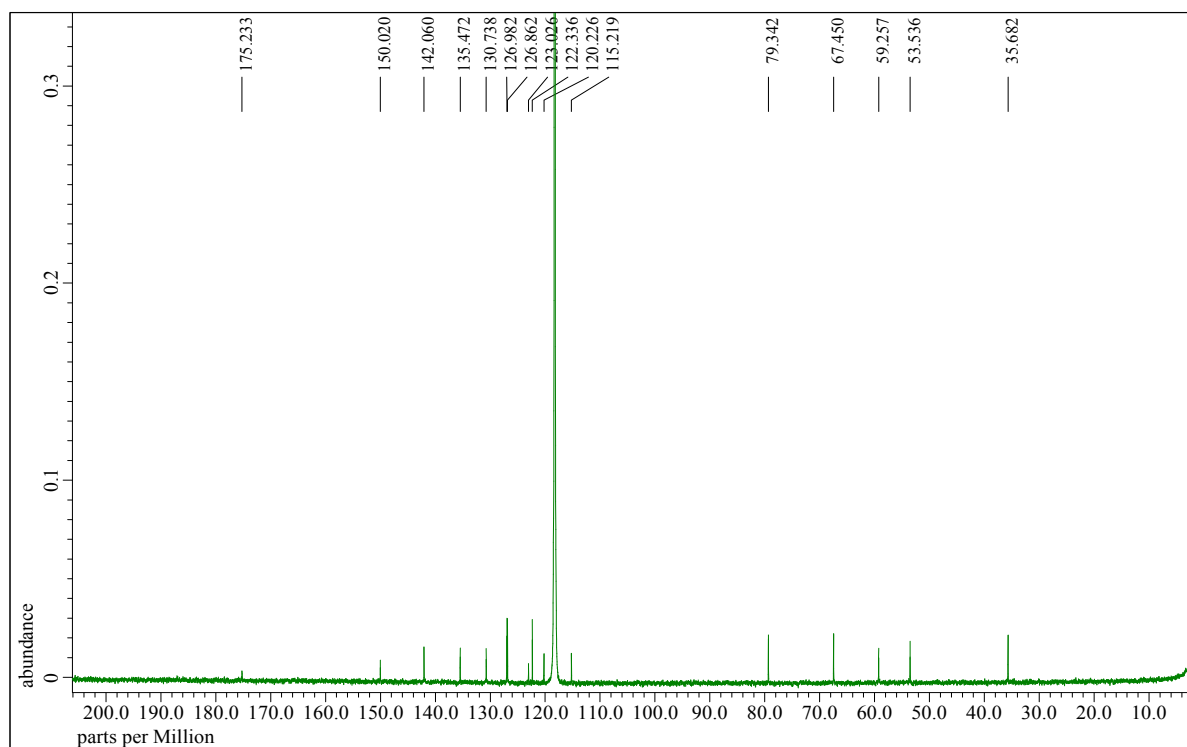

Figure S77.  $^{13}\text{C}\{^1\text{H}\}$  NMR spectrum of **7t** (126 MHz,  $\text{MeCN-}d_3$ )

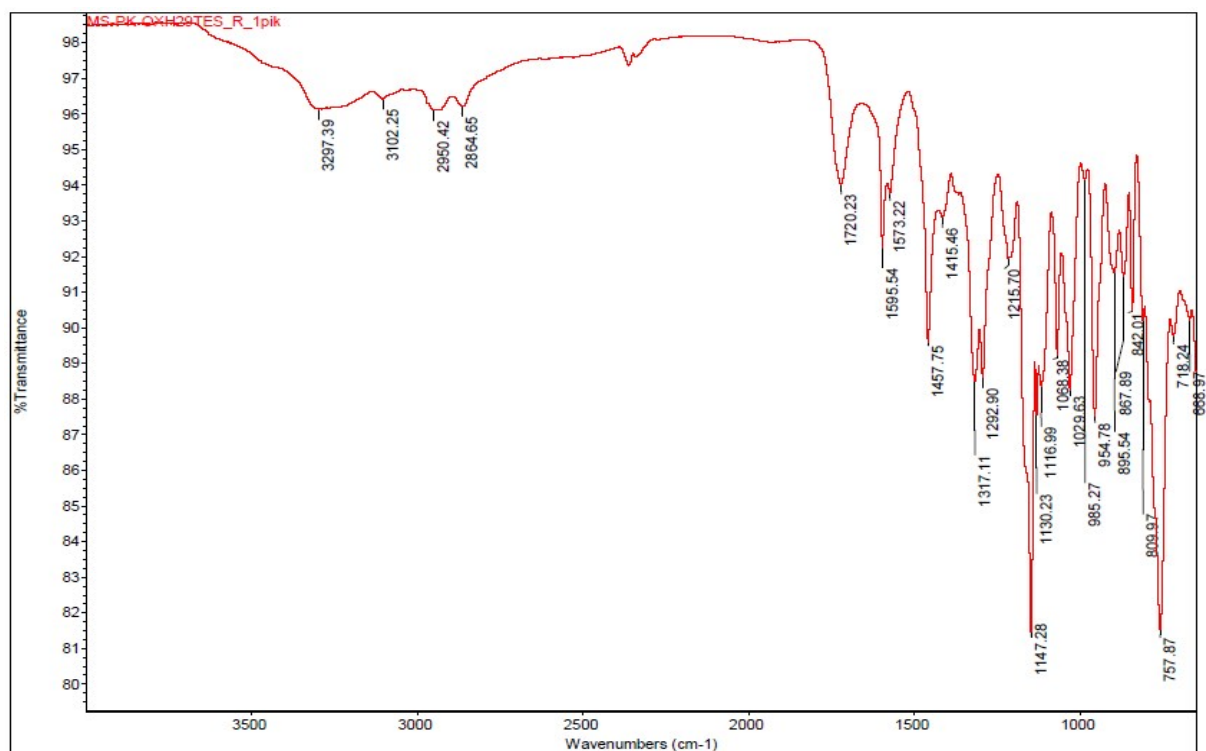

Figure S78. IR spectrum of 7t

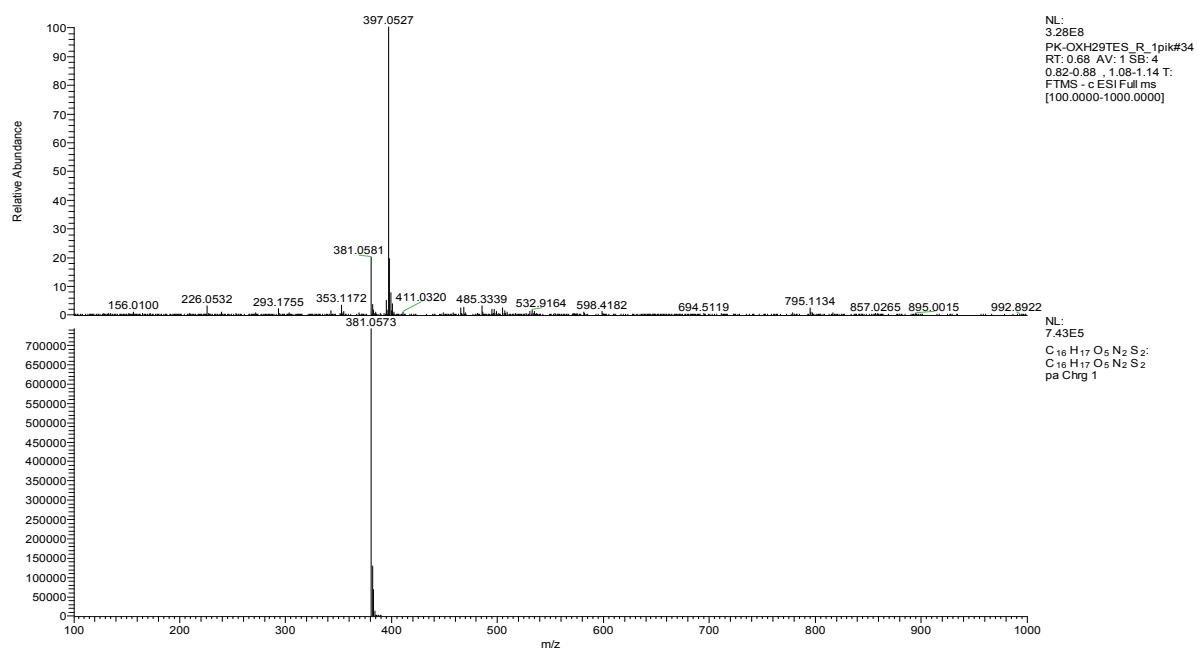

Figure S79. HRMS spectrum of 7t. Note: ion 397 belongs to the ammonium adduct originating from mobile phase.

**(-)-(S)-3-(1,1-dioxo-4-(*o*-tolyl)benzo[*f*][1,2,5]thiadiazepin-2(5*H*)-yl)dihydrofuran-2(3*H*)-one 9h**

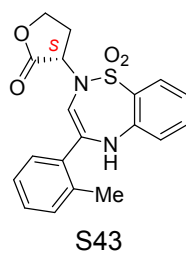

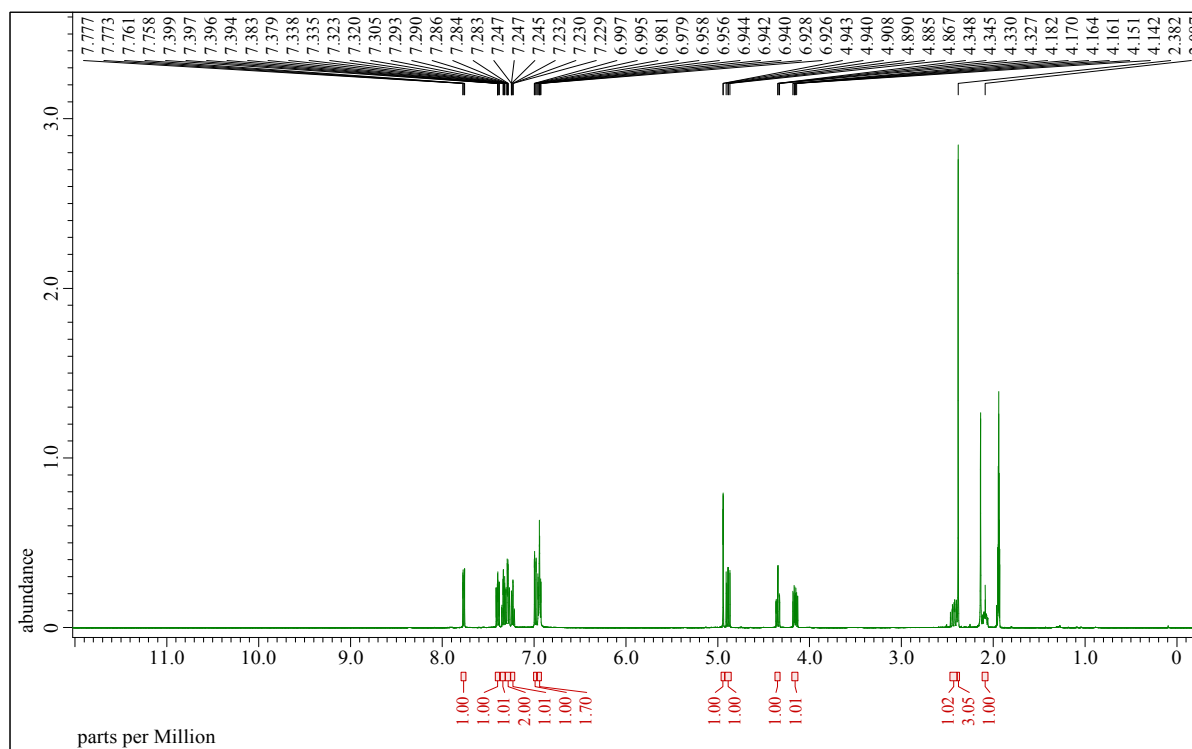

Figure S80.  $^1\text{H}$  NMR spectrum of **9h** (500 MHz,  $\text{MeCN-}d_3$ )

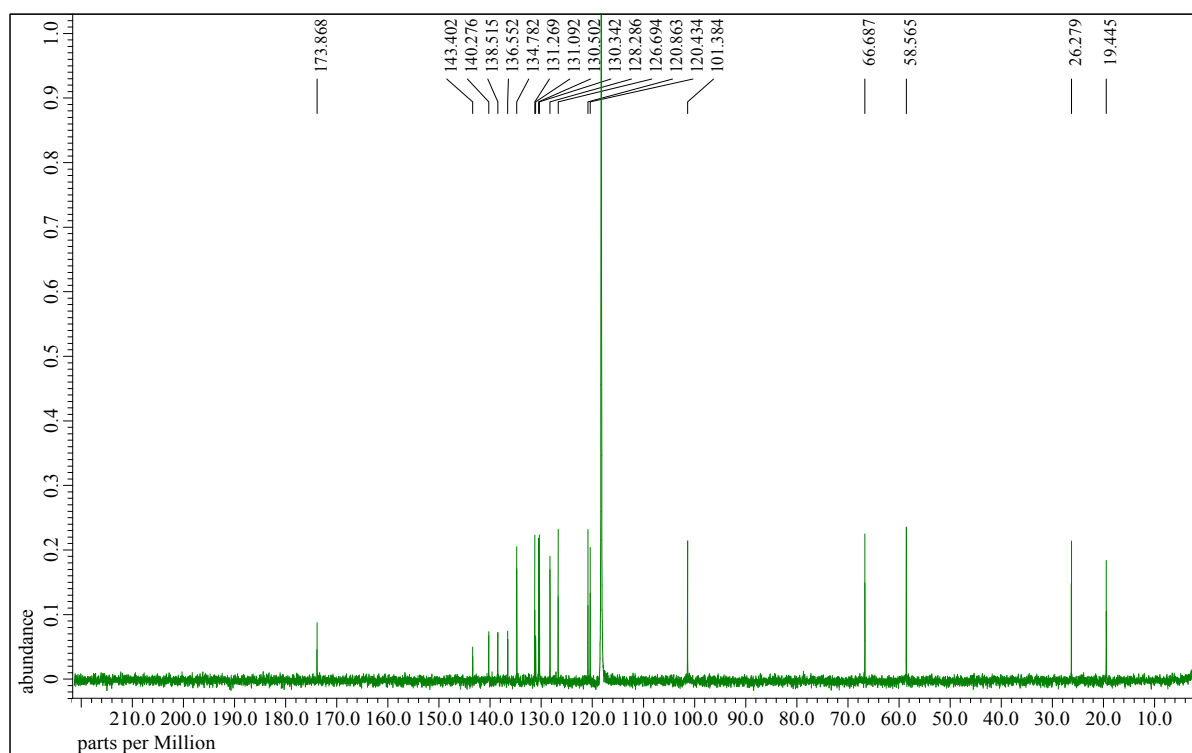

Figure S81.  $^{13}\text{C}\{^1\text{H}\}$  NMR spectrum of **9h** (126 MHz,  $\text{MeCN-}d_3$ )

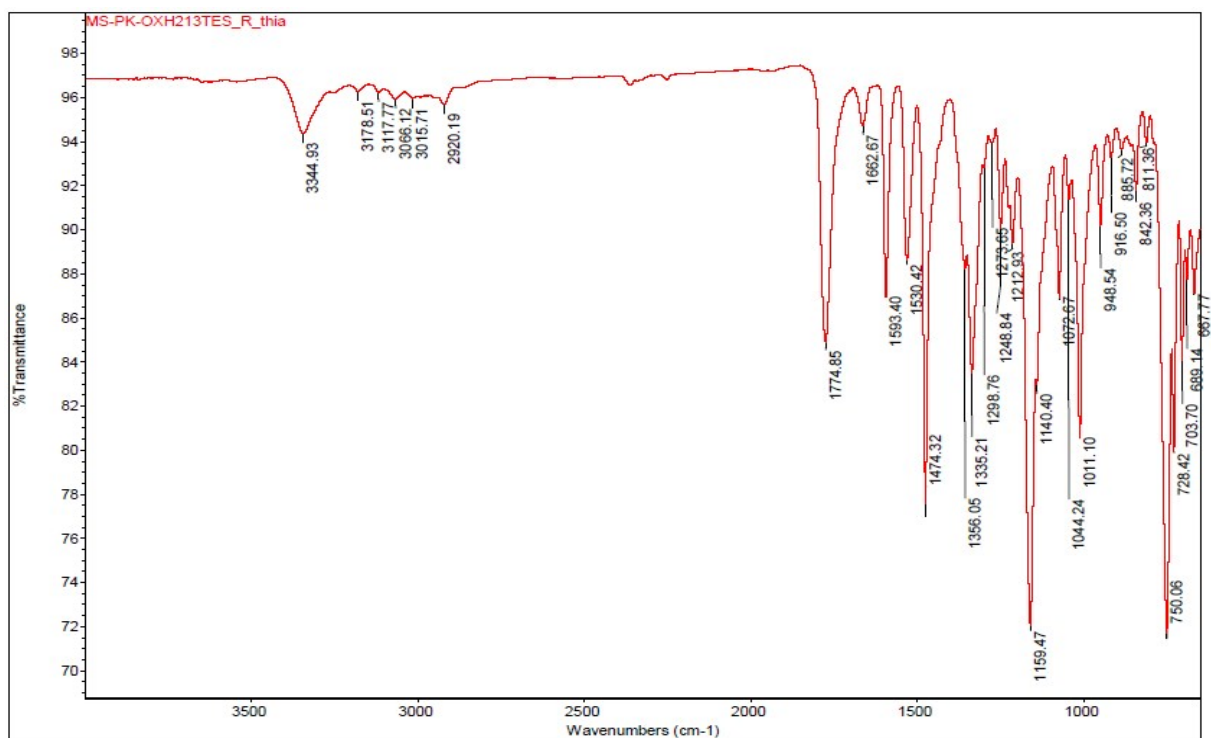

Figure S82. IR spectrum of 9h

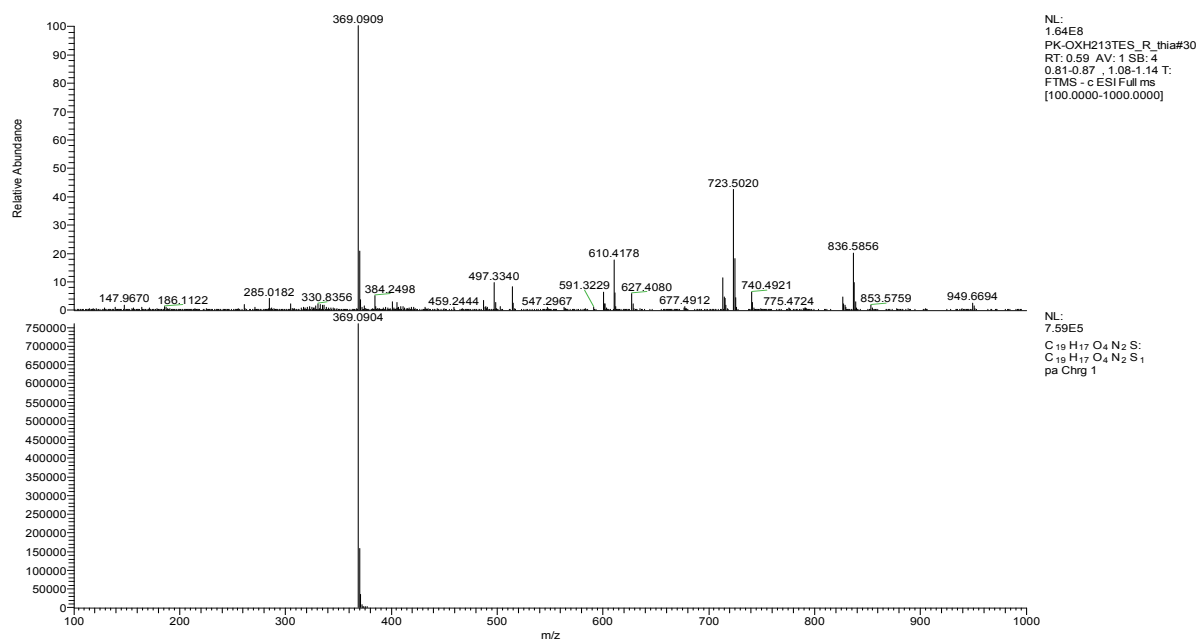

Figure S83. HRMS spectrum of 9h

(-)-(S)-3-(4-(2-bromophenyl)-1,1-dioxobenzo[*f*][1,2,5]thiadiazepin-2(5*H*)-yl)dihydrofuran-2(3*H*)-one 9j

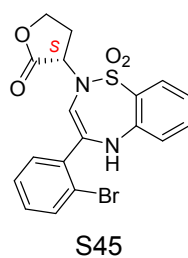

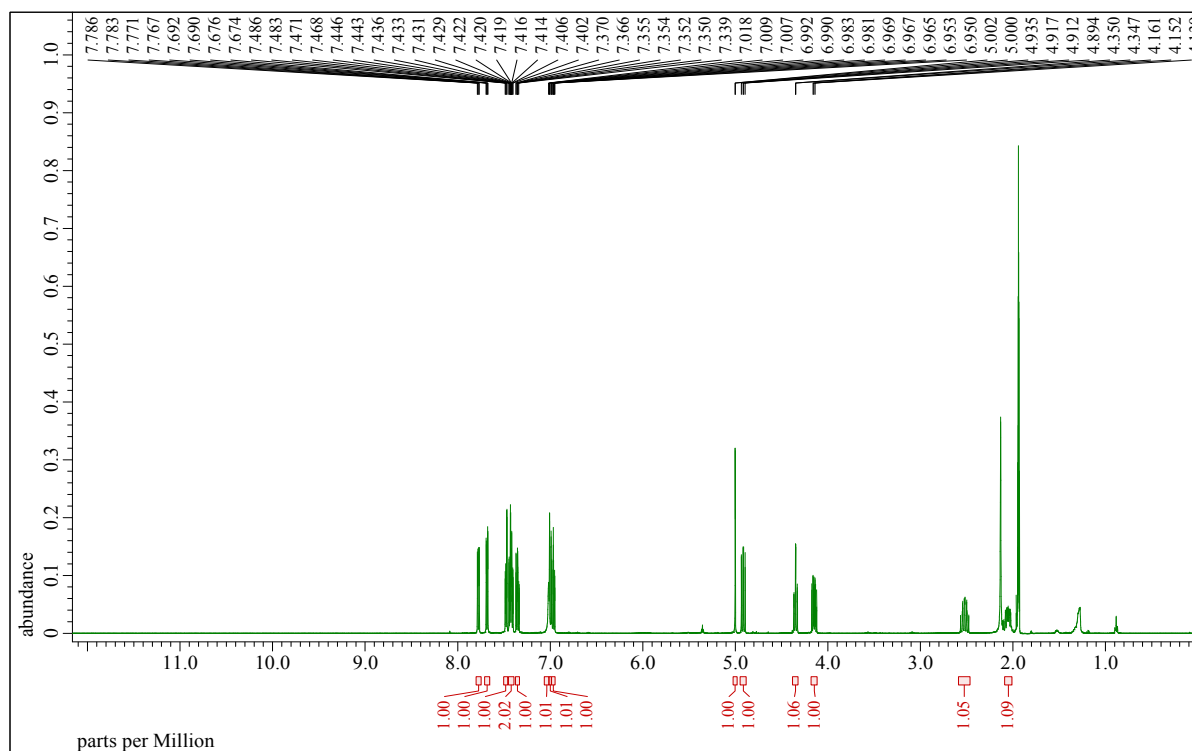

Figure S84.  $^1\text{H}$  NMR spectrum of **9j** (500 MHz,  $\text{MeCN-}d_3$ )

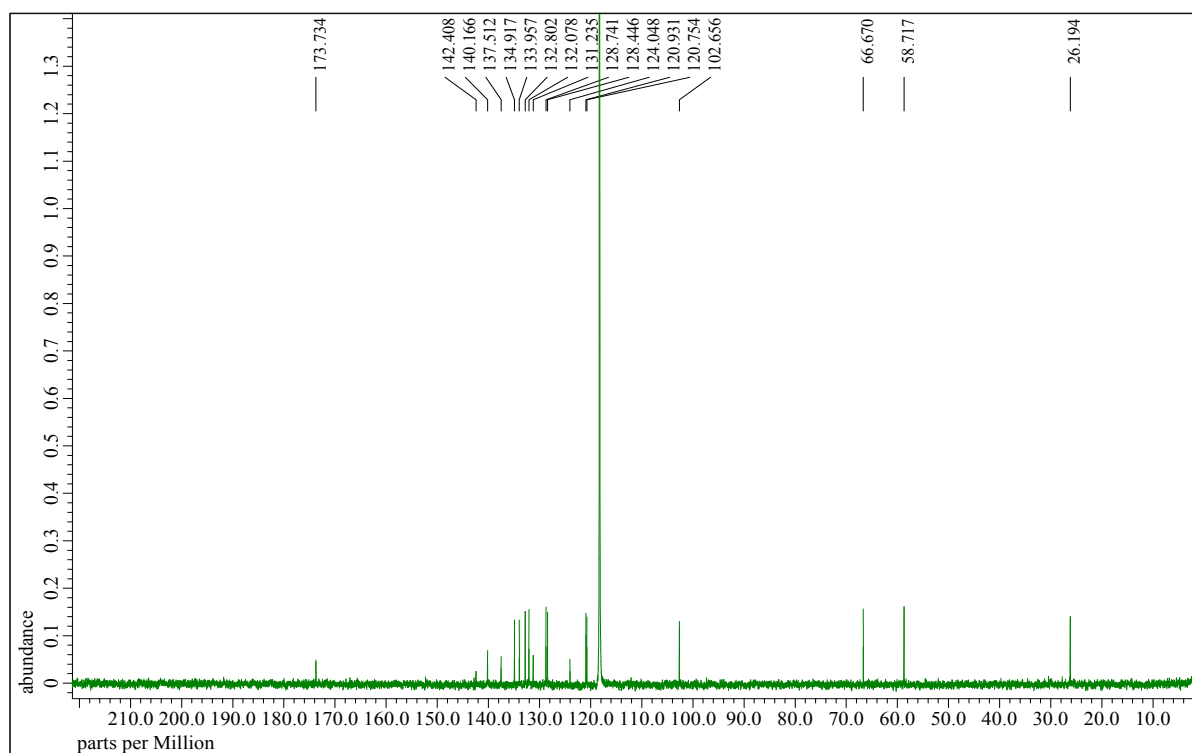

Figure S85.  $^{13}\text{C}\{^1\text{H}\}$  NMR spectrum of **9j** (126 MHz,  $\text{MeCN-}d_3$ )

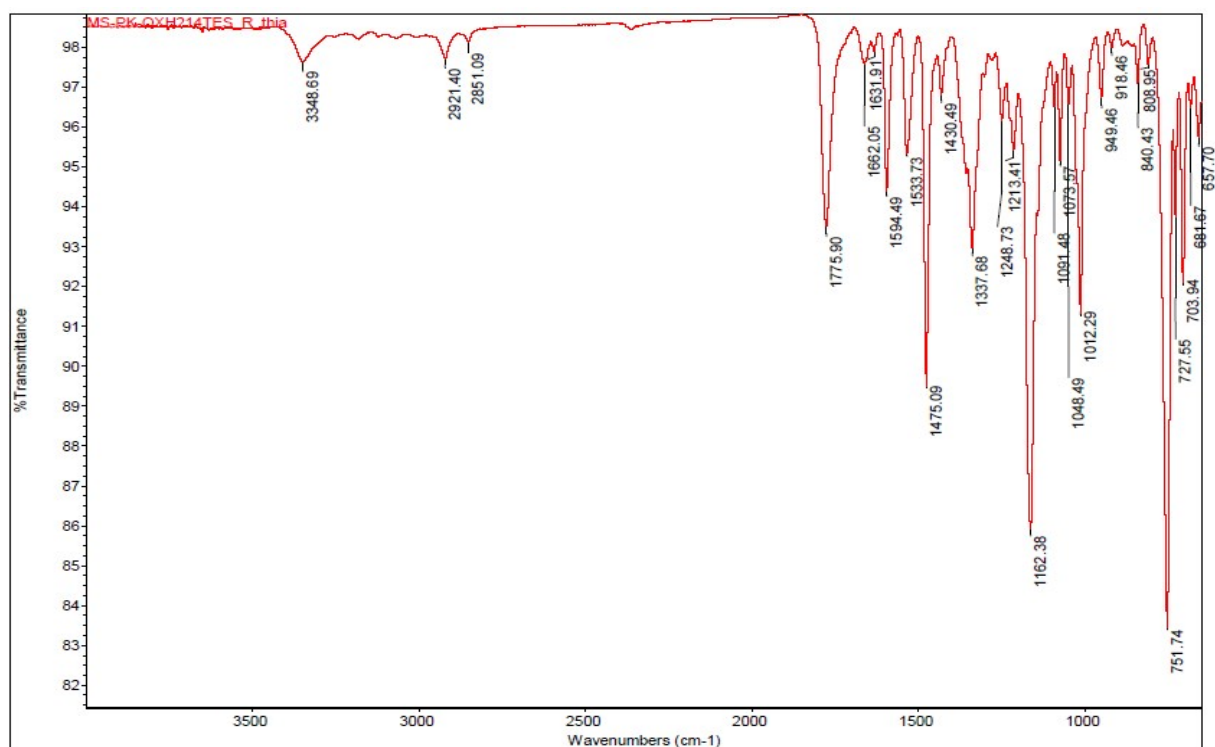

Figure S86. IR spectrum of **9j**

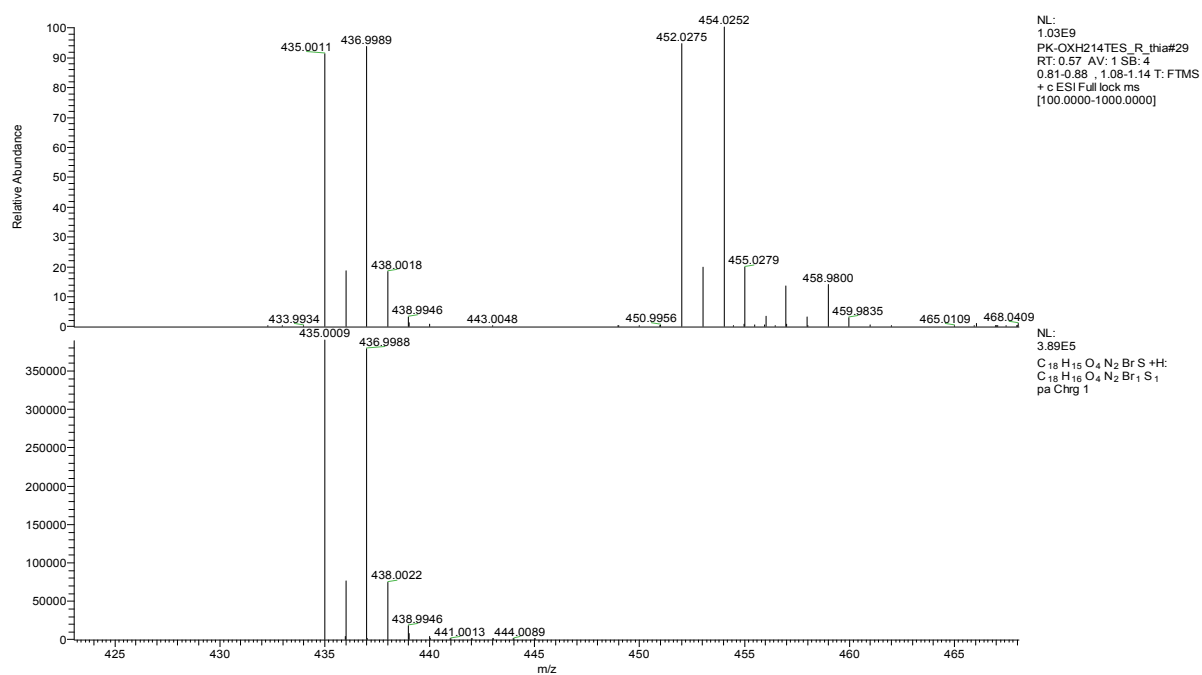

Figure 87. HRMS spectrum of **9j**. Note: ions 452 and 454 belongs to the ammonium adduct originating from mobile phase.

**(+)-(S)-((2-aminophenyl)sulfonyl)-L-homoserine 10r**

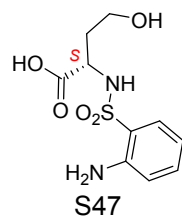

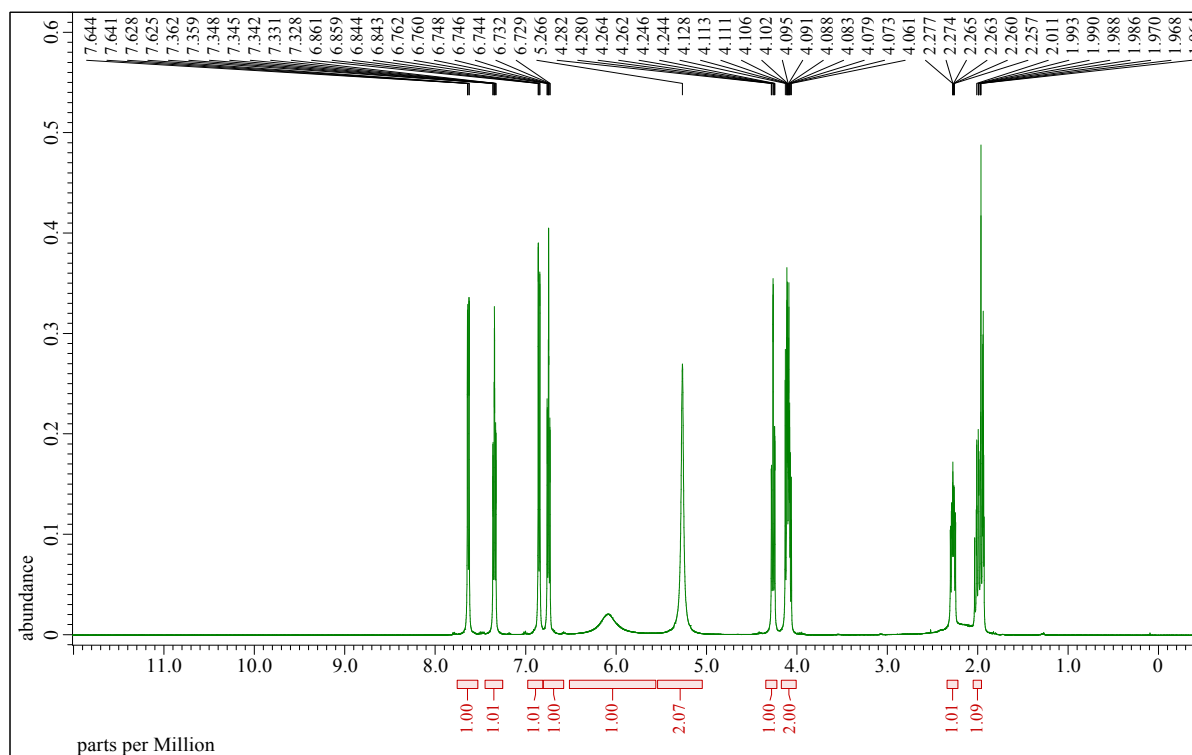

**Figure S88.**  $^1\text{H}$  NMR spectrum of **10r** (500 MHz,  $\text{MeCN-}d_3$ )

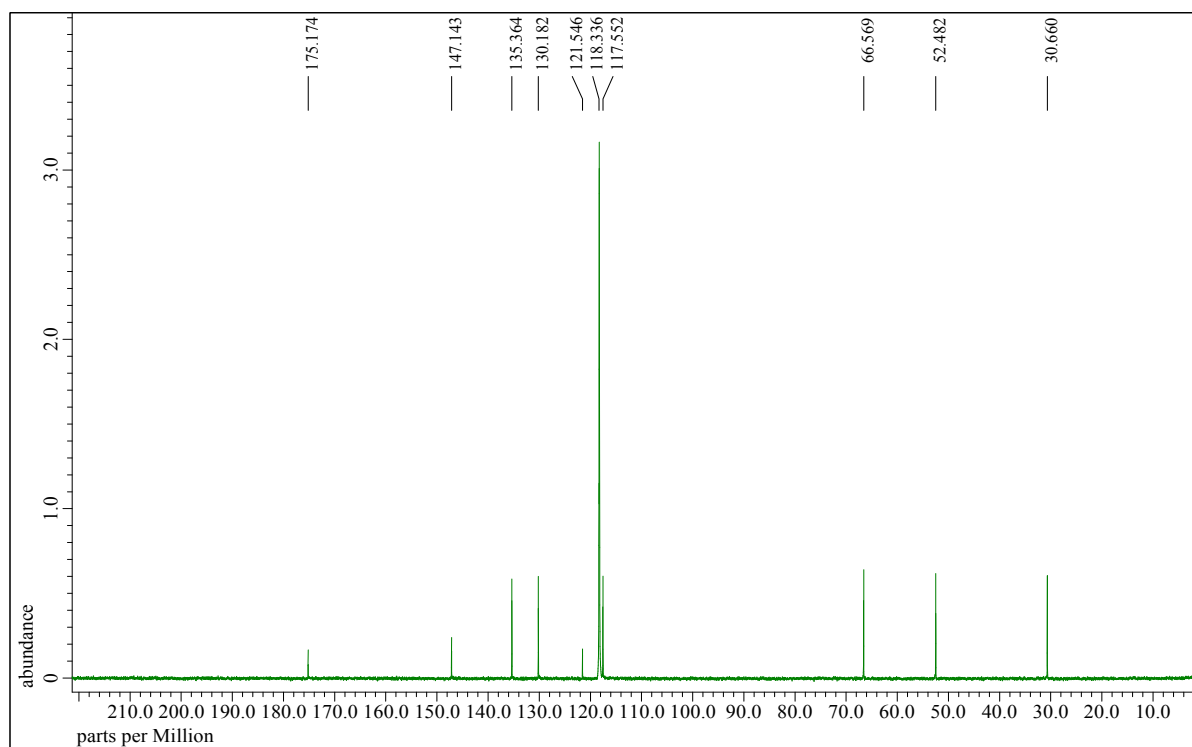

**Figure S89.**  $^{13}\text{C}\{^1\text{H}\}$  NMR spectrum of **10r** (126 MHz,  $\text{MeCN-}d_3$ )



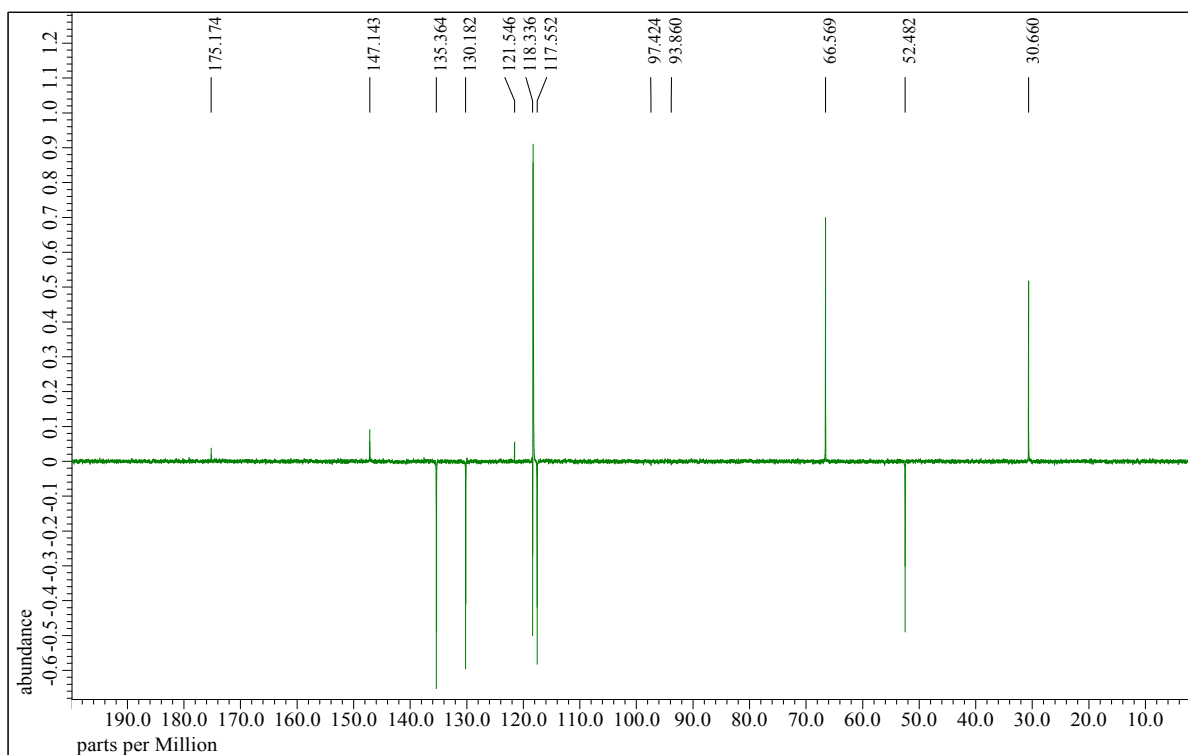

**Figure S90.**  $^{13}\text{C}$  APT NMR spectrum of **10r** (126 MHz,  $\text{MeCN-d}_3$ )

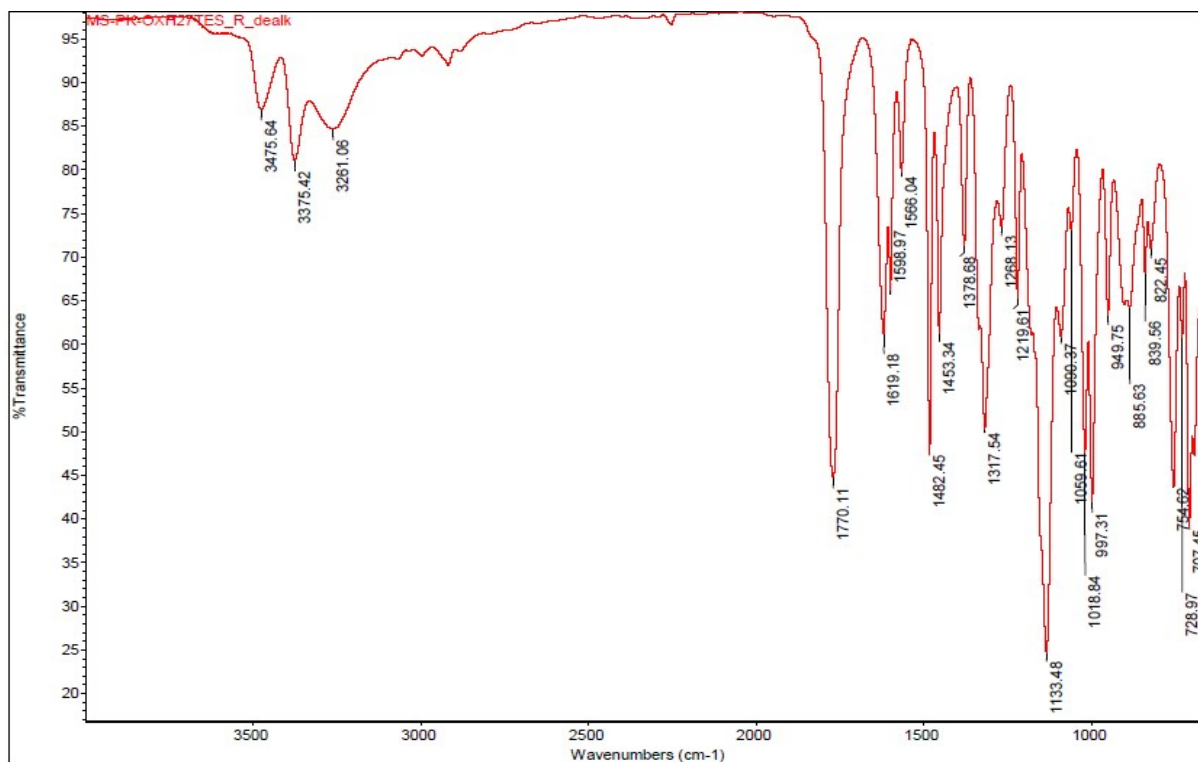

**Figure S91.** IR spectrum of **10r**

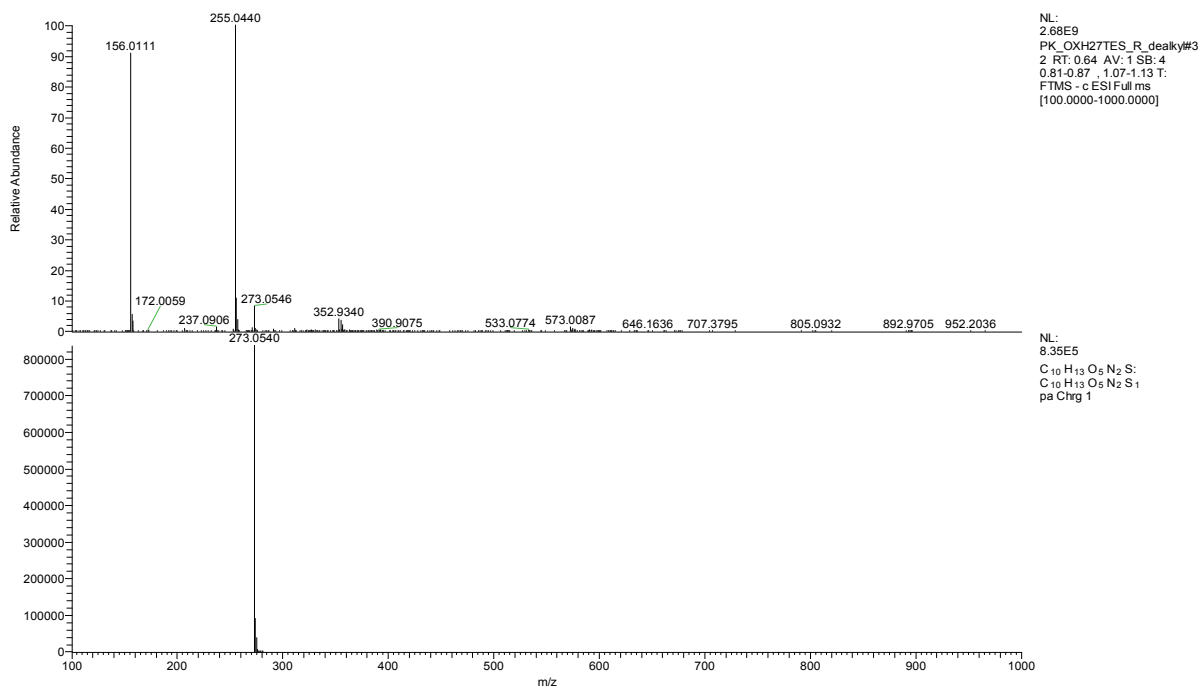

Figure S92. HRMS spectrum of **10r**

**(-)-(*S*)-*N*-(4-methoxyphenethyl)-2-nitro-*N*-(2-oxotetrahydrofuran-3-yl)benzenesulfonamide **11n****

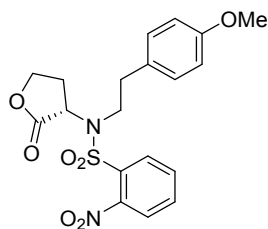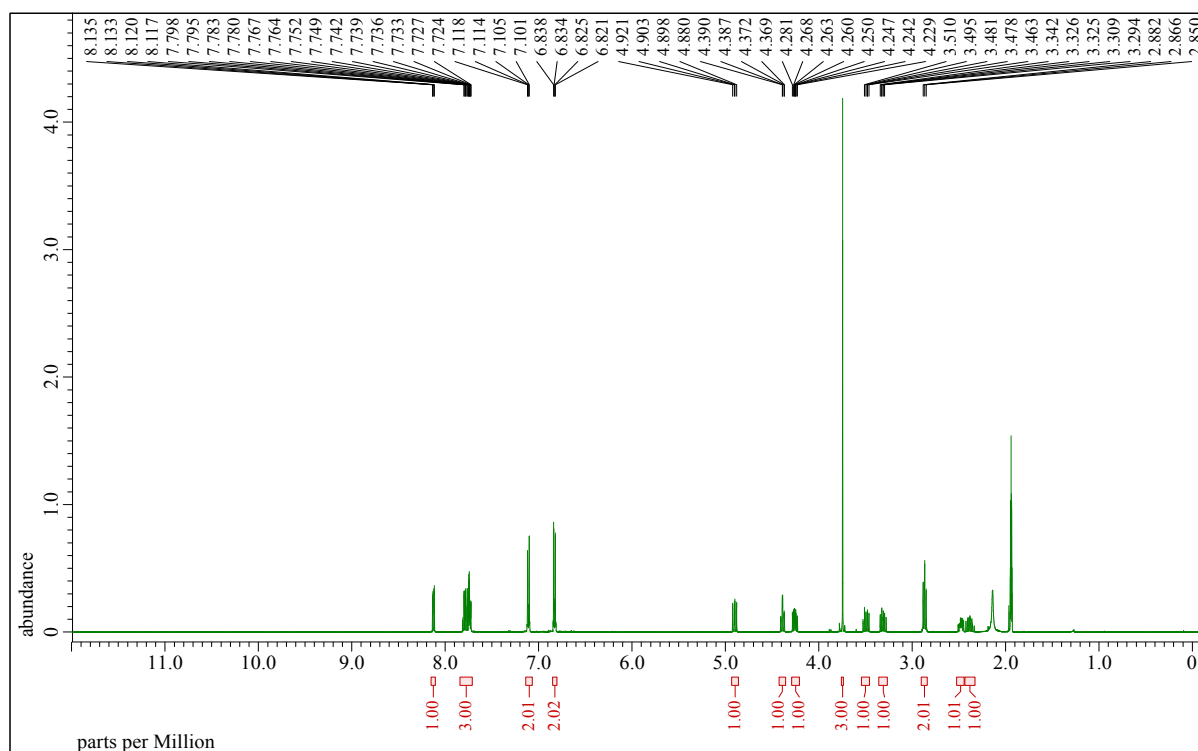

Figure S93. <sup>1</sup>H NMR spectrum of **11n** (500 MHz, MeCN-*d*<sub>3</sub>)  
S50

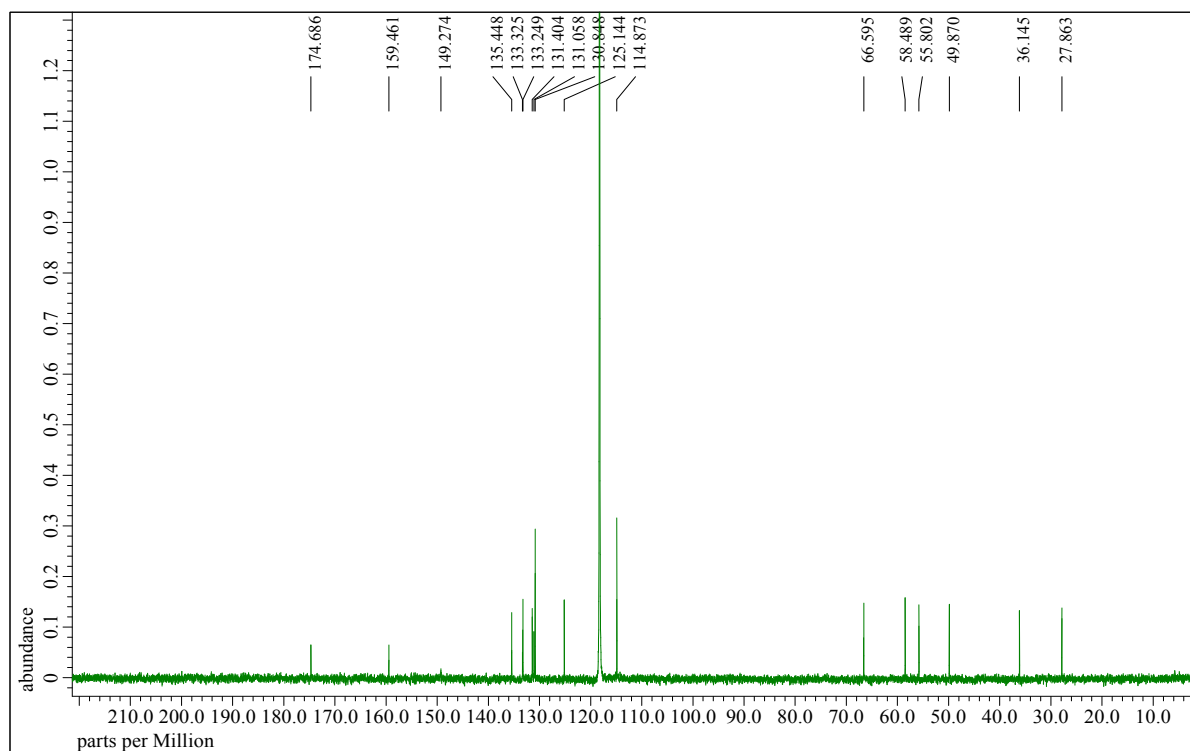

Figure S94.  $^{13}\text{C}\{^1\text{H}\}$  NMR spectrum of **11n** (126 MHz,  $\text{MeCN-}d_3$ )

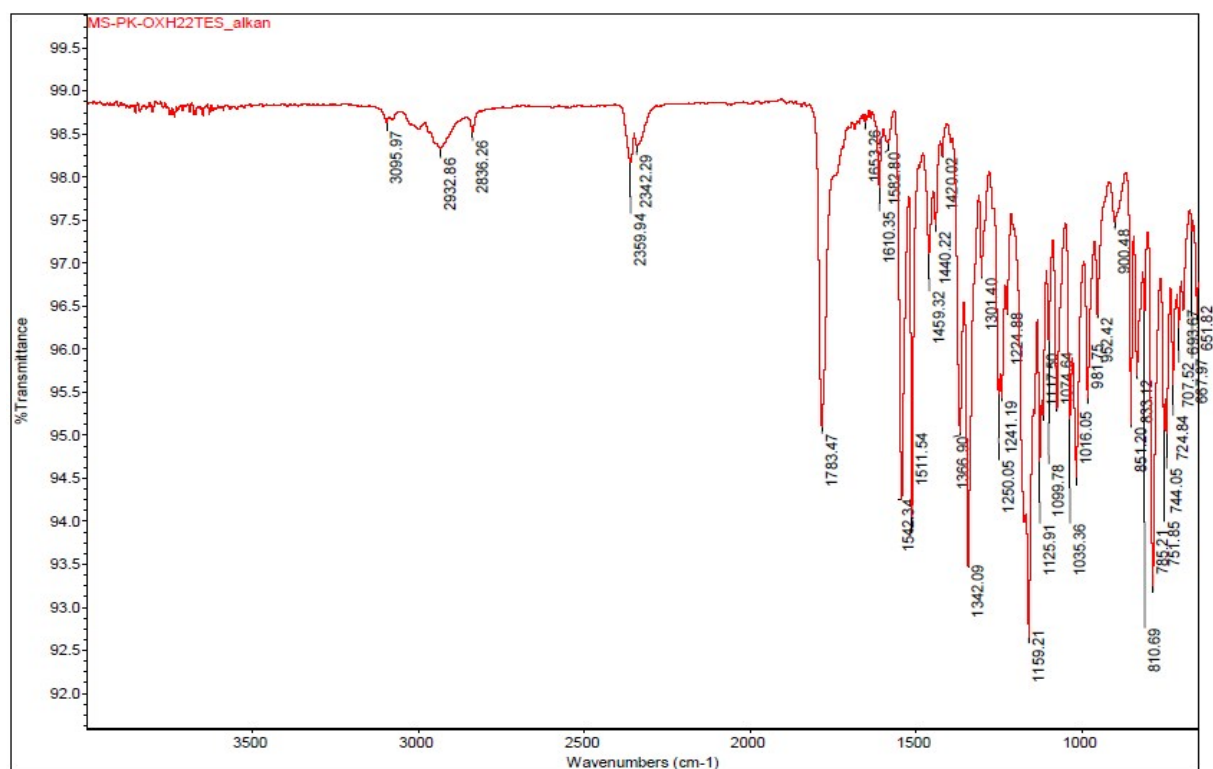

Figure S95. IR spectrum of **11n**

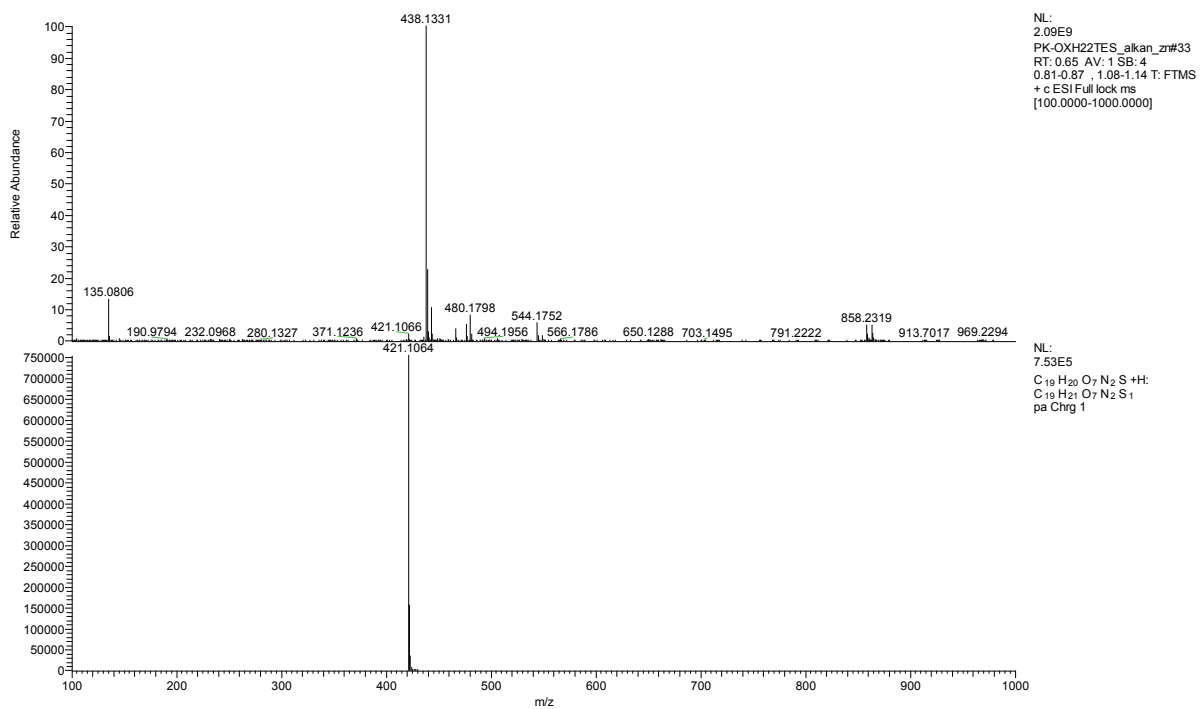

**Figure S96.** HRMS spectrum of **11n**. Note: ion 438 belongs to the ammonium adduct originating from mobile phase.
